1 **Macrophage proliferation machinery leads to PDAC progression, but susceptibility to innate immunotherapy.**

2

3 Chong Zuo<sup>1</sup>, John M. Baer<sup>1</sup>, Brett L. Knolhoff<sup>1</sup>, Jad I. Belle<sup>1</sup>, Xiuting Liu<sup>1</sup>, Graham D. Hogg<sup>1</sup>, Christina Fu<sup>5</sup>,  
4 Natalie L. Kingston<sup>1</sup>, Marcus A. Brenden<sup>1</sup>, Angela Alarcon De La Lastra<sup>1</sup>, Paarth B. Dodhiawala<sup>1</sup>, Cui Zhou<sup>1</sup>,  
5 C. Alston James<sup>2,3</sup>, Li Ding<sup>1,2</sup>, Kian-Huat Lim<sup>1,2</sup>, Ryan C. Fields<sup>2,3</sup>, William G. Hawkins<sup>2,3</sup>, Guoyan Zhao<sup>4,7</sup>,  
6 Jason D. Weber<sup>1,6</sup>, David G. DeNardo<sup>1,2,4\*</sup>

7

8 **Author affiliations:**

9 <sup>1</sup>Department of Medicine, Washington University School of Medicine, St. Louis, MO 63110, USA

10 <sup>2</sup>Siteman Cancer Center, Washington University School of Medicine, St. Louis, MO 63110, USA

11 <sup>3</sup>Department of Surgery, Washington University School of Medicine, St. Louis, MO 63110, USA

12 <sup>4</sup>Department of Pathology and Immunology, Washington University School of Medicine, St. Louis, MO  
13 63110, USA

14 <sup>5</sup>Department of Biology, Grinnell College, Grinnell, IA 50112, USA

15 <sup>6</sup>Department of Cell Biology & Physiology, Washington University School of Medicine, St. Louis, MO 63110,  
16 USA

17 <sup>7</sup>Department of Neuroscience, Washington University School of Medicine, St. Louis, MO 63110, USA

18 \*Corresponding author: David G. DeNardo, Department of Medicine, 425 South Euclid Ave, St. Louis, MO  
19 63110. [ddenardo@wustl.edu](mailto:ddenardo@wustl.edu)

20

21 The authors declare no potential conflicts of interest

22 **Abstract**

23 Tumor-associated macrophages (TAMs) are involved in many aspects of cancer progression and correlate  
24 with poor clinical outcomes in many cancer types, including pancreatic ductal adenocarcinomas (PDACs).  
25 Previous studies have shown that TAMs can populate PDAC tumors not only by monocyte recruitment but  
26 also by local proliferation. However, the impact local proliferation might have on macrophage phenotype  
27 and cancer progression is unknown. Here, we utilized genetically engineered cancer models, single-cell  
28 RNA-sequencing data, and *in vitro* systems to show that proliferation of TAMs was driven by colony  
29 stimulating factor-1 (CSF1) produced by cancer-associated fibroblasts. CSF1 induced high levels of p21 in  
30 macrophages, which regulated both TAM proliferation and phenotype. TAMs in human and mouse PDACs  
31 with high levels of p21 had more inflammatory and immunosuppressive phenotypes. The p21 expression  
32 in TAMs was induced by both stromal interaction and/or chemotherapy treatment. Finally, by modeling p21  
33 expression levels in TAMs, we found that p21-driven macrophage immunosuppression *in vivo* drove tumor  
34 progression. Serendipitously, the same p21-driven pathways that drive tumor progression, also drive  
35 response to CD40 agonist. These data suggest that stromal or therapy-induced regulation of cell cycle  
36 machinery can regulate both macrophage-mediated immune suppression and susceptibility to innate  
37 immunotherapy.

38

39 **Summary**

40 TAMs are indicative of poor clinical outcomes and in PDAC their number is sustained in part by local  
41 proliferation. This study shows that stromal desmoplasia drives local proliferation of TAMs, and induces  
42 their immunosuppressive ability through altering cell cycle machinery, including p21 expression.  
43 Serendipitously, these changes in p21 in TAMs also potentially render tumors more sensitive to CD40  
44 agonist therapy.

45

46

47

## 48 **Introduction**

49           Macrophages are one of the most abundant immune cell types in the tumor microenvironment (Noy  
50 and Pollard, 2014). Extensive studies have shown that macrophages can mediate tumor  
51 immunosuppression by both directly interacting with cytotoxic T cells and indirectly affecting T cell functions  
52 through secretions of immuno-modulators that create a favorable tumor microenvironment (DeNardo and  
53 Ruffell, 2019; Cassetta and Pollard, 2018; Doedens et al., 2010). Aside from their immunosuppressive  
54 phenotypes, macrophages are known to promote tumor initiation, angiogenesis, local invasion, and  
55 metastatic spread (Ruffell and Coussens, 2015; Hao et al., 2012; Cassetta and Pollard, 2018).  
56 Unsurprisingly, the presence of macrophages is found to be associated with a poor clinical outcome in  
57 many cancers, including pancreatic cancer (Cassetta and Pollard, 2018; Ino et al., 2013). As such,  
58 preclinical and clinical studies have focused on targeting tumor-associated macrophages (TAMs). These  
59 approaches, often consisting of macrophage-depleting strategies, have yet to show clinical success, in spite  
60 of showing efficacies in preclinical models (DeNardo and Ruffell, 2019; Cannarile et al., 2017; Poh and  
61 Ernst, 2018; Xiang et al., 2021). This suggests more studies are needed to understand the varied subset  
62 of macrophages in tumors and how they impact tumor immunity and cancer progression.

63           During tissue damage, macrophage numbers can be increased by multiple mechanisms. These  
64 include the expansion of tissue resident macrophage populations by local proliferation or new macrophages  
65 can be recruited from blood monocytes (Ginhoux and Guilliams, 2016). This balance is likely regulated by  
66 both the tissues and types of damage. In pancreatic ductal adenocarcinoma (PDAC), macrophages are  
67 derived from both monocyte and tissue resident sources (Zhu et al., 2017). One consistent characteristic  
68 of TAMs from both sources in PDAC mouse models is that they are highly proliferative (Zhu et al., 2017).  
69 Notably, proliferation of macrophages is not only observed in tumors, but also in injured and inflamed  
70 tissues (Hashimoto et al., 2013; Davies et al., 2011; Van Gassen et al., 2015). Under these conditions,  
71 inhibiting macrophage proliferation dramatically reduced macrophage number and inflammation (Tang et  
72 al., 2015). These observations raised the possibility that inhibiting macrophage proliferation in PDAC might  
73 limit the number of tumor-promoting macrophages.

74           Macrophage proliferative status is commonly associated with underlying macrophage phenotypes.  
75 Interferon gamma (IFN- $\gamma$ ) and lipopolysaccharide (LPS) inhibit macrophage proliferation and induce  
76 production of nitric oxide (NO) and inflammatory cytokines (Müller et al., 2017; Xaus et al., 2000; Marchant  
77 et al., 1994). Interleukin (IL)-4 promotes macrophage proliferation and drives them to a T<sub>H</sub>-2 like phenotype  
78 (Jenkins et al., 2013). These observations led to the question of whether the macrophage proliferation  
79 machinery plays a role in regulating macrophage phenotypes.

80           In this study, we aimed to understand how the PDAC microenvironment drove local macrophage  
81 proliferation and what the net outcome of this was on tumor immunity and progression. We discovered that  
82 while cancer-associated fibroblast-induced macrophage proliferation was important for sustaining TAM  
83 number, induction of p21 in TAMs by stromal colony stimulating factor-1 (CSF1) resulted in  
84 immunosuppression and tumor progression.

85

## 86 **Results**

### 87 **Tumor infiltrating macrophages are highly proliferative in PDAC.**

88 To evaluate human PDAC infiltration by TAMs, we utilized multiplex immunohistochemistry  
89 (mpIHC) to stain for CD68<sup>+</sup> macrophages and CK19<sup>+</sup> tumor cells in human PDAC tissues and found that  
90 CD68<sup>+</sup> TAMs were more frequent in PDAC tissues when compared to adjacent normal pancreas tissues  
91 (Fig. 1 A). To further study infiltrating macrophages, we utilized a p48-Cre<sup>+</sup>/LSL-Kras<sup>G12D</sup>/p53<sup>fllox/fllox</sup> (KPC)  
92 genetically engineered mouse model (GEMM), which spontaneously develops PDAC tumors and  
93 recapitulates the pathological features of human PDAC (Hingorani et al., 2003, 2005). As in human PDAC,  
94 we found that the number of F4/80<sup>+</sup> TAMs increased paralleling disease progression (Fig. 1 B and Fig. S1  
95 A). Our previous studies have shown that these PDAC infiltrating TAMs were sustained by both local  
96 proliferation and monocyte recruitment in animal models (Zhu et al., 2017). However, these studies did not  
97 assess the potential impact macrophage proliferation might have on tumor progression or tumor immunity.

98 To further investigate the significance and mechanisms of local proliferation of TAMs, we more  
99 deeply studied pancreatic tissues from GEMMs and human PDAC patients. We first evaluated the  
100 frequency of proliferating macrophages in human PDAC tumors by mass cytometry time of flight (CyTOF).  
101 Distinguishing major leukocyte populations based on surface markers, we found that CD68<sup>+</sup>CD64<sup>+</sup>  
102 macrophages composed >15% of all infiltrating leukocytes (Fig. 1, C and D and Fig. S1 B). Notably, these  
103 macrophages expressed high levels of the proliferation markers PCNA and Ki67 (Fig. 1 C). Ki67<sup>+</sup>  
104 macrophages made-up 20% of total macrophages, and this percentage was significantly higher than that  
105 of other leukocyte populations, such as neutrophils (Fig. 1 E and Fig. S1 C). Next, we examined proliferating  
106 macrophages in tumors from KPC GEMMs. We observed >10% of F4/80<sup>+</sup> cells were also Ki67<sup>high</sup> by mpIHC  
107 analysis (Fig. 1, H and I). In addition, we generated and analyzed single-cell RNA-sequencing (scRNAseq)  
108 data from normal pancreas, pancreatic tissues from KPC GEMMs, orthotopic PDAC tumors, and previously  
109 published human PDAC datasets (Peng et al., 2019) (Fig. S1 D). In human PDACs, we found populations  
110 carrying both myeloid and proliferating signatures (Fig. 1, F and G). Similarly, in mouse datasets, we  
111 identified TAMs independent of cell cycle genes (Fig. 1 J and Fig. S1 E), then upon reclustering, we easily  
112 identified discrete clusters with cell cycle gene signatures (Fig. 1 K). As expected, this cluster was expanded  
113 in PDACs compared to normal tissues (Fig. 1, L and M). Taken together, these data suggest that a  
114 significant portion of macrophages are actively proliferating in both murine and human PDAC tissues.

115

### 116 **Cancer-associated fibroblasts drive macrophage proliferation through CSF1.**

117 To identify the cellular players that drove macrophage proliferation in PDAC, we investigated the  
118 cellular composition in the PDAC tumor microenvironment (TME). As others have shown, PDAC tumors  
119 contain dense fibrotic stroma (Elyada et al., 2019; Schnittert et al., 2019; Waghray et al., 2013), and  
120 immunohistochemistry (IHC) staining of PDAC tissues from KPC GEMMs revealed abundant PDPN<sup>+</sup>  
121 cancer-associated fibroblasts (CAFs) surrounding CK19<sup>+</sup> tumor cells (Fig. 2 A). We next performed  
122 proximity analysis and found that TAMs were within 100  $\mu$ m to both tumor cells and CAFs, but more

123 frequently closer to PDPN<sup>+</sup> CAFs than CK19<sup>+</sup> tumor cells (Fig. 2 B). To test whether fibroblasts and tumor  
124 cells drove macrophage proliferation, we co-cultured bone marrow-derived macrophages (BMDMs) with  
125 either PDAC cell lines from KPC GEMMs or primary pancreatic fibroblasts. We found that PDAC cells and  
126 fibroblasts both led to increases in macrophage proliferation, as measured by BrdU incorporation. However,  
127 fibroblasts induced significantly higher levels of proliferation and increases in the number of macrophages  
128 (Fig. 2 C). Additionally, macrophage proliferation was not further enhanced by triple culture of PDAC cells  
129 and fibroblasts, suggesting the effects were not additive (Fig. 2 C, grey bars). To determine if fibroblasts  
130 induced macrophage proliferation in a cell contact-dependent manner or through secreted factors, we  
131 repeated these assays in a Transwell system. We found that without direct contact to BMDMs, fibroblasts  
132 still drove macrophage proliferation at almost a comparable level as the strong mitogen, CSF1 (Fig. 2 D).

133 To identify the relevant secreted factors from fibroblasts that drove macrophage proliferation, we  
134 profiled 111 soluble factors derived from two PDAC cell lines (KP-1, KP-2), or fibroblast-conditioned media  
135 and found that fibroblasts secreted significantly higher levels of CSF1 (Fig. 2 E). We measured the levels  
136 of CSF1 secreted by fibroblasts and three different PDAC cell lines (KP-1, KP-2, and KI) through ELISAs  
137 and confirmed that only fibroblasts produced high levels of CSF1 (Fig. 2 F). Next we sought to determine if  
138 CSF1 was necessary and sufficient for fibroblasts to drive macrophage proliferation. Both the addition of  
139 neutralizing  $\alpha$ CSF1 IgG to the co-culture of BMDMs and fibroblasts, and knocking-down CSF1 in fibroblasts  
140 by siRNA in Transwell assays, resulted in a loss of fibroblast-driven macrophage proliferation and number  
141 expansion (Fig. 2, G,H and I). These data suggest that CSF1 secreted from fibroblasts is both necessary  
142 and sufficient for macrophage proliferation *in vitro*.

143 To confirm CAFs drive TAMs proliferation in *in vivo* pancreatic tissue, we analyzed scRNAseq  
144 datasets from both mouse and human. In a previously published dataset (Hosein et al., 2019) of pancreatic  
145 tumors from three GEMM models, including  $Kras^{LSL-G12D/+}Ink4a^{fl/fl}/Ptf1a^{Cre/+}$  (KIC),  $Kras^{LSL-G12D/+}Trp53^{LSL-}$   
146  $R172H/+}Ptf1a^{Cre/+}$  (KPR172H/+ C), and  $Kras^{LSL-G12D/+}Trp53^{fl/fl}/Pdx1^{Cre/+}$  (KPfC), we found that fibroblasts expressed  
147 higher levels of CSF1 than other cell types (Fig. 3, A and B). In a human PDAC dataset (Peng et al., 2019)  
148 comprised of 21 PDAC samples, fibroblasts also expressed a higher level of CSF1 than tumor cells and  
149 other cells within the TME (Fig. 3, C and D). Others have also detected CSF1 in the cultures of primary  
150 CAFs from PDAC patients (Samain et al., 2021). Collectively, these data suggest that fibroblasts are the  
151 main producers of CSF1 in the PDAC TME. Next, we injected  $\alpha$ CSF1 IgG into mice bearing orthotopic KP-  
152 2 tumors and measured macrophage proliferations 12 and 24 h after the injection. Similar to the *in vitro*  
153 experiments, we found a significant reduction in the percentage of macrophages undergoing proliferation,  
154 measured by BrdU incorporation (Fig. 3, E, F and G). We have previously shown that sustained CSF1  
155 depletion, exceeding 48 h, led to macrophage depletion by apoptosis (Zhu et al., 2014). To eliminate the  
156 possibility that the decrease in proliferation came from macrophage death, we quantified macrophage  
157 numbers and found no change (Fig. 3 H). Additionally, we found that proliferation of monocytes was minimal  
158 and not significantly affected by  $\alpha$ CSF1 IgG treatment (Fig. 3 I), confirming that the reduction of proliferation

159 was mainly from macrophages. Taken together, these data suggest that CSF1 secreted by cancer-  
160 associated fibroblasts drives local macrophage proliferation in pancreatic cancer.

### 161 **The p21 cell cycle-dependent kinase inhibitor was induced in TAMs by CAF-derived CSF1.**

162 We next asked whether the macrophage proliferation machinery regulated by CAF-derived CSF1  
163 could impact the TAM phenotype. We first examined the expressions of several critical cell cycle regulators  
164 in BMDMs following treatment with either CSF1, the proliferative mitogen, or lipopolysaccharide (LPS),  
165 which is known to blunt macrophage proliferation (Liu et al., 2016) (Fig. S2 A). We found that when BMDMs  
166 were treated with CSF1, overall protein levels of c-Myc and cyclin D1 were upregulated while p27<sup>Kip1</sup> was  
167 reduced (Fig. 4 A). BMDMs treated with LPS showed the opposite result. These changes are consistent  
168 with the existing roles of cell cycle promoters (c-Myc and cyclin D1) and a cell cycle inhibitor (p27<sup>Kip1</sup>) (Liu  
169 et al., 2016; Matsushime et al., 1991). However, surprisingly, we found p21<sup>Waf/Cip1</sup>, a cell cycle inhibitor  
170 (Cazzalini et al., 2010; Dutto et al., 2015; Brugarolas et al., 1999), was strongly induced by both CSF1 and  
171 CAF co-culturing (Fig. 4, B and D). To further investigate this p21 induction, we performed a kinetic study  
172 of p21 expression in BMDMs and found that the p21 protein was induced by CSF1 within 6–12 h, which  
173 was prior to S phase entry at 24–48 h after CSF1 administration, as measured by BrdU (Fig. 4, B and C).  
174 Similar kinetics and cell cycle transit were found when BMDMs were cultured with fibroblasts in a Transwell  
175 assay (Fig. 4, D and E). These data suggest that p21 induction by stoma-derived CSF1 could impact both  
176 macrophage cell cycle and phenotype.

177 To test if p21 induction impacted macrophage phenotype, we knocked-down p21 expression in  
178 BMDMs by siRNA in the presence of CSF1. We found that p21 knockdown resulted in a significant increase  
179 in the number of macrophages that entered S phase, confirming p21's inhibitory role in the G1/S transition  
180 (Fig. S2 B and C). To assess macrophage phenotypic changes after p21 knockdown, we performed gene  
181 profiling analysis followed by RT-qPCR validation of altered gene expressions. Transcription profiling  
182 revealed > 300 genes that were differentially expressed in BMDMs upon p21 knockdown in the presence  
183 of tumor conditioned medium (Fig. 4 F). Overrepresentation analysis of the differentially expressed genes  
184 demonstrated that p21 knockdown in BMDMs resulted in the upregulation of genes involved in cell cycle  
185 progression, as expected, but also unexpectedly, it upregulated interferon  $\alpha$  and  $\gamma$  responses (Fig. 4 G).  
186 RT-qPCR validation also found upregulation of interferon-related genes, IFIT3, CD40, IFN- $\alpha$  and IFN-  
187  $\beta$ . Notably, gene expression of cyclins involved in early cell cycle stage (G1), CCND1, CCNE, were  
188 unchanged, while CCNA, an S phase cyclin, was upregulated (Fig. 4 H). Together, these data suggest that  
189 in addition to its canonical role in regulating S phase entry, p21 might suppress interferon signaling  
190 pathways. In a CSF1-rich TME like PDAC, elevated p21 expression in macrophages might play a prominent  
191 role in impairing tumor immunity (Hervas-Stubbs et al., 2011).

192 Based on the significant presence of CSF1-producing CAFs in the PDAC TME, we hypothesized  
193 that p21 might be chronically high in TAMs and thus might drive their immune-suppressive phenotype. We  
194 first evaluated p21 expression in human PDAC tumors by CyTOF, and found PDAC TAMs frequently  
195 expressed high levels of p21 (Fig. 4 I). Similarly, KPC tumors also had significant numbers of F4/80<sup>+</sup> TAMs

196 expressing high levels of p21 evaluated by mpIHC (Fig. S2, H and I). Finally, scRNAseq analysis suggested  
197 that TAMs from both human and murine PDAC tissues had higher levels of p21 gene expression than  
198 macrophages in normal tissues (Fig. 4 J; Fig. S2 F). The elevation of p21 in PDAC tumors could be a result  
199 of increased number of macrophages entering cell cycle as shown in Figure 1, G and L. However, we  
200 observed in CyTOF, TAMs that were high in p21 expression, were not necessarily high in the expression  
201 of PCNA or Ki67 (Fig. 4 I; Fig. 1 C), suggesting p21 expression was not only up in proliferating TAMs. In  
202 addition, we did not find a significant difference in the p21 protein levels between Ki67<sup>+</sup> vs. Ki67<sup>-</sup> TAMs by  
203 CyTOF, nor did we find significant difference in p21 gene expression in proliferating and non-proliferating  
204 clusters of TAMs in scRNAseq data (Fig. S2, D and G). Collectively, these results suggest that elevated  
205 p21 expression in PDAC TAMs is unlikely to be solely caused by cell cycle entry/progression, it may become  
206 elevated by other factors in the TME and regulate TAMs phenotype.

207 To further assess the potential phenotypic differences in TAMs based on p21 expression, we  
208 generated and analyzed data from four scRNAseq data sets, including one from human (Peng et al., 2019)  
209 and three from PDAC mouse models (Hosein et al., 2019). We identified macrophage populations in each  
210 mouse dataset and myeloid populations in human dataset based on known macrophage markers after  
211 unsupervised clustering and UMAP projection (Fig. 1, F and J; Fig. 3 B). We then stratified macrophages  
212 (myeloid cells in human) based on p21 gene expressions to the p21<sup>High</sup> and p21<sup>Low</sup> grouped in each data  
213 set (Fig. 4 K). Notably, UMAP dimension reduction revealed the similar spatial distributions of p21<sup>High</sup> and  
214 p21<sup>Low</sup> macrophages in tumors from mouse GEMM and orthotopic models, suggesting shared  
215 characteristics among the same group of TAMs in different models (Fig. S2 E). To understand what these  
216 common phenotypes were, we performed Gene Set Enrichment Analysis between p21<sup>High</sup> and p21<sup>Low</sup>  
217 macrophages in each dataset. Across all four datasets and both species, we found that hallmarks typically  
218 associated with the tumor necrosis factor alpha (TNF- $\alpha$ ) signaling pathway, hypoxia, and STAT5 signaling  
219 were upregulated in p21<sup>High</sup> macrophages (p21<sup>High</sup> myeloid cells in human), while oxidative phosphorylation  
220 pathways were upregulated in p21<sup>Low</sup> macrophages (p21<sup>Low</sup> myeloid cells in human) (Fig. 4 L). Although  
221 TNF- $\alpha$  and its signaling pathway are proinflammatory, they are frequently considered immunosuppressive  
222 in tumors. In this respect, TNF- $\alpha$  can mediate T cell exhaustion, CD8<sup>+</sup> T cell death, and expansion of  
223 myeloid-derived suppressor cells and regulatory T cells (T<sub>Regs</sub>) to promote tumor progression and  
224 metastasis (Salomon et al., 2018; Balkwill, 2006). Consistent with the enrichment for TNF- $\alpha$  via the NF- $\kappa$ B  
225 signaling pathway, expressions of IL-1 $\alpha$ , IL-1 $\beta$ , and NF- $\kappa$ B components were also upregulated in p21<sup>High</sup>  
226 macrophages (Fig. 4 M). Together, these data suggest that TAMs with high p21 expression acquire an  
227 inflammatory but potentially immunosuppressive gene signature.

228 PDAC patients are frequently treated with cytotoxic chemotherapies, that can impact both tumor  
229 cells as well as stromal cells. Therefore, we sought to next determine if chemotherapy could impact TAM  
230 proliferation and p21 expression and thus influence TAM-immunosuppressive programs. First, we treated  
231 KPC GEMM with modified FOLFIRINOX (5-FU, Irinotecan, and Oxaliplatin), and analyzed p21<sup>High</sup>F4/80<sup>+</sup>  
232 TAMs 24 hours later by mpIHC. We found that the number of p21<sup>High</sup> TAMs significantly increased after

233 chemotherapy treatment (Fig. 4 N). To determine if this was a direct effect of chemotherapeutic exposure,  
234 we treated BMDMs with four different chemotherapeutics for 24 h and observed similar inductions of p21  
235 (Fig. 4 O). Finally, to assess if this induction of p21 by chemotherapy correlates with changes in  
236 macrophage phenotype, we analyzed TAMs from KPC GEMMs treated with vehicle or gemcitabine and  
237 paclitaxel (GEM/PTX) by scRNAseq. We found striking similarity in the pathways enriched in TAMs from  
238 mice treated with GEM/PTX compared to vehicle and pathways found when we stratified TAMs in vehicle  
239 treatment mice by p21 expression (Fig. 4 P). Similarly, TAMs from GEM/PTX treated KPC mice showed  
240 higher expression of the p21<sup>High</sup> gene signature when compared to vehicle. (Fig. S2 J). These data  
241 suggested that p21 was induced by both stromal interaction and amplified by chemotherapy treatment, and  
242 correlated with inflammatory and likely immunosuppressive phenotypes in PDAC TAMs. Next, we analyzed  
243 the p21<sup>High</sup> TAM signature in TCGA data sets and found strong correlation with signatures of “T cell  
244 exhaustion” (Tirosh et al., 2016) and “immune escape” (Lin et al., 2007) (Fig. 4 Q). Additionally, the p21  
245 signature strongly correlated with CSF1 expression (Fig. 4 Q). These data suggest that stromal-CSF1  
246 induced p21 expression in TAMs may drive dysfunctional T cell mediated tumor control.

247

#### 248 **Expression of p21 drove the tumor promoting phenotype in macrophages.**

249 To better understand the impact of induction of p21 expression on the macrophage phenotype, and  
250 on the PDAC TME, we engineered a mouse designed to constitutively express p21 in myeloid cells. The  
251 construct contained the *p21* gene under the control of a CAG promoter and a lox-stop-lox case.  
252 Downstream of the *p21* gene, the construct also contained an internal ribosome entry site (IRES) and YFP  
253 gene for visualization. The construct was then integrated into the ROSA locus of pure C57/B6 mice (ROSA-  
254 CAG-LSL-p21-IRES-YFP, p21<sup>+wt</sup>) (Fig. 5 A). Then, p21<sup>+wt</sup> mice were crossed with LysMCre mice to  
255 specifically induce p21 expression in macrophages. The resulting LysM<sup>+/+</sup>/p21<sup>+wt</sup> mice were termed “p21  
256 constitutive expression” (p21<sup>CE</sup>) mice.

257 To confirm that p21 expression was induced in macrophages from p21<sup>CE</sup> mice, we measured p21  
258 protein levels in BMDMs from p21<sup>CE</sup> mice in the presence and absence of CSF1. We found BMDMs from  
259 p21<sup>CE</sup> mice expressed significantly higher levels of p21 protein in the absence of CSF1 compared to control  
260 BMDMs (Fig. 5 B). However, in the presence of CSF1, which strongly induced p21 expression in wildtype  
261 BMDMs (Fig. 4, A and B), both p21<sup>CE</sup> and p21<sup>WT</sup> BMDMs had similar p21 expressions. These data indicated  
262 that macrophages from the p21<sup>CE</sup> mouse model retained high p21 expression without stimuli and that the  
263 expression was at a physiological level comparable to CSF1 exposure or fibroblast co-cultures.

264 Given LysMCre is known to be expressed in various myeloid compartments, including granulocytes  
265 and monocytes (Abram et al., 2014), we next examined whether the hematopoietic system was altered in  
266 p21<sup>CE</sup> mice. Flow cytometry analysis of non-tumor-bearing p21<sup>CE</sup> mice revealed that YFP, a surrogate for  
267 transgenic p21, was mainly expressed in mature monocytes, macrophages, and granulocytes/neutrophils  
268 in the blood, bone marrow, spleen, and pancreas, but minimally expressed in bone marrow progenitors and  
269 lymphocytes (Fig. 5 C). Corresponding to the lack of expression in progenitor cells, we did not find major



270 changes in the cellular composition of bone marrow or blood in p21<sup>CE</sup> mice compared to controls, as  
271 assessed by flow cytometry or by complete blood count analysis (Fig. 5 D; Fig. S3, A, B and C). Taken  
272 together, these data suggested that p21 was expressed mainly in mature myeloid cells in p21<sup>CE</sup> mice, but  
273 minimal in progenitors and it did not greatly impact hematopoiesis.

274 As shown above in the scRNAseq data and gene profiling analysis after p21 siRNA knockdown,  
275 p21 expression regulated the macrophage phenotype. To assess whether macrophages from p21<sup>CE</sup> mice  
276 had similar phenotypic changes, we profiled gene expressions of BMDMs from p21<sup>WT</sup>, p21<sup>CE</sup>, and p21<sup>-/-</sup>  
277 (Jax mice) mice in the presence of CSF1. We found that inflammatory cytokines/chemokines, CXCL1,  
278 CXCL2, IL-1 $\alpha$ , IL-1 $\beta$ , IL-6, and TNF- $\alpha$  were upregulated in p21<sup>CE</sup> mice but reduced or not changed in p21<sup>-/-</sup>  
279 <sup>-/-</sup> mice (Fig. 5 E). In addition, the interferon regulatory factor 4 (IRF4)-mediated macrophage alternative  
280 activated genes, YM1 and transforming growth factor beta (TGF- $\beta$ ), were also upregulated. In contrast, p21<sup>-/-</sup>  
281 <sup>-/-</sup> BMDMs had elevated levels of the interferon-related genes, IRF1, BATF, IFIT3 and CD40, which were  
282 consistent with the changes in macrophages with siRNA-mediated knockdown of p21 (Fig. 5 E and Fig. 4  
283 H). Taken together, these data suggest that constitutive p21 expression regulates the macrophage  
284 phenotype and represses anti-tumor immunity.

285 Next, we examined the impact of constitutive p21 expression in myeloid cells on PDAC progression.  
286 We orthotopically implanted KP-2 cells into p21<sup>CE</sup> and p21<sup>WT</sup> mice and analyzed tumors at the end point by  
287 flow cytometry. Similar to YFP expression patterns in non-tumor-bearing mice, we found in PDAC tissues  
288 that the majority of TAMs, monocytes, and neutrophils were YFP<sup>+</sup>, but the vast majority of tumor infiltrating  
289 cDCs, lymphocytes, and bone marrow progenitors were YFP<sup>-</sup> (Fig. 5 F). Corresponding to lack of expression  
290 in DCs, we found no major changes in the numbers of cDC1s and cDC2s in pancreatic tissues from p21<sup>CE</sup>  
291 tumor-bearing mice (Fig. S3 D). Additionally, the number of other myeloid cells that were not largely  
292 dependent on proliferation was also not changed in p21<sup>CE</sup> when compared to p21<sup>WT</sup> (Fig. S3, D - F). With  
293 constitutive expression of p21, we found a reduction in TAM proliferation, as measured by BrdU, as well as  
294 a decrease in total TAM numbers (Fig. 5, G and H). These data suggest that local proliferation of TAMs is  
295 necessary to sustain a local TAM pool. Interestingly, while TAM depletion in other studies typically slowed  
296 tumor growth (Zhu et al., 2014; Borgoni et al., 2018; Candido et al., 2018), we saw a significant increase in  
297 tumor burden in p21<sup>CE</sup> mice (Fig. 5 I). These data suggest that changes in myeloid phenotype mediated  
298 by p21 drives tumor progression. Before evaluating the phenotypic changes of TAMs in p21<sup>CE</sup> mice, we  
299 examined the tumor promoting effects on other tumor models. Similar to orthotopic KP-2, the PDA.69 PDAC  
300 model (Lee et al., 2016) and PyMT mammary tumor model showed decreased TAM proliferations and  
301 numbers, but accelerated tumor progression (Fig. 5, J and K). Together, these data suggest that constitutive  
302 expression of p21 in myeloid cells reduces TAM proliferations and numbers, but also alters TAM phenotype  
303 to drive tumor progression.

304  
305  
306

307 **The p21 expression in macrophages led to an inflammatory but immunosuppressive phenotype.**

308 We next sought to explore how high p21 expression in myeloid cells affected their phenotype *in*  
309 *vivo*. We conducted scRNAseq analyses on sorted CD45<sup>+</sup> cells from PDAC tissues in p21<sup>WT</sup> and p21<sup>CE</sup>  
310 mice. An unsupervised clustering algorithm identified 19 clusters (Fig. S4 A), which mainly included C1qa-  
311 expressing macrophages, Ly6C2-expressing monocytes, S100a8-expressing granulocytes, Cd3d-  
312 expressing T cells, and Ms4a1-expressing B cells (Fig. 6 A; Fig. S4 B). To assess transgene expression,  
313 we analyzed the expression of YFP sequences. Consistent with flow cytometry data, myeloid  
314 compartments, including macrophages, monocytes, neutrophils, and eosinophils had high YFP  
315 expressions, while DCs had minimal and non-myeloid cells had no expression (Fig. 6 B).

316 To more accurately define myeloid subpopulations identified by scRNAseq and evaluate the  
317 phenotypic changes in each, starting from TAMs, we computationally separated macrophage/monocyte  
318 clusters and reanalyzed these at a higher resolution. This approach generated 17 clusters, which were  
319 grouped into four major populations, including macrophages with high MHCII expression (MHCII<sup>hi</sup> Macs),  
320 low MHCII expression (MHCII<sup>low</sup> Macs), monocytes (Mono, Mono2), and proliferating macrophages  
321 (ProMacs) (Fig. 6 C). After identifying major macrophage subsets, we first performed cell cycle analysis on  
322 all macrophages and confirmed that their proliferations were reduced (Fig. 6 D). Second, we observed that  
323 a higher percentage of TAMs in p21<sup>CE</sup> was in the MHCII<sup>low</sup> cluster, and that this change was also observed  
324 at the protein level by flow cytometry (Fig. 6, E and F), indicating that TAMs in p21<sup>CE</sup> potentially had impaired  
325 cross-presentation. Third, we performed Gene Set Enrichment Analysis (GSEA) between p21<sup>CE</sup> TAMs and  
326 p21<sup>WT</sup> TAMs and found that consistent with *in vitro* experiments, TAMs in p21<sup>CE</sup> were enriched in TNF- $\alpha$   
327 signaling, as well as pathways associated with hypoxia and inflammatory responses (Fig. 6H; Fig. S5 A).  
328 Notably, we also observed downregulation of genes associated with antigen processing and presentation  
329 of H2-Aa, H2-Ab1, H2-Eb1, and Cd74, and with the complement components of C1qa, C1qb, and Lyz,  
330 whereas tissue remodeling markers of Arg1, Mmp19, Vegfa, and Mmp9 were upregulated in TAMs from  
331 p21<sup>CE</sup> tumor-bearing mice (> 1.5-fold, adjusted p < 0.05) (Fig. 6 I). Taken together, these data suggest that  
332 TAMs in p21<sup>CE</sup> are more inflammatory, characterized by high TNF- $\alpha$  signaling, and are more  
333 immunosuppressive, characterized by both impaired anti-tumor functions and expressions of M2-like gene  
334 signatures. In addition, we found an increase of eosinophils within the TME of PDAC from p21<sup>CE</sup> tumor-  
335 bearing mice (Fig. S4 C), which further illustrated that the TME was more inflammatory.

336 To further confirm that the p21<sup>CE</sup> model recapitulated the characteristics of p21<sup>High</sup> TAMs identified  
337 in mouse PDAC tissues in Fig. 4 K, we examined the expression levels of p21<sup>High</sup> gene signature defined  
338 in Fig. 4 M in TAMs from p21<sup>CE</sup> and p21<sup>WT</sup> tumor-bearing mice. We found that TAMs in p21<sup>CE</sup> expressed  
339 significantly higher levels of the p21<sup>High</sup> gene signatures (Fig. S4 D). In addition, a gene encoded for the  
340 common  $\gamma$  chain of the FC receptor (*Fcer1g*) was significantly reduced in p21<sup>High</sup> TAMs across three mouse  
341 scRNAseq datasets in Fig. 4 M. Cross-linking of Fc $\gamma$ Rs and the common  $\gamma$  chain is required for IgG-  
342 mediated response and phagocytosis (Castro-Dopico and Clatworthy, 2019). Therefore, we evaluated  
343 whether p21<sup>CE</sup> macrophages had impaired Fc $\gamma$ R-mediated phagocytosis. We cultured BMDMs from p21<sup>CE</sup>

344 or p21<sup>WT</sup> non-tumor-bearing mice with IgG-coated beads and found significantly less phagocytosis in p21<sup>CE</sup>  
345 BMDMs (Fig. 6 G). These data suggest TAMs with high p21 expression have impaired effector functions  
346 which could contribute to tumor progression. Finally we analyzed a gene expression signature derived from  
347 TAMs in p21<sup>CE</sup> mice in human PDAC expression datasets. Our analysis found that the p21<sup>CE</sup> signature was  
348 also associated with “immune escape” signatures (Lin et al., 2007) and poor progression free survival (Fig.  
349 6, J and K).

350 To understand the changes in other myeloid cells from p21<sup>CE</sup> mice, we compared the numbers of  
351 significantly changed genes in each myeloid population between the two genotypes. We found that TAMs  
352 showed the largest number of differentially expressed genes (DEGs) (80 genes), followed by monocytes  
353 (34 genes), and only a few genes in neutrophils and granulocytes (Fig. S4 F). These data suggest  
354 macrophages are likely the predominant driver of tumor burden differences. To confirm macrophage  
355 contribution to the tumor difference between the two genotypes, we administered  $\alpha$ CSF1 IgG and  
356 clodronate-containing liposomes to p21<sup>CE</sup> and p21<sup>WT</sup> tumor-bearing mice throughout tumor development.  
357 We found that the number of TAMs was significantly reduced, while the number of monocytes did not after  
358 the treatment in both genotypes of mice (Fig. S4, I and J). Only in the setting of macrophage depletion were  
359 the tumor promoting effects observed in p21<sup>CE</sup> mice abolished (Fig. S4 H). Therefore, these data suggest  
360 that macrophages are the main driver for tumor acceleration in p21<sup>CE</sup> mice.

361 Although YFP was not significantly expressed by DCs, DCs play a critical role in antigen processing  
362 and presentation as well as CD8<sup>+</sup> T cell activity and could potentially affect tumor progression (Gardner and  
363 Ruffell, 2016). To evaluate the changes in DCs in p21<sup>CE</sup> tumors, we reclustered DC populations from  
364 scRNAseq data at a higher resolution and identified seven major subsets: cDC1, cDC2a, cDC2b, migratory  
365 DC (MigDC), pDC, and proliferating cDC1 and cDC2 (Fig. S4 E). The cDC1 expressed classical DC1  
366 markers of *Xcr1*, *Clec9a*, and also *Baft3* and *Irf8*, while the cDC2 subsets expressed *Cd11b*, *Irf4*, and *Sirpa*,  
367 and were further separated into cDC2a and cDC2b based on *Epcam* expression (Merad et al., 2013;  
368 Kaplan, 2017). We did not observe significant changes in the percentages of cDC1s, cDC2s, migratory  
369 DCs, and proliferating DCs as the total number of DCs between two genotypes, nor did we observe a  
370 change in genes associated with cross-presentation. We saw a decrease in pDCs and an increase of  
371 cDC2bs as the percentage of total DCs (Fig. S4 F). Because pDCs are one of the major producers of type-  
372 I interferon (Koucký et al., 2019) and could potentially drive anti-tumor immunity, this reduction could impact  
373 tumor immune suppression.

374

### 375 **The p21 expression in macrophages impaired effector T cells.**

376 To determine if impaired antigen processing and presentation in macrophages directly affected T  
377 cell numbers and functions, we reanalyzed T cell clusters from the scRNAseq experiment at a higher  
378 resolution. Unsupervised clustering generated 12 clusters and were manually assigned into natural killer  
379 cells (NK cells), regulatory T cells (T<sub>Regs</sub>), two clusters of CD4<sup>+</sup> (CD4#1 and CD4#2), two clusters of CD8<sup>+</sup>  
380 (CD8#1 and CD8#2), double negative T cells (DNs), and a gamma delta T cell based on known cell type

381 markers (Fig. 7 A). Among CD8<sup>+</sup> T cells, cluster #2 expressed the higher effector genes, *Gzma*, *Gzmb*, and  
382 *Cd74*, and therefore was considered as cytotoxic effectors (Fig. 7 A). We observed that this CD8<sup>+</sup> effector  
383 cluster was reduced as a percentage in p21<sup>CE</sup> tumor-bearing mice (Fig. 7 B) and the expressions of effector  
384 genes, *Gzma*, *Gzmk*, *Klrg1*, were also significantly lower (Fig. 7 D). In contrast, we saw an increase in the  
385 percentage of CD4#2 T cell populations, which are T<sub>H</sub>2 polarized, with high levels of *Gata3*, *IL-4* and *IL-13*  
386 (Fig. 7 B) (Zheng and Flavell, 1997). If mapping the upregulated genes in cytotoxic CD8<sup>+</sup> T cells from p21<sup>CE</sup>  
387 tumors to known signaling pathways, we found enrichment in apoptosis and IL-2-STAT5 signaling,  
388 suggesting overexpressed p21 in macrophages may cause more cytotoxic CD8<sup>+</sup> T cell death (Fig. 7 C). To  
389 confirm this, we co-cultured activated CD8<sup>+</sup> T cells with BMDMs generated from p21<sup>CE</sup> and p21<sup>WT</sup> mice *in*  
390 *vitro*, and found p21<sup>CE</sup> BMDMs led to more apoptosis of CD8<sup>+</sup> T cells, measured by 7-AAD (Fig. 7 E). To  
391 extend the findings to human PDAC patients, we analyzed the correlations between the p21<sup>CE</sup> signature in  
392 TAMs with “T cell exhaustion”(Tirosch et al., 2016) and found strong positive correlations (Fig. 7 K). Taken  
393 together, these data suggest high p21 expression in TAMs dampens cytotoxic CD8<sup>+</sup> T cell mediated tumor  
394 control.

395 To corroborate these findings, we used a T cell-focused CyTOF panel. CD45<sup>+</sup>TCRb<sup>+</sup>CD90<sup>+</sup>NK1.1-  
396 TCR $\gamma\delta$ T<sup>-</sup> cells were selected for further clustering based on 20 T cell functional markers. This approach  
397 generated 18 clusters that could be mainly grouped into three major populations: CD4<sup>+</sup> T cells, regulatory  
398 CD4<sup>+</sup> T cells (T<sub>Regs</sub>), and CD8<sup>+</sup> T cells (Fig. 7, F and G). We next evaluated changes in each subpopulation  
399 and found a significant decrease in the numbers of cytotoxic effectors (cluster 4), which expressed high  
400 levels of granzyme B and KLRG1. In addition, we observed an expansion of the CD4<sup>+</sup>T<sub>reg</sub> (cluster 5) that  
401 expressed high levels of PD1 (Fig. 7 H). In addition, we found that CD8<sup>+</sup> T cells as a whole in p21<sup>CE</sup> tumors  
402 expressed lower levels of KLRG1 and CD90, but higher levels of CD44, Tim3, and PD1, indicating a more  
403 exhausted and less functional phenotype (Fig. 7 I). Finally, to determine whether accelerated tumor  
404 progression in p21<sup>CE</sup> mice was driven by T cells, we depleted CD4<sup>+</sup> and CD8<sup>+</sup> T cells in both p21<sup>CE</sup> and  
405 p21<sup>WT</sup> mice through injection of  $\alpha$ CD4 IgG and  $\alpha$ CD8 IgG. We no longer observed difference in tumor  
406 burdens between the two groups (Fig. 7 J). These data suggest that p21-driven TAM immunosuppressive  
407 phenotype not only reduces the number of anti-tumor T cells but also impairs the functions of remaining T  
408 cells.

409 We next asked whether innate immune agonist therapy, CD40 agonist, could reeducate TAMs and  
410 restore their effector functions (Coveler et al., 2020). To test this, we treated p21<sup>CE</sup> and p21<sup>WT</sup> mice bearing  
411 orthotopic KP-2 tumors with CD40 agonist therapy and found that while the dual treatment had limited effect  
412 on p21<sup>WT</sup> mice, it dramatically reduced the tumor burden in p21<sup>CE</sup> mice (Fig. 7 L). These data suggest,  
413 although stromal or chemo-induced p21 expression drives an inflammatory and immunosuppressive  
414 phenotype in TAMs, these same pathways may make tumor uniquely susceptible to CD40 agonist therapy.

415  
416

## 417 **Discussion**

418 Macrophage proliferation has been observed in several non-cancer pathological conditions,  
419 including helminth infections (Jenkins et al., 2011), atherosclerosis (Tang et al., 2015), and obesity-  
420 associated adipose tissues (Amano et al., 2014). In these conditions, proliferation of macrophages, albeit  
421 under the control of different factors, is necessary to sustain total macrophage numbers at each tissue site.  
422 In our studies, we found in pancreatic tumors that macrophage proliferation was mainly driven by CAF-  
423 derived CSF1. These data implied that although the general need for macrophage expansion was common,  
424 the activated signaling pathways and resulting macrophage phenotypes were largely tissue- and context-  
425 dependent. Stromal rich tumors may increase TAM numbers more frequently by local proliferation.  
426 Interestingly, CSF1 levels were reported to be higher in the blood of patients suffering from melanoma,  
427 breast cancer, or pancreatic cancer. In these patients and also in corresponding mouse models,  
428 macrophages were found to be proliferative (Bottazzi et al., 1990; Franklin et al., 2014; Tymoszuk et al.,  
429 2014). These data suggested that CSF1-driven macrophage proliferation was common in multiple cancer  
430 types.

431 An earlier study examined the CSF1 effects on CSF1R-expressing human breast cancer cell lines,  
432 and found that CSF1 inhibited cell proliferation through inducing p53 independent, but MAPK-dependent,  
433 p21 expression (Lee et al., 1999). This result may seem contradictory to ours as we showed CSF1 induced  
434 BMDM proliferation. However, we also showed that knocking-down p21 expression or constitutively  
435 expressing it promoted or inhibited macrophage proliferation. These data suggested that CSF1 induction  
436 of p21 in macrophages acted as a checkpoint for S phase entry. The ultimate cell cycle transit required  
437 additional signaling, and the signals could be synthesized according to the expression level of p21. One  
438 group reported that Raf signal intensity determined either induction of DNA synthesis or inhibition of  
439 proliferation in fibroblasts by p21<sup>Cip1</sup> expression levels (Sewing et al., 1997). A recent study further showed  
440 that p21 not only determined the cell cycle fate of mother cells but could also be carried into daughter cells  
441 and regulated the proliferation after mitosis (Yang et al., 2017). Therefore, it is not surprising that the p21  
442 expression level is known to protect cells from chemotherapy-induced apoptosis (Hsu et al., 2019).

443 Aside from p21's canonical role as a cell cycle checkpoint, several groups reported its role in  
444 regulating inflammation, with some contradictory results. One group demonstrated that p21<sup>-/-</sup> mice were  
445 more sensitive to LPS-induced septic shock due to inflammation (Trakala et al., 2009). Likewise, p21<sup>-/-</sup> mice  
446 showed enhanced experimental inflammatory arthritis and severe articular destruction (Mavers et al.,  
447 2012). Contrastingly, in a serum transfer model of arthritis, p21<sup>-/-</sup> mice were more resistant (Scatizzi et al.,  
448 2006). Furthermore, disruption of p21 attenuated lung inflammation in mice (Yao et al., 2008). These data  
449 suggested that regardless of whether p21 promoted or inhibited inflammation, it was established that p21  
450 regulated inflammation. In a chronic pancreatitis model, one study found that p21 expression was  
451 significantly increased overall, while knocking-down its expression resolved inflammation and prevented  
452 pancreatic injury through reducing the release of NF- $\kappa$ B-mediated proinflammatory cytokines, such as TNF-  
453  $\alpha$ , IL-6, and CXCL1 (Seleznik et al., 2018). These data suggested that at least in the pancreas, p21 played

454 a role in promoting inflammation, independent of KRAS mutations that are commonly observed in PDAC  
455 and are known to drive inflammation (Kitajima et al., 2016). However, this study did not identify the main  
456 drivers for p21-mediated inflammation.

457 Macrophages are known to exhibit plasticity, which gives them the capability to quickly respond to  
458 environmental challenges. Expression levels of p21 could be an important regulator in macrophage  
459 plasticity. Expression of p21 inhibited macrophage activation during LPS-induced septic shock, as p21<sup>-/-</sup>  
460 macrophage expressed higher levels of CD40 and enhanced activation of NF- $\kappa$ B (Trakala et al., 2009).  
461 One study further demonstrated that expression of p21 acted more like a buffer system for inflammation as  
462 it could adjust the equilibrium between p65-p50 and p50-p50 NF- $\kappa$ B pathways to mediate macrophage  
463 plasticity in LPS treatment (Rackov et al.). However, none of these studies investigated p21 effects on  
464 macrophage polarization in tumor settings. From scRNAseq data, we showed that stratifying macrophages  
465 based on p21 expressions into p21<sup>Hi</sup> and p21<sup>Low</sup> resulted in two phenotypically distinct macrophages  
466 independent of the cell cycle, with the first being more inflammatory. TNF- $\alpha$  and NF- $\kappa$ B were upregulated  
467 when p21 expression was high, which is consistent with previous findings. We further illustrated that  
468 constitutive expression of p21 in macrophages impaired their phagocytosis capabilities *in vitro*, lowered  
469 expression of genes associated with antigen cross-presentation in orthotopic PDAC tumors, and hindered  
470 cytotoxic T cell functions, which eventually led to faster tumor progression. These observations are  
471 important because as we showed both stromal interaction and therapeutic interventions targeting cell cycle  
472 could induce p21 expression in TAMs and lead to an inflammatory yet immunosuppressive phenotype.  
473 Given TAMs are usually abundant in TME, these p21-driven phenotypic changes could eventually lead to  
474 resistance for treatments.

475 We also found that in human and mouse PDACs, although p21 expression was highest in  
476 macrophages, it was expressed by other myeloid populations. If p21 regulates inflammatory responses  
477 through NF- $\kappa$ B in macrophages, it is possible that other immune cells mediate inflammation, like  
478 granulocytes and neutrophils, which could also be polarized by p21 in a similar way. One group observed  
479 that p21 expression in neutrophils regulated inflammation in infections (Martin et al., 2016). In addition, we  
480 observed that p21 expression was induced by chemotherapy not only in macrophages, but also in other  
481 myeloid cells, which suggested that inflammatory but immunosuppressive phenotypes could be further  
482 strengthened by myeloid cells, in addition to macrophages.

483 Understanding how the TME and cancer cell intrinsic factors regulate macrophage tumor  
484 supportive vs. tumor suppressive functions is critical to therapeutically targeting TAMs in cancer patients.  
485 In total, our data suggested that CAF-induced macrophage proliferation was important for sustaining TAM  
486 number and induction of p21, which also resulted in immunosuppression and tumor progression. Lastly,  
487 expression of p21 in TAMs might sensitize tumors to CD40 agonist treatment.

488  
489  
490

491 **Materials and methods**

492 **Contacts for reagent and resource sharing**

493 Further information and requests for resources and reagents should be directed to and will be fulfilled by  
494 the lead contact, David G. DeNardo ([ddenardo@wustl.edu](mailto:ddenardo@wustl.edu)).

495

496 **Murine PDAC models**

497 Mice were maintained in the Laboratory for Animal Care barrier facility at the Washington University School  
498 of Medicine. All studies were approved by the Washington University School of Medicine Institutional Animal  
499 Studies Committee.

500 KPC mice (p48-Cre;Kras<sup>LSL-G12D</sup>;Trp53<sup>fl/fl</sup>) used in these studies have been rapidly bred to the  
501 C57Bl/6J background in our laboratory using speed-congenics and further backcrossed more than five  
502 times. All mice were housed, bred, and maintained under specific pathogen-free conditions in accordance  
503 with NIH-AALAC standards and were consistent with the Washington University School of Medicine IACUC  
504 regulations (protocols #20160265 and #19-0856).

505 The KP-1 cell line was derived from PDAC tissues of the 2.2-month-old p48-CRE<sup>+</sup>/LSL-  
506 Kras<sup>G12D</sup>/p53<sup>fl/fl</sup> (KPC); the KP-2 cell line was derived from the 6-month-old p48-CRE<sup>+</sup>/LSL-  
507 Kras<sup>G12D</sup>/p53<sup>fl/+</sup> mice (KP<sup>fl/+C</sup>) (Jiang et al., 2016). The KI cell line was derived from the Pdx1-Cre;LSL-  
508 Kras<sup>G12D</sup>;Ink/Arf<sup>fl/fl</sup> as previously described (Mitchem et al., 2013). Cells were grown on collagen-coated  
509 tissue culture flasks for < 12 passages, and were tested for cytokeratin-19, smooth muscle actin, vimentin,  
510 and CD45 to verify their carcinoma identity and purity. The PDA.69 cell line was a kind gift from Dr. Gregory  
511 L. Beatty, and was maintained in tissue culture flasks with DMEM supplemented with 1% glutamax and  
512 0.167% gentamycin for less than 13 passages. To establish orthotopic PDAC models, either 50,000 or  
513 200,000 KP-2 cells, and 10,000 or 50,000 PDA.69 cells in 50  $\mu$ L of Cultrex (Trevigen, Gaithersburg, MD,  
514 USA) were injected into the pancreas of 8–12-week-old C57BL/6 mice or transgenic mice according to  
515 published protocols (Kim et al., 2009). Tumor-bearing mice were sacrificed when the palpable tumor size  
516 was > 1 cm (21–27days).

517

518 **Other mouse models**

519 The p21<sup>CE</sup> mouse was developed at the Washington University Mouse Embryonic Stem Cell Core using  
520 the construct of Cdkn1a (p21, accession #NM\_007669). Briefly, the construct contained the p21 gene under  
521 the control of a CAG promoter and a lox-stop-lox case. Downstream of the p21 gene, the construct also  
522 contained an internal ribosome entry site (IRES) and YFP gene for visualization. The construct was then  
523 integrated into the ROSA locus of pure C57/B6 mice (ROSA-CAG-LSL-p21-IRES-YFP) and injected into  
524 C57 blastocyst (p21<sup>+/<sup>wt</sup></sup>). Successful chimeras were selected and verified by DNA sequencing across ROSA  
525 junctions (primers are listed in Table S2) and subsequent founder mice were identified via genomic PCR  
526 (primers are listed in Table S2). Then, p21<sup>+/<sup>wt</sup></sup> mice were crossed with LysMCre mice to specifically induce

527 p21 expression in macrophages. The resulting LysM<sup>+/+</sup>/p21<sup>+/wt</sup> mice are termed “p21 constitutive  
528 expression” (p21<sup>CE</sup>) mice.

529

### 530 **Tissue harvest**

531 Mice were euthanized by intracardiac perfusion with 15 mL of phosphate-buffered saline (PBS)-heparin  
532 under isoflurane anesthesia. Blood was obtained by cardiac puncture and deposited in heparin-PBS (Alfa  
533 Aesar Lonza, Haverhill, MA, USA) solution. Blood was then incubated in red blood cell lysis buffer  
534 (Biolegend, San Diego, CA, USA) for 10 min on ice and quenched with 1% fetal bovine serum (FBS; Atlanta  
535 Biologicals, Flowery Branch, GA, USA) containing PBS. Normal and tumor tissues were manually minced  
536 and digested in 20 mL of Hank’s Balanced Salt Solution (Thermo Fisher Scientific, Waltham, MA, USA)  
537 supplemented with 2 mg/mL of collagenase A (Roche, Basel, Switzerland) and 1× DNase I (Sigma-Aldrich,  
538 St. Louis, MO, USA) for 30 min (20 min for normal tissue) at 37°C with agitation. After digestion, the cell  
539 suspensions were quenched with 5 mL of PBS and filtered through 40 µm nylon mesh. The filtered  
540 suspensions were then pelleted by centrifugation (1,800 rpm for 4 min at 4°C) and resuspended in flow  
541 cytometry buffer [PBS containing 1% bovine serum albumin (BSA) and 5 mM EDTA] as a single cell  
542 suspension.

543

### 544 **Flow cytometry**

545 Following tissue digestion, single cell suspensions were blocked with rat anti-mouse CD16/CD32 antibodies  
546 (eBioscience, Waltham, MA, USA) for 10 min on ice, and pelleted by centrifugation. The cells were  
547 subsequently labeled with 100 µL of fluorophore-conjugated anti-mouse extracellular antibodies at  
548 recommended dilutions for 30 min on ice in flow cytometry buffer. Intracellular staining was conducted using  
549 eBioscience Transcription Factor Staining Buffer using the manufacturer’s recommended procedures. All  
550 antibodies are listed in Table S3. For live analysis of YFP, fluorophore-labeled cells were analyzed  
551 immediately without fixation on X-20 cytometers.

552 For proliferation assays, mice were injected with BrdU, 1 mg i.p. at 3 h prior to sacrifice. A BD  
553 Biosciences Cytfix/Cytoperm kit (BD Biosciences, San Jose, CA, USA) was used following extracellular  
554 staining to stain for BrdU.

555

### 556 **Human samples**

557 Human PDAC samples were obtained from consenting patients diagnosed at Washington University and  
558 the Siteman Cancer Center. Patients underwent pancreaticoduodenectomy. The Washington University  
559 Ethics committee approved the study under IRB protocol #201704078.

560

### 561 **Mass cytometry**

562 Human tumor samples were collected on different days right after surgery and digested in Hank’s Balanced  
563 Salt Solution supplemented with 2 mg/mL collagenase A (Roche), 2.5 U/mL hyaluronidase (Sigma-Aldrich),



564 and DNase I at 37°C for 30 min with agitation to generate single cell suspensions. Cell suspensions were  
565 counted and stained in 5 µM cisplatin per million cells for exactly 3 min on ice and washed with Cy-FACS  
566 buffer (PBS, 0.1% BSA, 0.02% NaN<sub>3</sub>, and 2 mM EDTA) twice. The cells were then incubated with FcR  
567 blocking reagent plus surface-antibody cocktail for 40 min on ice. After incubation, surface marker-stained  
568 cells were washed twice with Cy-FACS buffer. Cells were then fixed with 4% paraformaldehyde (PFA) for  
569 10 min on ice and permeabilized with permeabilization buffer containing the intracellular stain cocktail  
570 (Invitrogen, Carlsbad, CA, USA) for 40 min. All antibodies are listed in Table S5. The cells were then washed  
571 and fixed a second time in 4% PFA in PBS at 4°C at least overnight. One day prior to acquisition, the cells  
572 were washed twice and stained with 200 µL of DNA intercalator per million cells. Cells were acquired on a  
573 CyTOF2 mass cytometer (South San Francisco, CA, USA) and were normalized with the MATLAB  
574 normalizer (v.7.14.0.739 run in MATLAB R2012a) (Finck et al., 2013). The normalized data were uploaded  
575 into Cytobank and manually gated to exclude normalization beads, cell debris, dead cells, doublets, and  
576 CD45<sup>-</sup> cells. The filtered sample from each individual specimen was then exported and batch normalized  
577 by the date of acquisition using the R Cydar package NormalizeBatch function (mode = "range") to compute  
578 a quantile function from the pooled distribution of the input expression data (Lun et al., 2017). In brief, batch  
579 expression was scaled between the upper and lower bounds of the pooled reference distribution, with zero  
580 values fixed at zero. A total of 10,245 events per batch of corrected sample was then visualized using the  
581 standard t-SNE algorithm in Cytobank. Populations of interest were manually gated and verified based on  
582 lineage marker expressions.

583 For mouse samples in Fig. 7 F-I, seven mice per group were individually stained for surface and  
584 intracellular stains (the antibodies are listed in Table S6), and fixed overnight as described above. Each  
585 sample was then barcoded with a unique combination of palladium metal barcodes using the  
586 manufacturer's instructions (Fluidigm). Following bar coding, the cells were pooled together and incubated  
587 overnight in 2% PFA containing 40 nM iridium nucleic acid intercalator (Fluidigm). On the day of acquisition,  
588 the barcoded samples were washed and suspended in water containing 10% EQ Calibration Beads  
589 (Fluidigm) before acquisition on a CyTOF2 mass cytometer (Fluidigm). Sample barcodes were interpreted  
590 using a single cell debarcoder tool (Zunder et al., 2015). FCS files were then uploaded to Cytobank and  
591 manually gated to exclude normalization beads, cell debris, dead cells, and doublets. Classical T cells were  
592 classified as CD45<sup>+</sup>, Cisplatin<sup>-</sup>, Thy1.2<sup>+</sup>, NK1.1<sup>-</sup>, TCRgd<sup>-</sup>, and TCRb<sup>+</sup>. All T cells were exported as new FCS  
593 files and analyzed using the R CATALYST package (Nowicka et al., 2017) in R, version 3.8.2 (The R Project  
594 for Statistical Computing, Vienna, Austria). In brief, FCS files were down-sampled to equivalent cell counts,  
595 before clustering with the R implementation of the Phenograph algorithm (Levine et al., 2015). All markers  
596 were used for clustering analysis except markers used for T cell gating (see above). Dimensional reduction  
597 and visualization were performed using the UMAP algorithm (McInnes et al., 2020). Finally, differential  
598 cluster abundance testing was performed with the R diffcyt package, utilizing a generalized linear mixed  
599 model (Weber et al., 2019).

600

## 601 **Macrophage depletion**

602 In Fig. 3 F, 8–12-week-old C57BL/6 mice were orthotopically implanted with 200,000 KP-2 cells. When the  
603 tumor was palpable, mice were intraperitoneally treated with one dose of 1 mg CSF1 neutralizing antibody  
604 (clone 5A1; BioXCell, Lebanon, NH, USA) and sacrificed at 12 and 24 h after treatments.

605 In Fig. S4, H - J, to deplete tissue resident macrophages, 8–12-weeks-old p21<sup>CE</sup> and p21<sup>WT</sup> mice  
606 were implanted orthotopically with 50,000 KP-2 cells on day 0, then were treated with three doses of CSF1  
607 neutralizing antibody (1 mg, 0.5 mg, and 0.5 mg on days 3, 10, and 17) and two doses of clodronate-  
608 containing liposomes (200  $\mu$ L each on days 5 and 12). Control mice were treated with the same  
609 doses/volumes of IgG (clone HRPN, BioXCell) and PBS liposomes.

610

## 611 ***In Vitro* co-culture and siRNA treatment**

612 All cell lines were maintained in DMEM (Lonza, Basel, Switzerland) supplemented with 10% FBS (Atlanta  
613 Biological) and penicillin/streptomycin (Gibco, Gaithersburg, MD, USA). All cell lines tested negative for  
614 mycoplasma.

615 Pancreatic fibroblasts were harvested from the pancreas of healthy 8-week-old C57BL/6 mice,  
616 passaged three times on tissue culture plates, and tested negative for mycoplasma. An immortal pancreatic  
617 fibroblast cell line was established by passage more than 18 times. Soluble factors in primary pancreatic  
618 fibroblasts and immortal pancreatic fibroblasts medium were measured, compared, and found to be similar.

619 Bone marrow cells were obtained from both femur and tibia of the mouse and differentiated for five  
620 days in DMEM supplemented with 10ng of CSF1 (PeproTech, NJ, USA) for five days to generate BMDMs.

621 A total of 75,000 fibroblasts or 50,000 KP-2 cells or both cell types were co-cultured with 100,000  
622 BMDMs in 6-well cell culture plates (Costar, San Jose, CA, USA). BrdU was added 6 h prior to harvest at  
623 each time point. For Transwell assays, 150,000 fibroblasts were cultured in the Transwell assay with  
624 200,000 BMDMs, and BrdU was added 6 h prior to harvest.

625 Small interfering RNAs (siRNAs) targeting mouse CSF1 and p21 were purchased from Integrated  
626 DNA Technologies (Coralville, IA, USA). Sequences are listed in Table S2. The siRNA transfections for  
627 primary BMDMs and pancreatic fibroblasts were performed using the Mouse Macrophage Nucleofector™  
628 Kit (Lonza) and Nucleofector™ 2b Device (Lonza) with prewritten program Y-001 for BMDMs and V-013 for  
629 fibroblasts, following the manufacturer's instructions. RNA and protein from transfected primary cells were  
630 harvest 24 h after the transfections.

631

## 632 **Microarray and RT-qPCR analysis**

633 Total RNA was isolated from BMDMs derived from p21<sup>CE</sup>, p21<sup>WT</sup>, or p21<sup>-/-</sup>, or from siRNA targeting for p21-  
634 treated BMDMs using the E.N.Z.A. Total RNA Kit (Omega Chemicals, Cowpens, SC, USA) according to  
635 the manufacturer's instructions. Microarrays were performed on p21 knocked-down BMDMs with the  
636 treatment of tumor-conditioned medium for 24 h. A differential gene list was generated with detected fold-

637 changes  $> 1.5$ , adjusted  $p < 0.05$ . The filtered differential gene list was loaded into R and a hypergeometric  
638 test was used to compare known catalogs of functional annotations (enricher) with a FDR of  $p < 0.05$ . Top  
639 differentially-regulated genes are listed in Table S1. RNAs from BMDMs of  $p21^{CE}$ ,  $p21^{WT}$ , and  $p21^{-/-}$  were  
640 reversed-transcribed to cDNAs by using the qScript cDNA SuperMix (QuantaBio, Beverly, MA, USA).  
641 Quantitative real-time PCR Taqman primer probe sets specific for targets listed in Table S7 (Applied  
642 Biosystems, Foster City, CA, USA) were used, and the relative gene expression for each target was  
643 determined on a ABI7900HT quantitative PCR machine (Applied Biosystems) using a Taqman Gene  
644 Expression Master Mix (Applied Biosystems). The threshold cycle method was used to determine fold-  
645 changes of gene expressions normalized to *Gapdh*, *Hprt*, and *Tbp*.

646

#### 647 **ELISA and the cytokine array**

648 Conditioned media from fibroblasts and tumor cells were harvested after changing the medium to 0.1%  
649 FBS for 24 h with  $> 80\%$  confluency. The cytokine array were conducted by using a Proteome Profiler  
650 Mouse XL Cytokine Array kit (R&D Systems, Minneapolis, MN, USA) following the manufacturer's  
651 instructions. The membranes from each conditioned medium were placed in an autoradiography film  
652 cassette and exposed to X-ray filming for 5–8 min. Positive signals were quantified by ImageJ software  
653 (National Institutes of Health, Bethesda, MD, USA). Conditioned media were concentrated using a Pierce  
654 Concentrator (Thermo Fisher Scientific) based on the manufacturer's instructions. CSF1 levels were  
655 measured by a Mouse M-CSF Matched Antibody Pair Kit (ab218788) following the manufacturer's  
656 instructions.

657

#### 658 **Single cell RNA sequencing**

659 Normal pancreas tissues were taken from three 10-week-old B6 mice, processed to single cell suspension  
660 as explained in the tissue harvest section, pooled together, and sorted for live macrophages  
661 ( $CD45^+CD11b^+F4/80^+CD3^-CD19^-SiglecF^-Ly6G^-Ly6C^-7AAD^-$ ) by using an Aria II cell sorter (BD Biosciences)

662 Pancreatic tumors were taken from three 1.5-month-old KPC mice, processed to a single cell  
663 suspension, pooled, and sorted for live macrophages and DC-enriched populations ( $CD45^+CD3^-CD19^-$   
664  $SiglecF^-Ly6G^-7AAD^-$ ).

665 Orthotopic KP-2 tumors were taken from  $p21^{CE}$  and  $p21^{WT}$  mice, and three from each genotype  
666 were pooled as one sample and sorted for live  $CD45^+$  cells ( $CD45^+7AAD^-$ ). Two libraries were created for  
667 each genotype.

668 Sorted cells from each sample were encapsulated into droplets and libraries were prepared using  
669 Chromium Single Cell 3'v3 Reagent kits according to the manufacturer's protocol (10x Genomics,  
670 Pleasanton, CA, USA). The generated libraries were sequenced by a NovaSeq 6000 sequencing system  
671 (Illumina, San Diego, CA, USA) to an average of 50,000 mean reads per cell. Cellranger mkfastq pipeline  
672 (10X Genomics) was used to demultiplex illumine base call files to FASTQ files. Files from the normal  
673 pancreas, pancreatic tumors, and orthotopic tumors were demultiplexed with  $> 97\%$  valid barcodes, and  $>$

674 94% q30 reads. YFP sequences were inserted into the mm10 reference (v.3.1.0; 10X Genomics) using the  
675 Cellranger Mkref pipeline. Afterwards, fastq files from each sample were processed with Cellranger counts  
676 and aligned to the mm10 reference (v.3.1.0, 10X Genomics) or mm10 containing YFP for p21<sup>CE</sup> orthotopic  
677 tumor samples and the generated feature barcode matrix.

678 Human scRNAseq data were obtained from a publicly available dataset (Peng et al., 2019). FASTQ  
679 files were realigned to the human GRCh38 reference and generated feature barcode matrix, including 24  
680 PDAC samples and 11 normal samples. However, only 21 PDAC samples and six normal samples  
681 successfully passed the Cellranger count function.

682 Mouse scRNAseq data (mPDAC GEMM-1) used in Fig. 3 A,B and Fig. 4 L,M and Fig. S2 F were  
683 obtained from a published paper (Hosein et al., 2019).

684

### 685 **Mouse scRNAseq data analysis**

686 The filtered feature barcode matrix from the normal pancreas, KPC pancreatic tumors, and p21<sup>WT</sup> orthotopic  
687 tumors were loaded into Seurat as Seurat objects (Seurat v.3). For each Seurat object, genes that were  
688 expressed in less than three cells and cells that expressed less than 1,000 or more than 8,000 genes, were  
689 excluded. Cells with greater than 6% mitochondrial RNA content were also excluded, resulting in 9,821  
690 cells for normal, 6,091 for KPC tumors, and 16,904 for orthotopic tumors. SCTransform with default  
691 parameters was used on each individual sample to normalize and scale the expression matrix against the  
692 sequence depths and percentages of mitochondrial genes. Cell cycle scores and the corresponding cell  
693 cycle phase for each cell were calculated, and assigned after SCTransform based on the expression  
694 signatures for S and G2/M genes (CellCycleScoring). The differences between the S phase score and G2/M  
695 score were regressed-out by SCTransform on individual samples. Variable features were calculated for  
696 each sample independently and ranked, based on the number of samples they were independently  
697 identified (SelectIntegrationFeatures). The top 3,000 shared variable features were used for multi-set  
698 canonical correlation analysis to reduce dimensions and identify projection vectors that defined shared  
699 biological states among samples and maximized overall correlations across datasets. Mutual nearest  
700 neighbors (MNNS; pairs of cells, with one from each dataset) were calculated and identified as “anchors”  
701 (FindIntegrationAnchors). Multiple datasets were then integrated based on these calculated “anchors” and  
702 guided order trees with default parameters (IntegrateData). Principle component analysis (PCA) was  
703 performed on the 3,000 variable genes calculated earlier (function RunPCA). A UMAP dimensional  
704 reduction was performed on the scaled matrix using the first 25 PCA components to obtain a two-  
705 dimensional representation of cell states. Then, these defined 25 dimensionalities were used to refine the  
706 edge weights between any two cells based on Jaccard similarity (FindNeighbors), and were used to cluster  
707 cells through FindClusters functions, which implemented shared nearest neighbor modularity optimization  
708 with a resolution of 0.3, leading to 21 clusters.

709 To characterize clusters, the FindAllMarkers function with logfold threshold = 0.25 and minimum  
710 0.25-fold difference and MAST test were used to identify signatures alone with each cluster. The

711 macrophage/monocytes (clusters 0, 1, 2, 4, 6, 13, and 17)(Fig. S1 E) were selected and the top 3,000  
712 variable features were recalculated to recluster to a higher resolution of 1. Macrophages were selected  
713 based on clusters with high expressions of known macrophage marker genes, including *Csf1r*, *C1qa*, *C1qb*,  
714 and *H2-Aa*, and confirmed by the absence of *Cd3e*, *Ms4a1*, *Krt19*, *Zbtb46*, and *Flt3*, and further confirmed  
715 by identifying DEGs associated with potential macrophage clusters, when compared to known macrophage  
716 specific marker genes. In Fig. 1 J, we reran SCTransform without regressing-out cell cycle scores to  
717 visualize proliferating macrophage clusters. In Fig. 4, L and M, monocyte clusters were removed based on  
718 expressions of monocyte markers, *Ly6c2*, *Plac8*, and *Vcan*. Macrophages were then stratified based on  
719 p21 expression into p21<sup>High</sup> (top 10%) and p21<sup>Low</sup> (bottom 10%), resulting in 219 of p21<sup>High</sup> vs. 182 of p21<sup>Low</sup>  
720 TAMs in KPC tumor, and 475 of p21<sup>High</sup> vs. 526 of p21<sup>Low</sup> TAMs in KP-2 orthotopic tumors. For GSEA  
721 comparisons, the log<sub>2</sub> (fold-change) of all genes detected with min.pct > 0.1 and past MAST test was used  
722 as a ranking metric. GSEA was performed using GO terms, KEGG pathways, Reactome, and MSigDB  
723 gene sets with Benjamini-Hochberg FDR < 0.05 in ClusterProfiler (Wu et al., 2021). For DEGs between the  
724 two groups in each mouse PDAC model, we filtered genes with a Bonferroni-corrected p-value < 0.05 and  
725 fold-change >1.2 or <0.8.

726 For the mouse dataset (Hosein et al., 2019), the filtered feature barcode matrices, containing KIC,  
727 KPC, and KPFC, were processed similarly with major cell types annotated in Fig. 3 B. Macrophages were  
728 then selected and stratified based on p21 expressions into p21<sup>High</sup> (top 10%) and p21<sup>Low</sup> (bottom 10%),  
729 resulting in 263 of p21<sup>High</sup> TAMs vs. 237 of p21<sup>Low</sup> TAMs.

730 For p21<sup>CE</sup> and p21<sup>WT</sup> comparisons, the filtered feature barcode matrix was processed similarly,  
731 ending with 16,931 cells for p21<sup>WT</sup> tumors, and 9,519 cells for p21<sup>CE</sup> tumors. Cell cycle scores and the  
732 corresponding cell cycle phase for each cell were calculated and assigned after SCTransform based on the  
733 expression signatures for S and G2/M associated genes (CellCycleScoring). The top 3,000 variable genes,  
734 25 dimensionalities, and resolution of 0.3 generated 19 clusters (Fig. S4, A and B) , including 16,093 cells  
735 for p21<sup>CE</sup> tumors and 8,996 cells for p21<sup>WT</sup> tumors. Each population, including macrophages (clusters 1, 3,  
736 5, 12, 15, and 18), monocytes (cluster 2), DCs (clusters 4, 11, 9, and 16), neutrophils (cluster 14), and  
737 eosinophils (cluster 0) were subsetted, at 15 dimensionalities and resolutions of 1 to generate Fig. 6 C and  
738 Fig. 7 A and Fig. S4 E. Cell cycle effects were also regressed-out when subsetting on each cell type, except  
739 for macrophages. DEGs with minimum percentage > 0.1, a Bonferroni-corrected p-value < 0.05. and fold-  
740 change > 1.3 or < 0.75 were considered significant. The log<sub>2</sub> (fold-change) of all genes detected with  
741 minimum percentage > 0.1 and past MAST tests were used as a ranking metric for GSEA analysis. Gene  
742 sets with FDR < 0.05 were considered significant.

743

#### 744 **Human scRNAseq data analysis**

745 For the human dataset (Peng et al., 2019), cells with greater than 15% mitochondrial genes were retained  
746 and cells that expressed less than 500 genes were excluded. SCTransform with default parameters was  
747 used on each individual sample to normalize and scale the expression matrix against sequence depth and

748 percentage of mitochondrial genes. Cell cycle scores and the corresponding cell cycle phase for each cell  
749 were calculated, then assigned after SCTransform based on the expression signatures for S and G2/M  
750 genes (CellCycleScoring). The differences between S phase scores and G2/M scores were regressed-out  
751 by SCTransform on individual samples. Variable features were calculated for every sample in the dataset  
752 independently and ranked based on the number of samples they were independently identified  
753 (SelectIntegrationFeatures). The top 3,000 shared variable features were used for PCA. The calculated  
754 PCA embedding of each cell was then used as an input for the soft k-means clustering algorithm. Briefly,  
755 through iteration, the algorithm designated the cluster-specific centroids and cell-specific correction factors  
756 corresponding to batch effects. The correction factors were used to assign cells into clusters until the  
757 assignment was stable (RunHarmony). Afterwards, similar steps were taken; UMAP reduction used the first  
758 20 PCA components and FindClusters with a resolution of 0.3, leading to 12 clusters (Fig. 3 D). Immune  
759 cell clusters (3, 4, 9, and 10) were reclustered, reintegrated (RunHarmony), and UMAP reduction was used  
760 with a resolution of 0.5 to generate 11 clusters. The clusters were further grouped into NKT cells, T<sub>regs</sub>, T  
761 cells, Myeloid cells, and B cells in Fig. 1, F and G.

762

### 763 **The mpIHC**

764 Mouse tissues were fixed in 10% formalin for 24 h and embedded in paraffin after graded ethanol  
765 dehydration. Embedded tissues were sectioned into 6- $\mu$ m sections and loaded into BOND R<sub>x</sub>m (Leica  
766 Biosystems, Wetzlar, Germany) for a series of staining including F4/80, p21, PDPN, Ki67, and CK19. Based  
767 on antibody host species, default manufacturer protocols were used (IntenseR and Polymer Refine),  
768 containing antigen-retrieval with citrate buffer, goat serum and peroxide block, primary antibody incubation,  
769 post-primary incubation, and chromogenically visualized with an AEC substrate (Abcam, Cambridge, UK).  
770 Between each two cycles of staining, the slides were manually stained for hemoxylin and eosin, then  
771 scanned by Axio Scan.Z1 (Zeiss, Jena, Germany). The slides were then destained by a gradient of ethanol  
772 plus a 2% hydrochloride wash and blocked with extra avidin/biotin (Vector Laboratories, Burlingame, CA,  
773 USA) and a Fab fragment block (Jackson Laboratory, Bar Harbor, ME, USA).

774 Images of the same specimen but different stains were cropped into multiple segments by Zen  
775 software (Zeiss). Each segment was then deconvoluted (Deconvolution, v.1.0.4; Indica Labs, Albuquerque,  
776 NM, USA) for individual staining and fused using HALO software (Zeiss) with the default manufacturer's  
777 settings. Markers of interest were pseudo-colored and quantified through the High plex FL, v.4.0.3 algorithm  
778 (Indica Labs).

779

### 780 **Acknowledgements:**

781 We thank the Washington University Transgenic Vector Center for generating constructs of p21<sup>CE</sup> mice. We  
782 thank the Washington University Center for Cellular Imaging for imaging experiments. We thank The CHiPs  
783 Immunomonitoring Laboratory for CyTOF experiments. We thank the Flow Cytometry & Fluorescence

784 Activated Cell Sorting Core for sorting and flow cytometry experiments. We thank the Genome Technology  
785 Access Center for scRNAseq and microarray experiments.

786

787 **Online supplemental material:**

788 **Fig. S1** examine mplHC staining and identifies cell types in Human CyTOF and murine scRNAseq analysis.

789 **Fig. S2** supports siRNA knockdown of p21 in BMDMs *in vitro*, and shows p21 expression in TAMs and its  
790 connection to cell-cycle states. Representative images used to evaluate mplHC staining of murine PDAC

791 tissues are included. **Fig. S3** demonstrates flow cytometry and complete blood count analysis of the  
792 immune compositions in non-tumor bearing p21<sup>CE</sup> and p21<sup>WT</sup> mice, and in tumor bearing p21<sup>CE</sup> and p21<sup>WT</sup>

793 mice. **Fig. S4** identifies major clusters in scRNAseq analysis performed on tumor bearing p21<sup>CE</sup> and p21<sup>WT</sup>  
794 mice. It also provides bar plots for macrophage depletion experiment. **Fig. S5** shows the GSEA results

795 when comparing TAMs from p21<sup>CE</sup> to p21<sup>WT</sup>. **Table S1** includes the top 50 differentially expressed genes  
796 in p21-deprived BMDMs cultured in tumor conditioned medium. **Table S2** includes all siRNA sequences

797 used in the current paper. **Table S3** includes antibodies used for flow cytometry. **Table S4** includes all  
798 antibodies used for mplHC. **Tables S5** and **S6** include all antibodies used for CyTOF. **Table S7** lists all

799 primers used for qPCR. **Table S8** lists all organisms and strains used. **Table S9** lists all softwares and  
800 algorithms. Chemicals and recombinant proteins used could be found in **Table S10**. **Table S11** shows all

801 the commercial assays used.

802

803 **References:**

804 Abram, C.L., G.L. Roberge, Y. Hu, and C.A. Lowell. 2014. Comparative analysis of the efficiency and  
805 specificity of myeloid-Cre deleting strains using ROSA-EYFP reporter mice. *J Immunol Methods*.  
806 408:89–100. doi:10.1016/j.jim.2014.05.009.

807 Amano, S.U., J.L. Cohen, P. Vangala, M. Tencerova, S.M. Nicolero, J.C. Yawe, Y. Shen, M.P. Czech,  
808 and M. Aouadi. 2014. Local proliferation of macrophages contributes to obesity-associated  
809 adipose tissue inflammation. *Cell Metab*. 19:162–171. doi:10.1016/j.cmet.2013.11.017.

810 Balkwill, F. 2006. TNF-alpha in promotion and progression of cancer. *Cancer Metastasis Rev*. 25:409–  
811 416. doi:10.1007/s10555-006-9005-3.

812 Borgoni, S., A. Iannello, S. Cutrupi, P. Allavena, M. D'Incalci, F. Novelli, and P. Cappello. 2018. Depletion  
813 of tumor-associated macrophages switches the epigenetic profile of pancreatic cancer infiltrating  
814 T cells and restores their anti-tumor phenotype. *Oncoimmunology*. 7:e1393596.  
815 doi:10.1080/2162402X.2017.1393596.

816 Bottazzi, B., E. Erba, N. Nobili, F. Fazioli, A. Rambaldi, and A. Mantovani. 1990. A paracrine circuit in the  
817 regulation of the proliferation of macrophages infiltrating murine sarcomas. *J Immunol*. 144:2409–  
818 2412.

819 Brugarolas, J., K. Moberg, S.D. Boyd, Y. Taya, T. Jacks, and J.A. Lees. 1999. Inhibition of cyclin-  
820 dependent kinase 2 by p21 is necessary for retinoblastoma protein-mediated G1 arrest after  $\gamma$ -  
821 irradiation. *Proc Natl Acad Sci U S A*. 96:1002–1007.

822 Candido, J.B., J.P. Morton, P. Bailey, A.D. Campbell, S.A. Karim, T. Jamieson, L. Lapienyte, A.  
823 Gopinathan, W. Clark, E.J. McGhee, J. Wang, M. Escorcio-Correia, R. Zollinger, R. Roshani, L.

- 824 Drew, L. Rishi, R. Arkell, T.R.J. Evans, C. Nixon, D.I. Jodrell, R.W. Wilkinson, A.V. Biankin, S.T.  
825 Barry, F.R. Balkwill, and O.J. Sansom. 2018. CSF1R+ Macrophages Sustain Pancreatic Tumor  
826 Growth through T Cell Suppression and Maintenance of Key Gene Programs that Define the  
827 Squamous Subtype. *Cell Reports*. 23:1448–1460. doi:10.1016/j.celrep.2018.03.131.
- 828 Cannarile, M.A., M. Weisser, W. Jacob, A.-M. Jegg, C.H. Ries, and D. Rüttinger. 2017. Colony-stimulating  
829 factor 1 receptor (CSF1R) inhibitors in cancer therapy. *Journal for ImmunoTherapy of Cancer*.  
830 5:53. doi:10.1186/s40425-017-0257-y.
- 831 Cassetta, L., and J.W. Pollard. 2018. Targeting macrophages: therapeutic approaches in cancer. *Nature*  
832 *Reviews Drug Discovery*. 17:887–904. doi:10.1038/nrd.2018.169.
- 833 Castro-Dopico, T., and M.R. Clatworthy. 2019. IgG and Fcγ Receptors in Intestinal Immunity and  
834 Inflammation. *Front Immunol*. 10:805. doi:10.3389/fimmu.2019.00805.
- 835 Cazzalini, O., A.I. Scovassi, M. Savio, L.A. Stivala, and E. Prosperi. 2010. Multiple roles of the cell cycle  
836 inhibitor p21(CDKN1A) in the DNA damage response. *Mutat Res*. 704:12–20.  
837 doi:10.1016/j.mrrev.2010.01.009.
- 838 Clausen, B.E., C. Burkhardt, W. Reith, R. Renkawitz, and I. Förster. 1999. Conditional gene targeting in  
839 macrophages and granulocytes using LysMcre mice. *Transgenic Res*. 8:265–277.  
840 doi:10.1023/a:1008942828960.
- 841 Coveler, A.L., D.L. Bajor, A. Masood, E. Yilmaz, A.F. Shields, M.M. Javle, R.K. Paluri, G.M. Vaccaro, M.  
842 Zalupski, J.E. Grilley-Olson, H.L. Kindler, M.W. Schmitt, and M. Gutierrez. 2020. Phase I study of  
843 SEA-CD40, gemcitabine, nab-paclitaxel, and pembrolizumab in patients with metastatic  
844 pancreatic ductal adenocarcinoma (PDAC). *JCO*. 38:TPS4671–TPS4671.  
845 doi:10.1200/JCO.2020.38.15\_suppl.TPS4671.
- 846 Davies, L.C., M. Rosas, P.J. Smith, D.J. Fraser, S.A. Jones, and P.R. Taylor. 2011. A quantifiable  
847 proliferative burst of tissue macrophages restores homeostatic macrophage populations after  
848 acute inflammation. *European Journal of Immunology*. 41:2155–2164.  
849 doi:https://doi.org/10.1002/eji.201141817.
- 850 DeNardo, D.G., and B. Ruffell. 2019. Macrophages as regulators of tumor immunity and immunotherapy.  
851 *Nat Rev Immunol*. 19:369–382. doi:10.1038/s41577-019-0127-6.
- 852 Deng, C., P. Zhang, J.W. Harper, S.J. Elledge, and P. Leder. 1995. Mice lacking p21CIP1/WAF1 undergo  
853 normal development, but are defective in G1 checkpoint control. *Cell*. 82:675–684.  
854 doi:10.1016/0092-8674(95)90039-x.
- 855 Doedens, A.L., C. Stockmann, M.P. Rubinstein, D. Liao, N. Zhang, D.G. DeNardo, L.M. Coussens, M.  
856 Karin, A.W. Goldrath, and R.S. Johnson. 2010. Macrophage expression of hypoxia-inducible  
857 factor-1 alpha suppresses T-cell function and promotes tumor progression. *Cancer Res*.  
858 70:7465–7475. doi:10.1158/0008-5472.CAN-10-1439.
- 859 Dutto, I., M. Tillhon, O. Cazzalini, L.A. Stivala, and E. Prosperi. 2015. Biology of the cell cycle inhibitor  
860 p21CDKN1A: molecular mechanisms and relevance in chemical toxicology. *Arch Toxicol*.  
861 89:155–178. doi:10.1007/s00204-014-1430-4.
- 862 Elyada, E., M. Bolisetty, P. Laise, W.F. Flynn, E.T. Courtois, R.A. Burkhart, J.A. Teinor, P. Belleau, G.  
863 Biffi, M.S. Lucito, S. Sivajothi, T.D. Armstrong, D.D. Engle, K.H. Yu, Y. Hao, C.L. Wolfgang, Y.  
864 Park, J. Preall, E.M. Jaffee, A. Califano, P. Robson, and D.A. Tuveson. 2019. Cross-Species  
865 Single-Cell Analysis of Pancreatic Ductal Adenocarcinoma Reveals Antigen-Presenting Cancer-  
866 Associated Fibroblasts. *Cancer Discov*. 9:1102–1123. doi:10.1158/2159-8290.CD-19-0094.



- 867 Finck, R., E.F. Simonds, A. Jager, S. Krishnaswamy, K. Sachs, W. Fantl, D. Pe'er, G.P. Nolan, and S.C.  
868 Bendall. 2013. Normalization of mass cytometry data with bead standards. *Cytometry Part A*.  
869 83A:483–494. doi:<https://doi.org/10.1002/cyto.a.22271>.
- 870 Franklin, R.A., W. Liao, A. Sarkar, M.V. Kim, M.R. Bivona, K. Liu, E.G. Pamer, and M.O. Li. 2014. The  
871 cellular and molecular origin of tumor-associated macrophages. *Science*. 344:921–925.  
872 doi:10.1126/science.1252510.
- 873 Gardner, A., and B. Ruffell. 2016. Dendritic Cells and Cancer Immunity. *Trends Immunol.* 37:855–865.  
874 doi:10.1016/j.it.2016.09.006.
- 875 Ginhoux, F., and M. Williams. 2016. Tissue-Resident Macrophage Ontogeny and Homeostasis.  
876 *Immunity*. 44:439–449. doi:10.1016/j.immuni.2016.02.024.
- 877 Hao, N.-B., M.-H. Lü, Y.-H. Fan, Y.-L. Cao, Z.-R. Zhang, and S.-M. Yang. 2012. Macrophages in Tumor  
878 Microenvironments and the Progression of Tumors. *Clinical and Developmental Immunology*.  
879 2012:e948098. doi:<https://doi.org/10.1155/2012/948098>.
- 880 Hashimoto, D., A. Chow, C. Noizat, P. Teo, M.B. Beasley, M. Leboeuf, C.D. Becker, P. See, J. Price, D.  
881 Lucas, M. Greter, A. Mortha, S.W. Boyer, E.C. Forsberg, M. Tanaka, N. van Rooijen, A. Garcia-  
882 Sastre, E.R. Stanley, F. Ginhoux, P.S. Frenette, and M. Merad. 2013. Tissue-resident  
883 macrophages self-maintain locally throughout adult life with minimal contribution from circulating  
884 monocytes. *Immunity*. 38:792–804. doi:10.1016/j.immuni.2013.04.004.
- 885 Hervas-Stubbs, S., J.L. Perez-Gracia, A. Rouzaut, M.F. Sanmamed, A.L. Bon, and I. Melero. 2011. Direct  
886 Effects of Type I Interferons on Cells of the Immune System. *Clin Cancer Res*. 17:2619–2627.  
887 doi:10.1158/1078-0432.CCR-10-1114.
- 888 Hingorani, S.R., E.F. Petricoin, A. Maitra, V. Rajapakse, C. King, M.A. Jacobetz, S. Ross, T.P. Conrads,  
889 T.D. Veenstra, B.A. Hitt, Y. Kawaguchi, D. Johann, L.A. Liotta, H.C. Crawford, M.E. Putt, T.  
890 Jacks, C.V.E. Wright, R.H. Hruban, A.M. Lowy, and D.A. Tuveson. 2003. Preinvasive and  
891 invasive ductal pancreatic cancer and its early detection in the mouse. *Cancer Cell*. 4:437–450.  
892 doi:10.1016/S1535-6108(03)00309-X.
- 893 Hingorani, S.R., L. Wang, A.S. Multani, C. Combs, T.B. Deramaudt, R.H. Hruban, A.K. Rustgi, S. Chang,  
894 and D.A. Tuveson. 2005. Trp53R172H and KrasG12D cooperate to promote chromosomal  
895 instability and widely metastatic pancreatic ductal adenocarcinoma in mice. *Cancer Cell*. 7:469–  
896 483. doi:10.1016/j.ccr.2005.04.023.
- 897 Hosein, A.N., H. Huang, Z. Wang, K. Parmar, W. Du, J. Huang, A. Maitra, E. Olson, U. Verma, and R.A.  
898 Brekken. 2019. Cellular heterogeneity during mouse pancreatic ductal adenocarcinoma  
899 progression at single-cell resolution. *JCI Insight*. 4. doi:10.1172/jci.insight.129212.
- 900 Hsu, C.-H., S.J. Altschuler, and L.F. Wu. 2019. Patterns of Early p21 Dynamics Determine Proliferation-  
901 Senescence Cell Fate after Chemotherapy. *Cell*. 178:361-373.e12.  
902 doi:10.1016/j.cell.2019.05.041.
- 903 Ino, Y., R. Yamazaki-Itoh, K. Shimada, M. Iwasaki, T. Kosuge, Y. Kanai, and N. Hiraoka. 2013. Immune  
904 cell infiltration as an indicator of the immune microenvironment of pancreatic cancer. *Br J Cancer*.  
905 108:914–923. doi:10.1038/bjc.2013.32.
- 906 Jenkins, S.J., D. Ruckerl, P.C. Cook, L.H. Jones, F.D. Finkelman, N. van Rooijen, A.S. MacDonald, and  
907 J.E. Allen. 2011. Local macrophage proliferation, rather than recruitment from the blood, is a  
908 signature of TH2 inflammation. *Science*. 332:1284–1288. doi:10.1126/science.1204351.

- 909 Jenkins, S.J., D. Ruckerl, G.D. Thomas, J.P. Hewitson, S. Duncan, F. Brombacher, R.M. Maizels, D.A.  
910 Hume, and J.E. Allen. 2013. IL-4 directly signals tissue-resident macrophages to proliferate  
911 beyond homeostatic levels controlled by CSF-1. *J Exp Med.* 210:2477–2491.  
912 doi:10.1084/jem.20121999.
- 913 Jiang, H., S. Hegde, B.L. Knolhoff, Y. Zhu, J.M. Herndon, M.A. Meyer, T.M. Nywening, W.G. Hawkins,  
914 I.M. Shapiro, D.T. Weaver, J.A. Pachter, A. Wang-Gillam, and D.G. DeNardo. 2016. Targeting  
915 focal adhesion kinase renders pancreatic cancers responsive to checkpoint immunotherapy. *Nat*  
916 *Med.* 22:851–860. doi:10.1038/nm.4123.
- 917 Kaplan, D.H. 2017. Ontogeny and function of murine epidermal Langerhans cells. *Nature Immunology.*  
918 18:1068–1075. doi:10.1038/ni.3815.
- 919 Kim, M.P., D.B. Evans, H. Wang, J.L. Abbruzzese, J.B. Fleming, and G.E. Gallick. 2009. Generation of  
920 orthotopic and heterotopic human pancreatic cancer xenografts in immunodeficient mice. *Nat*  
921 *Protoc.* 4:1670–1680. doi:10.1038/nprot.2009.171.
- 922 Kitajima, S., R. Thummalapalli, and D.A. Barbie. 2016. Inflammation as a Driver and Vulnerability of  
923 KRAS Mediated Oncogenesis. *Semin Cell Dev Biol.* 58:127–135.  
924 doi:10.1016/j.semcd.2016.06.009.
- 925 Korsunsky, I., N. Millard, J. Fan, K. Slowikowski, F. Zhang, K. Wei, Y. Baglaenko, M. Brenner, P. Loh, and  
926 S. Raychaudhuri. 2019. Fast, sensitive and accurate integration of single-cell data with Harmony.  
927 *Nat Methods.* 16:1289–1296. doi:10.1038/s41592-019-0619-0.
- 928 Koucký, V., J. Bouček, and A. Fialová. 2019. Immunology of Plasmacytoid Dendritic Cells in Solid  
929 Tumors: A Brief Review. *Cancers (Basel).* 11:470. doi:10.3390/cancers11040470.
- 930 Lee, A.W., S. Nambirajan, and J.G. Moffat. 1999. CSF-1 activates MAPK-dependent and p53-  
931 independent pathways to induce growth arrest of hormone-dependent human breast cancer cells.  
932 *Oncogene.* 18:7477–7494. doi:10.1038/sj.onc.1203123.
- 933 Lee, J.W., C.A. Komar, F. Bengsch, K. Graham, and G.L. Beatty. 2016. Genetically Engineered Mouse  
934 Models of Pancreatic Cancer: The KPC Model (LSL-Kras(G12D/+);LSL-Trp53(R172H/+);Pdx-1-  
935 Cre), Its Variants, and Their Application in Immuno-oncology Drug Discovery. *Curr Protoc*  
936 *Pharmacol.* 73:14.39.1-14.39.20. doi:10.1002/cpph.2.
- 937 Levine, J.H., E.F. Simonds, S.C. Bendall, K.L. Davis, E.D. Amir, M.D. Tadmor, O. Litvin, H.G. Fienberg,  
938 A. Jager, E.R. Zunder, R. Finck, A.L. Gedman, I. Radtke, J.R. Downing, D. Pe'er, and G.P.  
939 Nolan. 2015. Data-Driven Phenotypic Dissection of AML Reveals Progenitor-like Cells that  
940 Correlate with Prognosis. *Cell.* 162:184–197. doi:10.1016/j.cell.2015.05.047.
- 941 Lin, K.-Y., D. Lu, C.-F. Hung, S. Peng, L. Huang, C. Jie, F. Murillo, J. Rowley, Y.-C. Tsai, L. He, D.-J. Kim,  
942 E. Jaffee, D. Pardoll, and T.-C. Wu. 2007. Ectopic expression of vascular cell adhesion molecule-  
943 1 as a new mechanism for tumor immune evasion. *Cancer Res.* 67:1832–1841.  
944 doi:10.1158/0008-5472.CAN-06-3014.
- 945 Liu, L., Y. Lu, J. Martinez, Y. Bi, G. Lian, T. Wang, S. Milasta, J. Wang, M. Yang, G. Liu, D.R. Green, and  
946 R. Wang. 2016. Proinflammatory signal suppresses proliferation and shifts macrophage  
947 metabolism from Myc-dependent to HIF1 $\alpha$ -dependent. *PNAS.* 113:1564–1569.  
948 doi:10.1073/pnas.1518000113.
- 949 Lun, A.T.L., A.C. Richard, and J.C. Marioni. 2017. Testing for differential abundance in mass cytometry  
950 data. *Nat Methods.* 14:707–709. doi:10.1038/nmeth.4295.

- 951 Marchant, A., C. Bruyns, P. Vandenabeele, M. Ducarme, C. Gérard, A. Delvaux, D. De Groote, D.  
952 Abramowicz, T. Velu, and M. Goldman. 1994. Interleukin-10 controls interferon-gamma and  
953 tumor necrosis factor production during experimental endotoxemia. *Eur J Immunol.* 24:1167–  
954 1171. doi:10.1002/eji.1830240524.
- 955 Martin, C., D. Ohayon, M. Alkan, J. Mocek, M. Pederzoli-Ribeil, C. Candalh, G. Thevenot, A. Millet, N.  
956 Tamassia, M.A. Cassatella, N. Thieblemont, P.-R. Burgel, and V. Witko-Sarsat. 2016. Neutrophil-  
957 Expressed p21/waf1 Favors Inflammation Resolution in *Pseudomonas aeruginosa* Infection. *Am*  
958 *J Respir Cell Mol Biol.* 54:740–750. doi:10.1165/rcmb.2015-0047OC.
- 959 Matsushime, H., M.F. Roussel, R.A. Ashmun, and C.J. Sherr. 1991. Colony-stimulating factor 1 regulates  
960 novel cyclins during the G1 phase of the cell cycle. *Cell.* 65:701–713. doi:10.1016/0092-  
961 8674(91)90101-4.
- 962 Mavers, M., C.M. Cuda, A.V. Misharin, A.K. Gierut, H. Agrawal, E. Weber, D.V. Novack, G.K. Haines, D.  
963 Balomenos, and H. Perlman. 2012. Cyclin-dependent kinase inhibitor p21, via its C-terminal  
964 domain, is essential for resolution of murine inflammatory arthritis. *Arthritis Rheum.* 64:141–152.  
965 doi:10.1002/art.33311.
- 966 McInnes, L., J. Healy, and J. Melville. 2020. UMAP: Uniform Manifold Approximation and Projection for  
967 Dimension Reduction. *arXiv:1802.03426 [cs, stat]*.
- 968 Merad, M., P. Sathe, J. Helft, J. Miller, and A. Mortha. 2013. The Dendritic Cell Lineage: Ontogeny and  
969 Function of Dendritic Cells and Their Subsets in the Steady State and the Inflamed Setting. *Annu*  
970 *Rev Immunol.* 31. doi:10.1146/annurev-immunol-020711-074950.
- 971 Mitchem, J.B., D.J. Brennan, B.L. Knolhoff, B.A. Belt, Y. Zhu, D.E. Sanford, L. Belaygorod, D. Carpenter,  
972 L. Collins, D. Piwnica-Worms, S. Hewitt, G.M. Udupi, W.M. Gallagher, C. Wegner, B.L. West, A.  
973 Wang-Gillam, S.P. Goedegebuure, D.C. Linehan, and D.G. DeNardo. 2013. Targeting tumor-  
974 infiltrating macrophages decreases tumor-initiating cells, relieves immunosuppression and  
975 improves chemotherapeutic responses. *Cancer Res.* 73:1128–1141. doi:10.1158/0008-  
976 5472.CAN-12-2731.
- 977 Müller, E., P.F. Christopoulos, S. Halder, A. Lunde, K. Beraki, M. Speth, I. Øynebråten, and A. Corthay.  
978 2017. Toll-Like Receptor Ligands and Interferon- $\gamma$  Synergize for Induction of Antitumor M1  
979 Macrophages. *Front. Immunol.* 8. doi:10.3389/fimmu.2017.01383.
- 980 Nowicka, M., C. Krieg, H.L. Crowell, L.M. Weber, F.J. Hartmann, S. Guglietta, B. Becher, M.P. Levesque,  
981 and M.D. Robinson. 2017. CyTOF workflow: differential discovery in high-throughput high-  
982 dimensional cytometry datasets. *F1000Res.* 6:748. doi:10.12688/f1000research.11622.3.
- 983 Noy, R., and J.W. Pollard. 2014. Tumor-associated macrophages: from mechanisms to therapy.  
984 *Immunity.* 41:49–61. doi:10.1016/j.immuni.2014.06.010.
- 985 Peng, J., B.-F. Sun, C.-Y. Chen, J.-Y. Zhou, Y.-S. Chen, H. Chen, L. Liu, D. Huang, J. Jiang, G.-S. Cui, Y.  
986 Yang, W. Wang, D. Guo, M. Dai, J. Guo, T. Zhang, Q. Liao, Y. Liu, Y.-L. Zhao, D.-L. Han, Y.  
987 Zhao, Y.-G. Yang, and W. Wu. 2019. Single-cell RNA-seq highlights intra-tumoral heterogeneity  
988 and malignant progression in pancreatic ductal adenocarcinoma. *Cell Res.* 29:725–738.  
989 doi:10.1038/s41422-019-0195-y.
- 990 Poh, A.R., and M. Ernst. 2018. Targeting Macrophages in Cancer: From Bench to Bedside. *Front. Oncol.*  
991 0. doi:10.3389/fonc.2018.00049.
- 992 Rackov, G., E. Hernández-Jiménez, R. Shokri, L. Carmona-Rodríguez, S. Mañes, M. Álvarez-Mon, E.  
993 López-Collazo, C. Martínez-A, and D. Balomenos. p21 mediates macrophage reprogramming

- 994 through regulation of p50-p50 NF- $\kappa$ B and IFN- $\beta$ . *J Clin Invest*. 126:3089–3103.  
995 doi:10.1172/JCI83404.
- 996 Ruffell, B., and L.M. Coussens. 2015. Macrophages and Therapeutic Resistance in Cancer. *Cancer Cell*.  
997 27:462–472. doi:10.1016/j.ccell.2015.02.015.
- 998 Salomon, B.L., M. Leclerc, J. Tosello, E. Ronin, E. Piaggio, and J.L. Cohen. 2018. Tumor Necrosis Factor  
999  $\alpha$  and Regulatory T Cells in Oncoimmunology. *Front Immunol*. 9. doi:10.3389/fimmu.2018.00444.
- 1000 Samain, R., A. Brunel, T. Douché, M. Fanjul, S. Cassant-Sourdy, J. Rochotte, J. Cros, C. Neuzillet, J.  
1001 Raffenne, C. Duluc, A. Perraud, J. Nigri, V. Gigoux, I. Bieche, M. Ponzo, G. Carpentier, I.  
1002 Cascone, R. Tomasini, H.A. Schmid, M. Mathonnet, R. Nicolle, M.-P. Bousquet, Y. Martineau, S.  
1003 Pyronnet, C. Jean, and C. Bousquet. 2021. Pharmacologic Normalization of Pancreatic Cancer-  
1004 Associated Fibroblast Secretome Impairs Prometastatic Cross-Talk With Macrophages. *Cellular*  
1005 *and Molecular Gastroenterology and Hepatology*. 11:1405–1436.  
1006 doi:10.1016/j.jcmgh.2021.01.008.
- 1007 Scatizzi, J.C., J. Hutcheson, E. Bickel, J.M. Woods, K. Klosowska, T.L. Moore, G.K. Haines, and H.  
1008 Perlman. 2006. p21Cip1 Is Required for the Development of Monocytes and Their Response to  
1009 Serum Transfer-induced Arthritis. *The American Journal of Pathology*. 168:1531–1541.  
1010 doi:10.2353/ajpath.2006.050555.
- 1011 Schnittert, J., R. Bansal, and J. Prakash. 2019. Targeting Pancreatic Stellate Cells in Cancer. *Trends*  
1012 *Cancer*. 5:128–142. doi:10.1016/j.trecan.2019.01.001.
- 1013 Seleznik, G.M., T. Reding, L. Peter, A. Gupta, S.G. Steiner, S. Sonda, C.S. Verbeke, E. Dejardin, I.  
1014 Khatkov, S. Segerer, M. Heikenwalder, and R. Graf. 2018. Development of autoimmune  
1015 pancreatitis is independent of CDKN1A/p21-mediated pancreatic inflammation. *Gut*. 67:1663–  
1016 1673. doi:10.1136/gutjnl-2016-313458.
- 1017 Sewing, A., B. Wiseman, A.C. Lloyd, and H. Land. 1997. High-intensity Raf signal causes cell cycle arrest  
1018 mediated by p21Cip1. *Mol Cell Biol*. 17:5588–5597. doi:10.1128/MCB.17.9.5588.
- 1019 Stuart, T., A. Butler, P. Hoffman, C. Hafemeister, E. Papalexi, W.M. Mauck, Y. Hao, M. Stoeckius, P.  
1020 Smibert, and R. Satija. 2019. Comprehensive Integration of Single-Cell Data. *Cell*. 177:1888-  
1021 1902.e21. doi:10.1016/j.cell.2019.05.031.
- 1022 Tang, J., M.E. Lobatto, L. Hassing, S. van der Staay, S.M. van Rijs, C. Calcagno, M.S. Braza, S. Baxter,  
1023 F. Fay, B.L. Sanchez-Gaytan, R. Duivenvoorden, H.B. Sager, Y.M. Astudillo, W. Leong, S.  
1024 Ramachandran, G. Storm, C. Pérez-Medina, T. Reiner, D.P. Cormode, G.J. Strijkers, E.S.G.  
1025 Stroes, F.K. Swirski, M. Nahrendorf, E.A. Fisher, Z.A. Fayad, and W.J.M. Mulder. 2015. Inhibiting  
1026 macrophage proliferation suppresses atherosclerotic plaque inflammation. *Science Advances*.  
1027 1:e1400223. doi:10.1126/sciadv.1400223.
- 1028 Tirosh, I., B. Izar, S.M. Prakadan, M.H. Wadsworth, D. Treacy, J.J. Trombetta, A. Rotem, C. Rodman, C.  
1029 Lian, G. Murphy, M. Fallahi-Sichani, K. Dutton-Regester, J.-R. Lin, O. Cohen, P. Shah, D. Lu,  
1030 A.S. Genshaft, T.K. Hughes, C.G.K. Ziegler, S.W. Kazer, A. Gaillard, K.E. Kolb, A.-C. Villani,  
1031 C.M. Johannessen, A.Y. Andreev, E.M. Van Allen, M. Bertagnolli, P.K. Sorger, R.J. Sullivan, K.T.  
1032 Flaherty, D.T. Frederick, J. Jané-Valbuena, C.H. Yoon, O. Rozenblatt-Rosen, A.K. Shalek, A.  
1033 Regev, and L.A. Garraway. 2016. Dissecting the multicellular ecosystem of metastatic melanoma  
1034 by single-cell RNA-seq. *Science*. 352:189–196. doi:10.1126/science.aad0501.
- 1035 Trakala, M., C.F. Arias, M.I. García, M.C. Moreno-Ortiz, K. Tsilingiri, P.J. Fernández, M. Mellado, M.T.  
1036 Díaz-Meco, J. Moscat, M. Serrano, C. Martínez-A, and D. Balomenos. 2009. Regulation of

- 1037 macrophage activation and septic shock susceptibility via p21(WAF1/CIP1). *European Journal of*  
1038 *Immunology*. 39:810–819. doi:<https://doi.org/10.1002/eji.200838676>.
- 1039 Tymoszyk, P., H. Evens, V. Marzola, K. Wachowicz, M.-H. Wasmer, S. Datta, E. Müller-Holzner, H. Fiegl,  
1040 G. Böck, N. van Rooijen, I. Theurl, and W. Doppler. 2014. In situ proliferation contributes to  
1041 accumulation of tumor-associated macrophages in spontaneous mammary tumors. *European*  
1042 *Journal of Immunology*. 44:2247–2262. doi:<https://doi.org/10.1002/eji.201344304>.
- 1043 Van Gassen, N., E. Van Overmeire, G. Leuckx, Y. Heremans, S. De Groef, Y. Cai, Y. Elkrim, C.  
1044 Gysemans, B. Stijlemans, M. Van de Casteele, P. De Baetselier, N. De Leu, H. Heimberg, and  
1045 J.A. Van Ginderachter. 2015. Macrophage dynamics are regulated by local macrophage  
1046 proliferation and monocyte recruitment in injured pancreas. *Eur J Immunol*. 45:1482–1493.  
1047 doi:10.1002/eji.201445013.
- 1048 Waghray, M., M. Yalamanchili, M.P. di Magliano, and D.M. Simeone. 2013. Deciphering the role of  
1049 stroma in pancreatic cancer. *Curr Opin Gastroenterol*. 29:537–543.  
1050 doi:10.1097/MOG.0b013e328363affe.
- 1051 Weber, L.M., M. Nowicka, C. Sonesson, and M.D. Robinson. 2019. diffcyt: Differential discovery in high-  
1052 dimensional cytometry via high-resolution clustering. *Commun Biol*. 2:1–11. doi:10.1038/s42003-  
1053 019-0415-5.
- 1054 Wu, T., E. Hu, S. Xu, M. Chen, P. Guo, Z. Dai, T. Feng, L. Zhou, W. Tang, L. Zhan, X. Fu, S. Liu, X. Bo,  
1055 and G. Yu. 2021. clusterProfiler 4.0: A universal enrichment tool for interpreting omics data. *The*  
1056 *Innovation*. 100141. doi:10.1016/j.xinn.2021.100141.
- 1057 Xaus, J., M. Comalada, A.F. Villedor, J. Lloberas, F. López-Soriano, J.M. Argilés, C. Bogdan, and A.  
1058 Celada. 2000. LPS induces apoptosis in macrophages mostly through the autocrine production of  
1059 TNF- $\alpha$ . *Blood*. 95:3823–3831. doi:10.1182/blood.V95.12.3823.
- 1060 Xiang, X., J. Wang, D. Lu, and X. Xu. 2021. Targeting tumor-associated macrophages to synergize tumor  
1061 immunotherapy. *Sig Transduct Target Ther*. 6:1–12. doi:10.1038/s41392-021-00484-9.
- 1062 Yang, H.W., M. Chung, T. Kudo, and T. Meyer. 2017. Competing memories of mitogen and p53 signalling  
1063 control cell-cycle entry. *Nature*. 549:404–408. doi:10.1038/nature23880.
- 1064 Yao, H., S.-R. Yang, I. Edirisinghe, S. Rajendrasozhan, S. Caito, D. Adenuga, M.A. O'Reilly, and I.  
1065 Rahman. 2008. Disruption of p21 attenuates lung inflammation induced by cigarette smoke, LPS,  
1066 and fMLP in mice. *Am J Respir Cell Mol Biol*. 39:7–18. doi:10.1165/rcmb.2007-0342OC.
- 1067 Zheng, W., and R.A. Flavell. 1997. The Transcription Factor GATA-3 Is Necessary and Sufficient for Th2  
1068 Cytokine Gene Expression in CD4 T Cells. *Cell*. 89:587–596. doi:10.1016/S0092-8674(00)80240-  
1069 8.
- 1070 Zhu, Y., J.M. Herndon, D.K. Sojka, K.-W. Kim, B.L. Knolhoff, C. Zuo, D.R. Cullinan, J. Luo, A.R. Bearden,  
1071 K.J. Lavine, W.M. Yokoyama, W.G. Hawkins, R.C. Fields, G.J. Randolph, and D.G. DeNardo.  
1072 2017. Tissue-Resident Macrophages in Pancreatic Ductal Adenocarcinoma Originate from  
1073 Embryonic Hematopoiesis and Promote Tumor Progression. *Immunity*. 47:323-338.e6.  
1074 doi:10.1016/j.immuni.2017.07.014.
- 1075 Zhu, Y., B.L. Knolhoff, M.A. Meyer, T.M. Nywening, B.L. West, J. Luo, A. Wang-Gillam, S.P.  
1076 Goedegebuure, D.C. Linehan, and D.G. DeNardo. 2014. CSF1/CSF1R Blockade Reprograms  
1077 Tumor-Infiltrating Macrophages and Improves Response to T-cell Checkpoint Immunotherapy in  
1078 Pancreatic Cancer Models. *Cancer Res*. 74:5057–5069. doi:10.1158/0008-5472.CAN-13-3723.

1079 Zunder, E.R., R. Finck, G.K. Behbehani, E.D. Amir, S. Krishnaswamy, V.D. Gonzalez, C.G. Lorang, Z.  
1080 Bjornson, M.H. Spitzer, B. Bodenmiller, W.J. Fantl, D. Pe'er, and G.P. Nolan. 2015. Palladium-  
1081 based mass tag cell barcoding with a doublet-filtering scheme and single-cell deconvolution  
1082 algorithm. *Nature Protocols*. 10:316–333. doi:10.1038/nprot.2015.020.

1083

1084

1085

1086

1087

1088

1089

1090

1091

1092

1093

1094

1095

1096

1097

1098

1099

1100

1101

1102

1103

1104

1105

1106

1107

1108

1109

1110

1111

1112

1113

1114

1115

1116

**Fig.1**

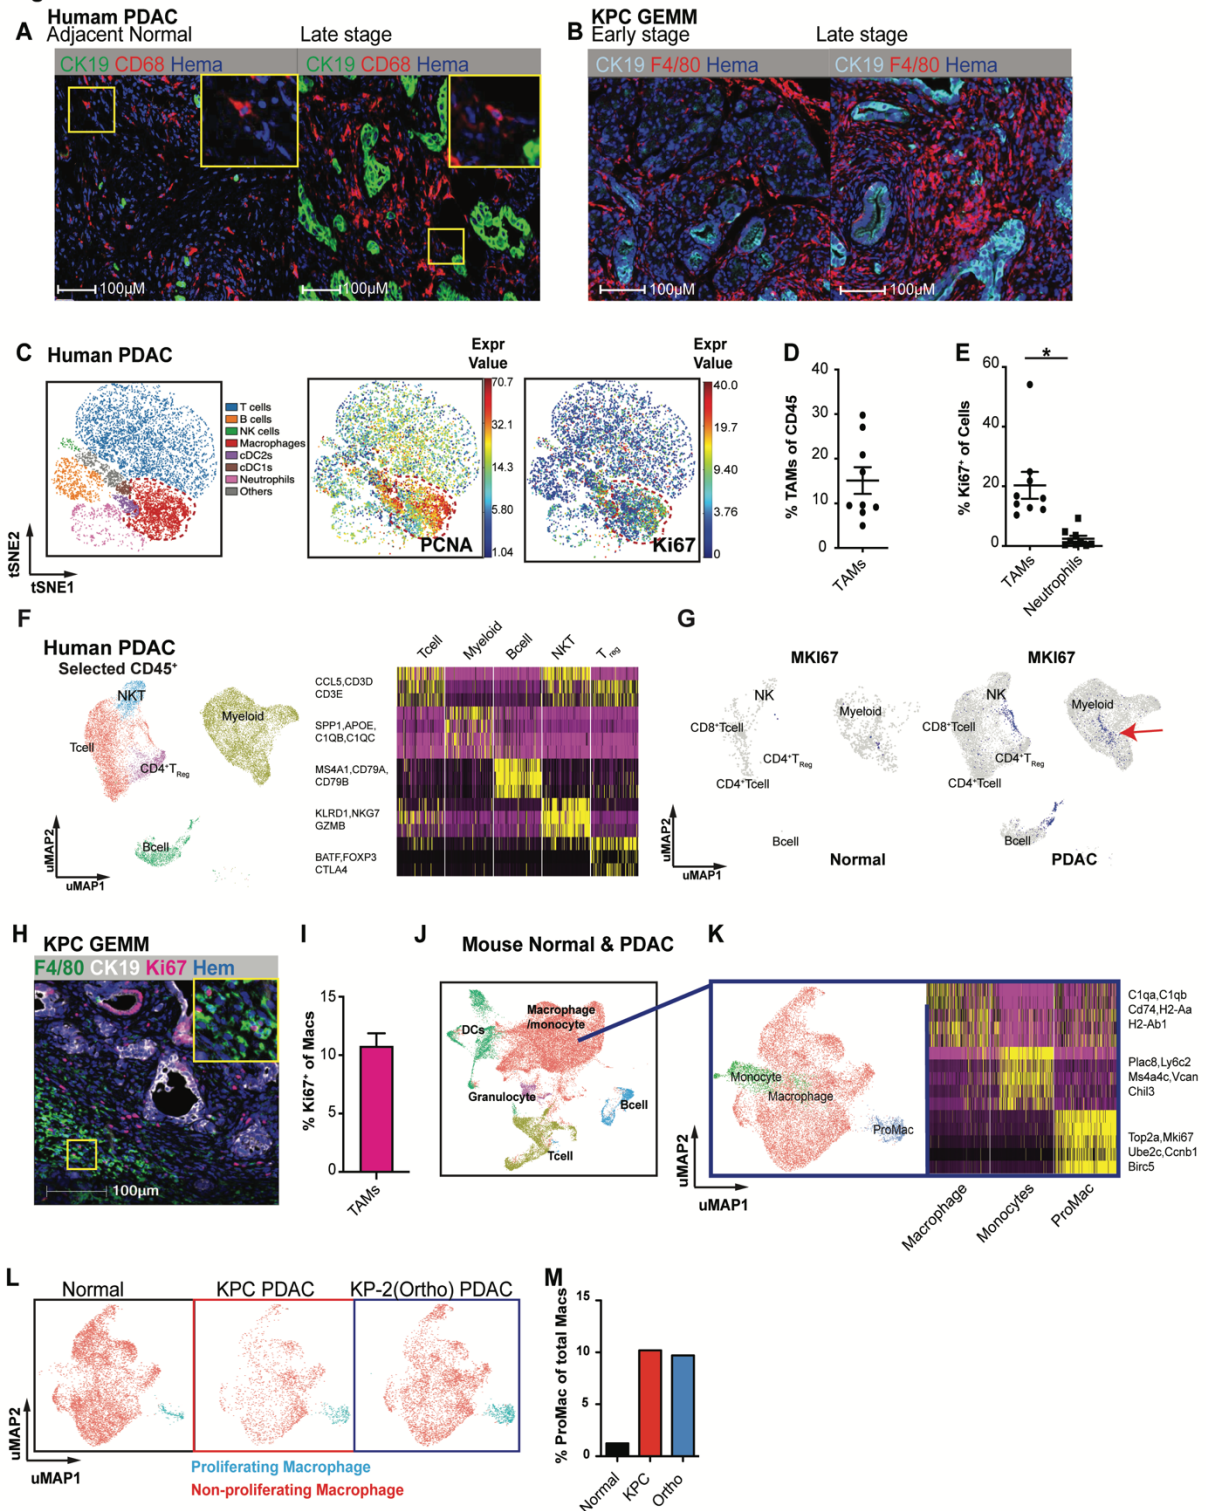

1117

1118

1119

1120  
1121  
1122  
1123  
1124  
1125  
1126  
1127  
1128  
1129  
1130  
1131  
1132  
1133  
1134  
1135  
1136  
1137  
1138  
1139  
1140  
1141  
1142  
1143  
1144  
1145  
1146  
1147  
1148  
1149  
1150  
1151  
1152  
1153  
1154  
1155  
1156

**Figure 1.**

**Pancreatic ductal adenocarcinoma (PDAC)-infiltrating macrophages are highly proliferative. (A)**

Representative immunohistochemistry (IHC) analyses of CD68<sup>+</sup> macrophages and CK19<sup>+</sup> tumor cells in the late stage of PDAC tissues and adjacent normal tissues from human patients. **(B)** Representative IHC analyses of F4/80<sup>+</sup> macrophage and CK19<sup>+</sup> tumor cells in early and late stages of KPC genetically engineered mouse models (GEMMs). **(C)** Representative tSNE plots of total normalized CD45<sup>+</sup> cells from a PDAC patient, annotated with manually assigned cell identity. The macrophage cluster was marked with a red circle, and expressions of PCNA and Ki67 were explicitly displayed. **(D,E)** Dot plot displaying quantification of tumor-associated macrophages (TAMs), Ki67<sup>+</sup> TAMs, and Ki67<sup>+</sup> neutrophils across nine human PDAC patients. **(F)** UMAP of realigned and reprocessed publicly available human pancreatic ductal adenocarcinoma (PDAC) dataset (Peng et al., 2019) displaying major CD45<sup>+</sup> clusters with expression levels of MKi67 and a heat map showing key gene expressions for each cluster. n = 21 PDAC samples, n = 6 normal samples. **(G)** UMAP plots displaying normalized expression levels of MKi67 across subpopulations with red arrow pointing to MKi67 expressing myeloid cells. **(H,I)** Representative multiplex immunohistochemistry (mpiHC) displaying F4/80<sup>+</sup> macrophages, CK19<sup>+</sup> tumor cells, and Ki67<sup>+</sup> proliferating cells in tumors from p48-Cre<sup>+</sup>/LSL-Kras<sup>G12D</sup>/p53<sup>fllox/fllox</sup> (KPC) GEMMs with quantification of Ki67<sup>+</sup> macrophages; n = 6 mice. **(J)** UMAP dimensionality reduction plot of integrated sorted CD45<sup>+</sup> cells from the murine normal pancreas and pancreatic tissues from KPC PDACs and KP-2 orthotopic PDACs with cell type annotations and cell cycle regression. **(K)** UMAP plot of reclustered macrophages/monocytes in **J** without cell cycle regression with a heat map displaying corresponding gene signatures. **(L)** UMAP displaying proliferating macrophages and non-proliferating macrophage clusters across the mouse scRNAseq data set used in **J** with quantification in **(M)**. Data are presented as the mean ± SEM. n.s., not significant; \*p < 0.05. For comparisons between any two groups, Student's two-tailed *t*-test was used.



Fig.2

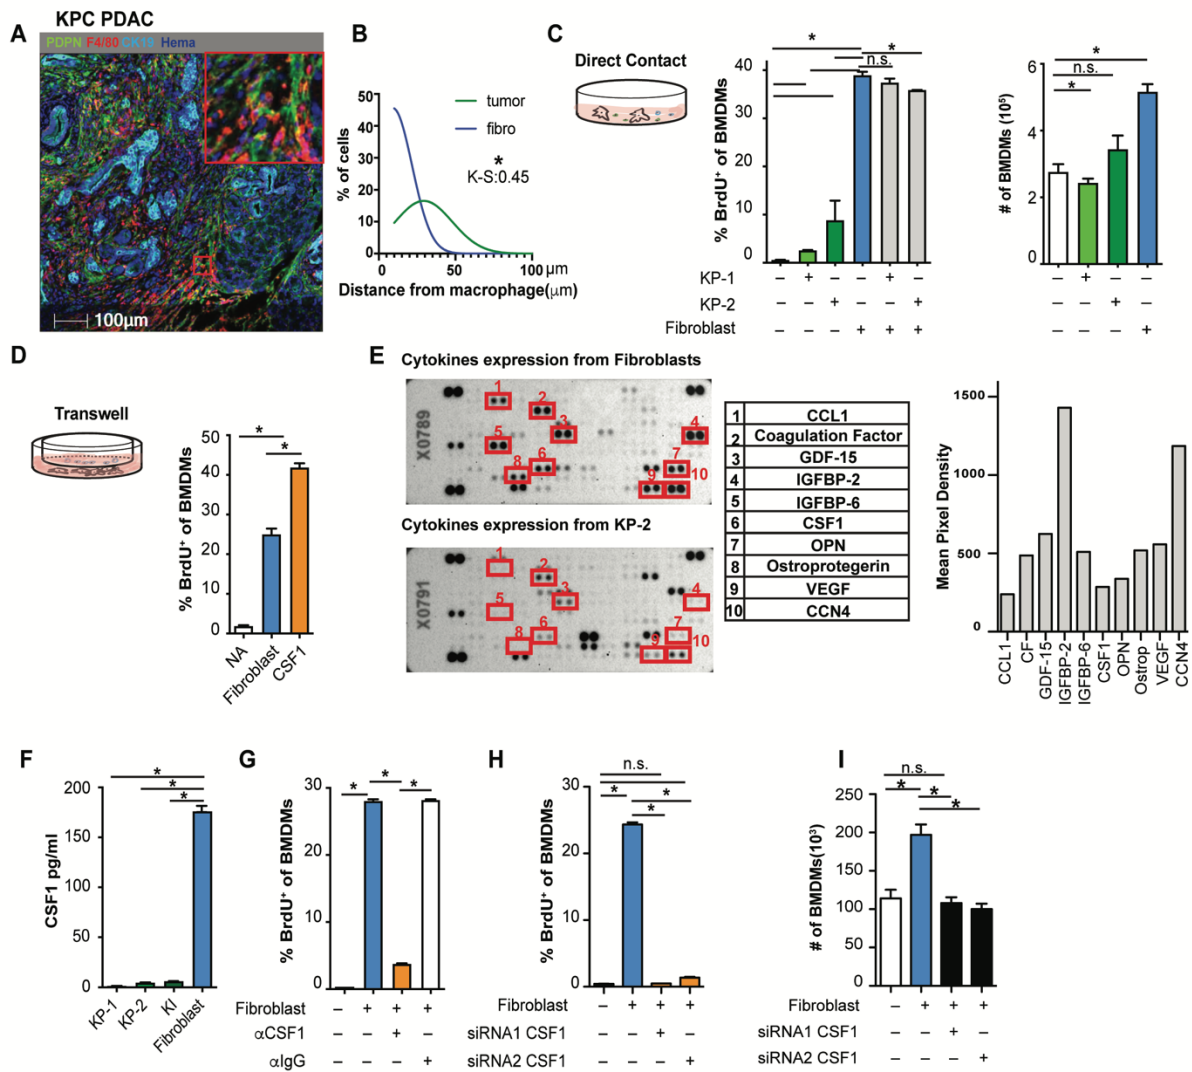

1157

1158

1159

1160 **Figure 2.**  
1161 **Fibroblasts drive macrophage proliferation through colony stimulating factor-1 (CSF1).** (A)  
1162 Representative multiplex immunohistochemistry (mIHC) image of p48:Cre<sup>+</sup>/LSL-Kras<sup>G12D</sup>/p53<sup>fllox/fllox</sup> (KPC)  
1163 mouse pancreatic ductal adenocarcinomas (PDACs) displaying alpha smooth muscle actin ( $\alpha$ SMA<sup>+</sup>) (white)  
1164 fibroblasts, CK19<sup>+</sup> (teal) tumor cells, and F4/80<sup>+</sup> (green) macrophages. (B) Frequency distribution of Pdpn<sup>+</sup>  
1165 fibroblasts (blue curve) and CK19+ tumor cells (green curve) to a nearest F4/80<sup>+</sup> macrophage. n = 6 KPC  
1166 mice. (C) The 5-bromo-2'-deoxyuridine (BrdU) incorporation and number of bone marrow-derived  
1167 macrophages (BMDMs) in co-culture with KP-1, KP-2, fibroblasts, or the combination for 48 h, BrdU pulsed  
1168 for the last 6 h; n = 6. (D) The BrdU incorporation of BMDMs when cultured with fibroblasts in a Transwell  
1169 assay or 10 ng/mL of CSF1 for 48 h, and BrdU pulsed for the last 6 h; n=3. (E) Representative image of a  
1170 cytokine antibody array resulting from fibroblast- and KP-2-conditioned media, highlighting the top 10 highly  
1171 expressed cytokines in fibroblast-conditioned medium and the corresponding mean pixel densities. The  
1172 arrays were repeated two times. (F) Bar graph shows the concentrations of CSF1 from three tumor-  
1173 conditioned media (KP-1, KP-2, and KI) and fibroblast-conditioned medium measured by an ELISA. (G)  
1174 BrdU incorporation of BMDMs in co-culture with fibroblasts treated with 2  $\mu$ g of  $\alpha$ CSF1 or 2  $\mu$ g of  $\alpha$ IgG for  
1175 24 h, and BrdU pulsed for the last 6 h; n=3. (H,I) BrdU incorporation and number of BMDMs in Transwell  
1176 cultures with fibroblasts with or without siRNA knockdown for CSF1; n=3. Data are presented as the mean  
1177  $\pm$  SEM. n.s., not significant; \*p<0.05. All *in vitro* assays were consistent across at least two independent  
1178 repeats. For comparisons between any two groups, Student's two-tailed *t*-test was used. Frequency  
1179 distributions were compared using the nonparametric Kolmogorov-Smirnov test.

1180  
1181  
1182  
1183  
1184  
1185  
1186  
1187  
1188  
1189  
1190  
1191  
1192  
1193  
1194  
1195  
1196

Fig.3

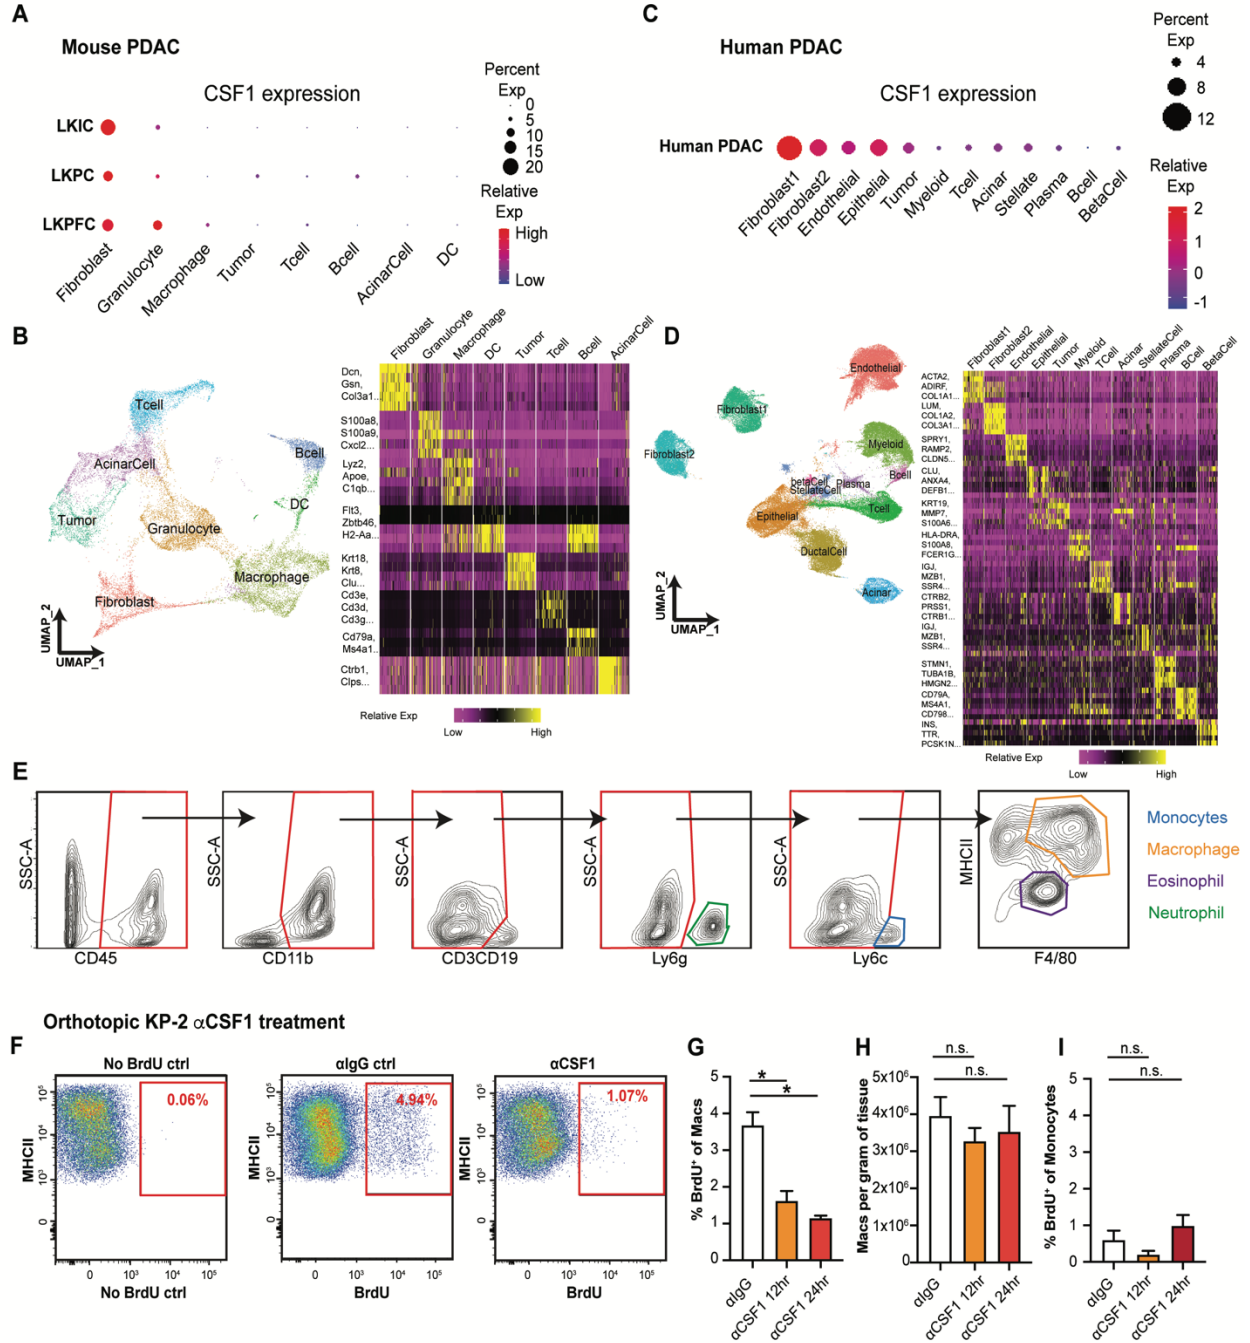

1197

1198

1199

1200 **Figure 3.**  
1201 **Cancer-associated fibroblasts drive tumor associated macrophage proliferation through colony**  
1202 **stimulating factor-1 (CSF1).** (A) Dot plot summarizing CSF1 expressions in different cell types across  
1203 three mouse PDAC models from the publicly available scRNAseq dataset (Hosein et al., 2019). (B) UMAP  
1204 dimensionality reduction plot of integrated cells from LKIC, LKP<sup>R172H/+</sup>C, and LKPFC genetically engineered  
1205 mouse models in scRNAseq dataset used in A, annotated with different cell types. Data were filtered and  
1206 reprocessed as described in the **Methods**. (C) Dot plot displaying CSF1 expressions in different cell types  
1207 across 21 human PDAC patient samples from the publicly available scRNAseq dataset (Peng et al., 2019).  
1208 (D) UMAP dimensionality reduction plot of integrated cells from 21 pancreatic adenocarcinoma patients  
1209 used in C, annotated with different cell types. (E) Representative flow cytometry plots showing the gating  
1210 strategy to identify macrophages, monocytes, neutrophils in orthotopic KP-2 tumors. (F-I) Representative  
1211 flow cytometry plot and quantification bar plot showing BrdU<sup>+</sup> macrophages and monocytes, and total  
1212 number of macrophages following  $\alpha$ IgG or  $\alpha$ CSF1 injections; n = 6-8 mice per group. Data are presented  
1213 as the mean  $\pm$  SEM. n.s., not significant; \*p<0.05. For comparisons between any two groups, Student's  
1214 two-tailed *t*-test was used.

1215  
1216  
1217  
1218  
1219  
1220  
1221  
1222  
1223  
1224  
1225  
1226  
1227  
1228  
1229  
1230  
1231  
1232  
1233  
1234  
1235  
1236

**Fig. 4**

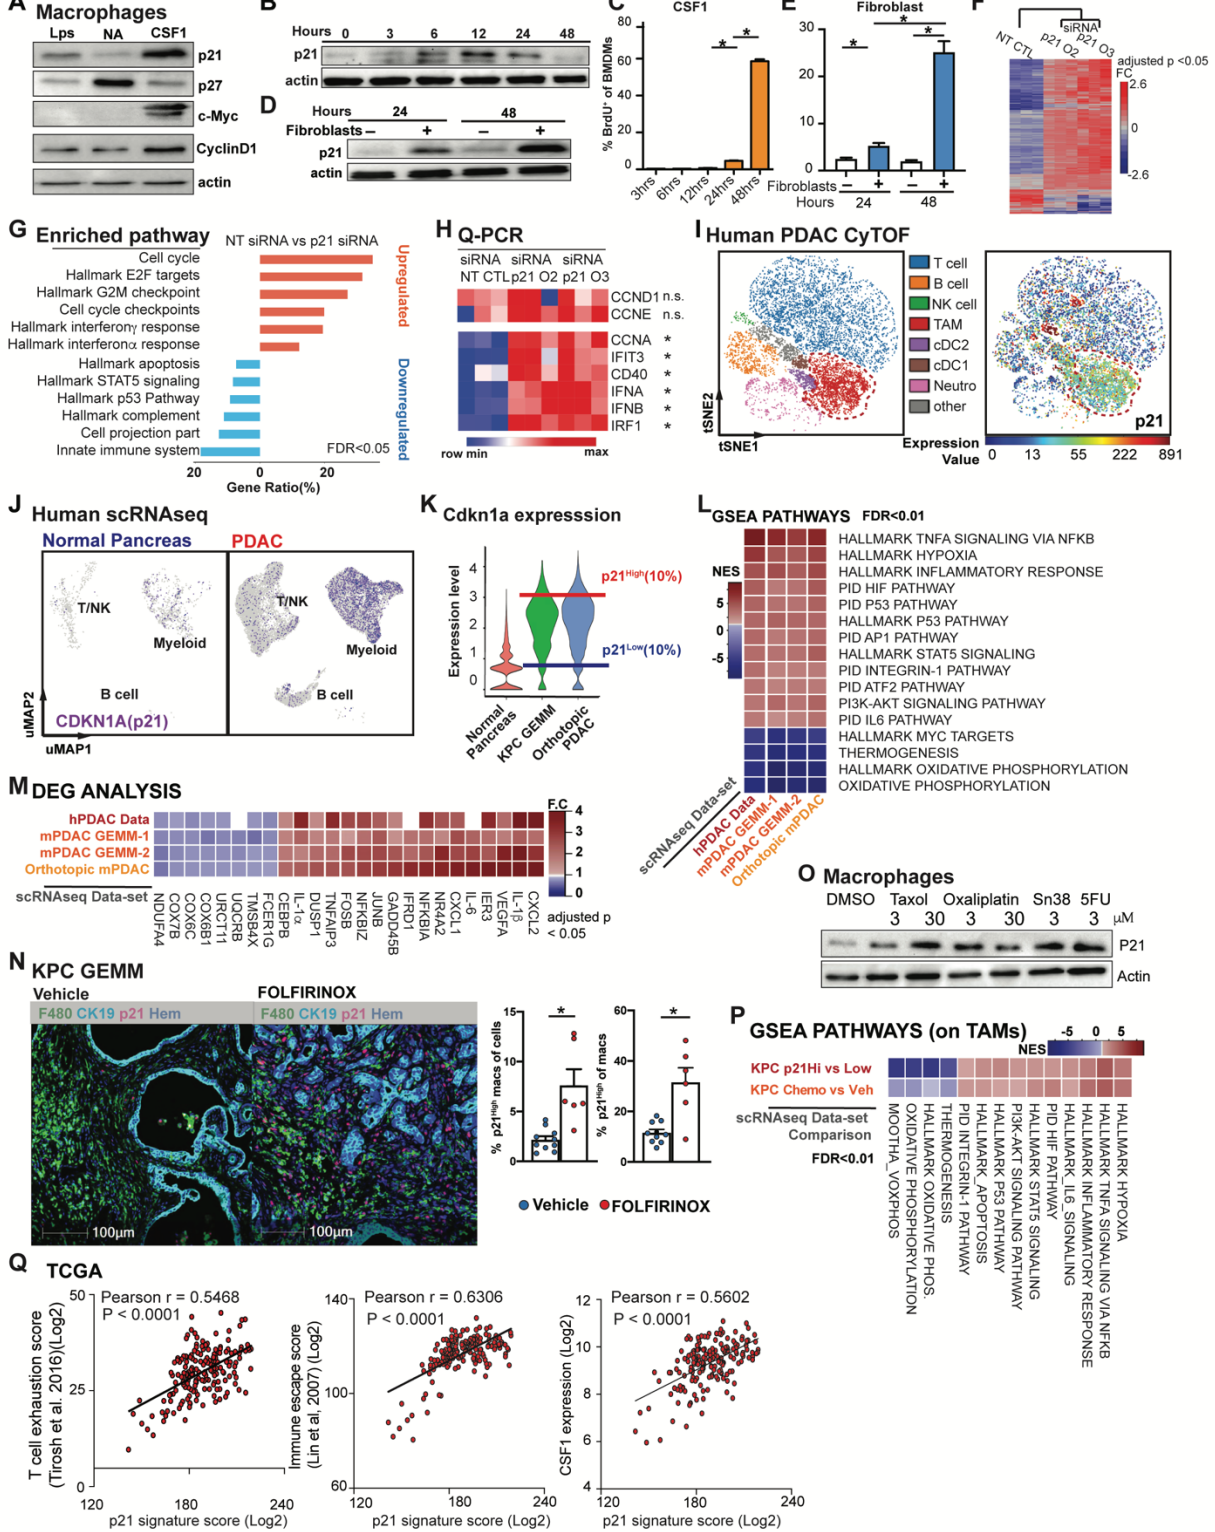

1237  
1238  
1239

1240 **Figure 4.**

1241 The p21 cell cycle-dependent kinase inhibitor is induced by CSF1 and regulates the macrophage  
1242 phenotype. **(A)** Immunoblots of p21, p27, c-Myc, and cyclinD1 in bone marrow-derived macrophages  
1243 (BMDMs) after treatment with 100 ng/mL of lipopolysaccharide or colony stimulating factor-1 (CSF1) for 24  
1244 h. The experiments were repeated three times. **(B)** Immunoblot displaying p21 expression in BMDMs  
1245 following 4 ng/mL CSF1 treatment at time 0 with quantification of BrdU<sup>+</sup> BMDMs shown in **(C)**, 5-bromo-2'-  
1246 deoxyuridine (BrdU) was added at time 0 and pulsed until harvest. BMDMs were starved without CSF1  
1247 overnight. **(D)** Immunoblot displaying p21 expression in BMDMs combined with fibroblasts in Transwell  
1248 assays at time 0. **(E)** Bar plot displaying the quantification of BrdU<sup>+</sup> BMDMs in **D**. **(F)** Heat map displaying  
1249 the microarray analysis of differentially expressed genes (DEGs) between non-target siRNA treated or  
1250 siRNA targeting for p21 treated BMDMs cultured in tumor-conditioned medium for 24 h; n = 3 per group.  
1251 Genes were filtered with adjusted p < 0.05 and fold-change > or < 1.5. **(G)** Bar graph displaying top  
1252 overrepresentation analysis of DEGs in **F** to known biological functions [Gene Ontology (GO), Kyoto  
1253 Encyclopedia of Genes and Genomes (KEGG), REACTOME, and Molecular Signatures Database  
1254 (MSigDB)] with a false discovery rate (FDR) < 0.05. **(H)** Heat map displaying qPCR analysis of gene  
1255 expressions of cell cycle and interferon-related genes between non-target siRNA treated or siRNA targeting  
1256 for p21 treated BMDMs cultured in tumor-conditioned medium for 24 h; fold-change > 1.5, n = 3/group of  
1257 the comparison. **(I)** Representative tSNE plot displaying major cell types from CyTOF analysis of a human  
1258 PDAC patient (same as in **Fig. 1 C**) with macrophages circled in red and p21 expression. **(J)** UMAP  
1259 displaying CDKN1A gene expression in CD45<sup>+</sup> cells from the human PDAC scRNAseq dataset (Peng et  
1260 al., 2019) with annotation of key cell types. **(K)** Violin plot showing the expression levels for p21 gene in  
1261 macrophage clusters from integrated scRNAseq analyses of the mouse normal pancreas and pancreatic  
1262 tissue from KPC GEMMs and orthotopic KP-2 tumor-bearing mice. Representative lines were drawn for  
1263 two groups of stratified macrophages based on the top 10% of p21 expression and bottom 10% of p21  
1264 expression. **(L)** Heat map of net enrichment score (NES) of shared enriched pathways identified by GSEA  
1265 analysis comparing the two groups of macrophages (p21<sup>High</sup> vs. p21<sup>Low</sup>) in human PDAC scRNAseq dataset  
1266 (23), (27), KPC GEMM and orthotopic scRNAseq data. Enriched pathways were selected by FDR < 0.01.  
1267 **(M)** Heat map displaying the shared DEGs when comparing p21<sup>High</sup> to p21<sup>Low</sup> tumor-associated  
1268 macrophages (TAMs) in each dataset with adjusted p < 0.05 and fold-change > 1.2 or < 0.8. p21<sup>High</sup>  
1269 signature score was created utilizing filtered DEGs with fold-change > 1.5 across three mouse scRNAseq  
1270 datasets. **(N)** Representative mplIHC image displaying F4/80<sup>+</sup> TAMs, CK19<sup>+</sup> tumor cells, and p21<sup>+</sup> cells in  
1271 KPC GEMM treated with dimethyl sulfoxide or FOLFIRINOX for 24 h with quantification of p21<sup>+</sup>TAMs as  
1272 total cells and total TAMs on the right. **(O)** Immunoblots showing expressions of p21 in BMDMs after  
1273 treatment with chemotherapeutics for 24 h. **(P)** Heat map of NES of shared enriched pathways identified  
1274 by GSEA analysis in comparing p21<sup>High</sup> to p21<sup>Low</sup> TAMs in KPC GEMM PDAC and in comparing  
1275 chemotherapeutic treated KPC GEMM PDAC to DMSO treated KPC GEMM PDAC with FDR < 0.05. **(Q)**  
1276 Correlation plots with Pearson coefficients (r) of p21 signature score vs. T cell exhaustion score (Tirosh et

1277 al., 2016), Immune escape score (Lin et al., 2007), and CSF1 expression from TCGA PDAC PanCancer  
1278 Atlas study (n=180).

1279 All graphs are expressed as the mean  $\pm$  SEM. n.s., not significant; \*p < 0.05. All *in vitro* assays and  
1280 immunoblots were consistent across more than two independent repeats. For comparisons between any  
1281 two groups, Student's two-tailed *t*-test was used, except for **F**, **M** where the Bonferroni correction was used  
1282 and for **L**, **P** where the FDR was used.

1283

1284

1285

1286

1287

1288

1289

1290

1291

1292

1293

1294

1295

1296

1297

1298

1299

1300

1301

1302

1303

1304

1305

1306

1307

1308

1309

1310

1311

1312

1313

**Fig.5**

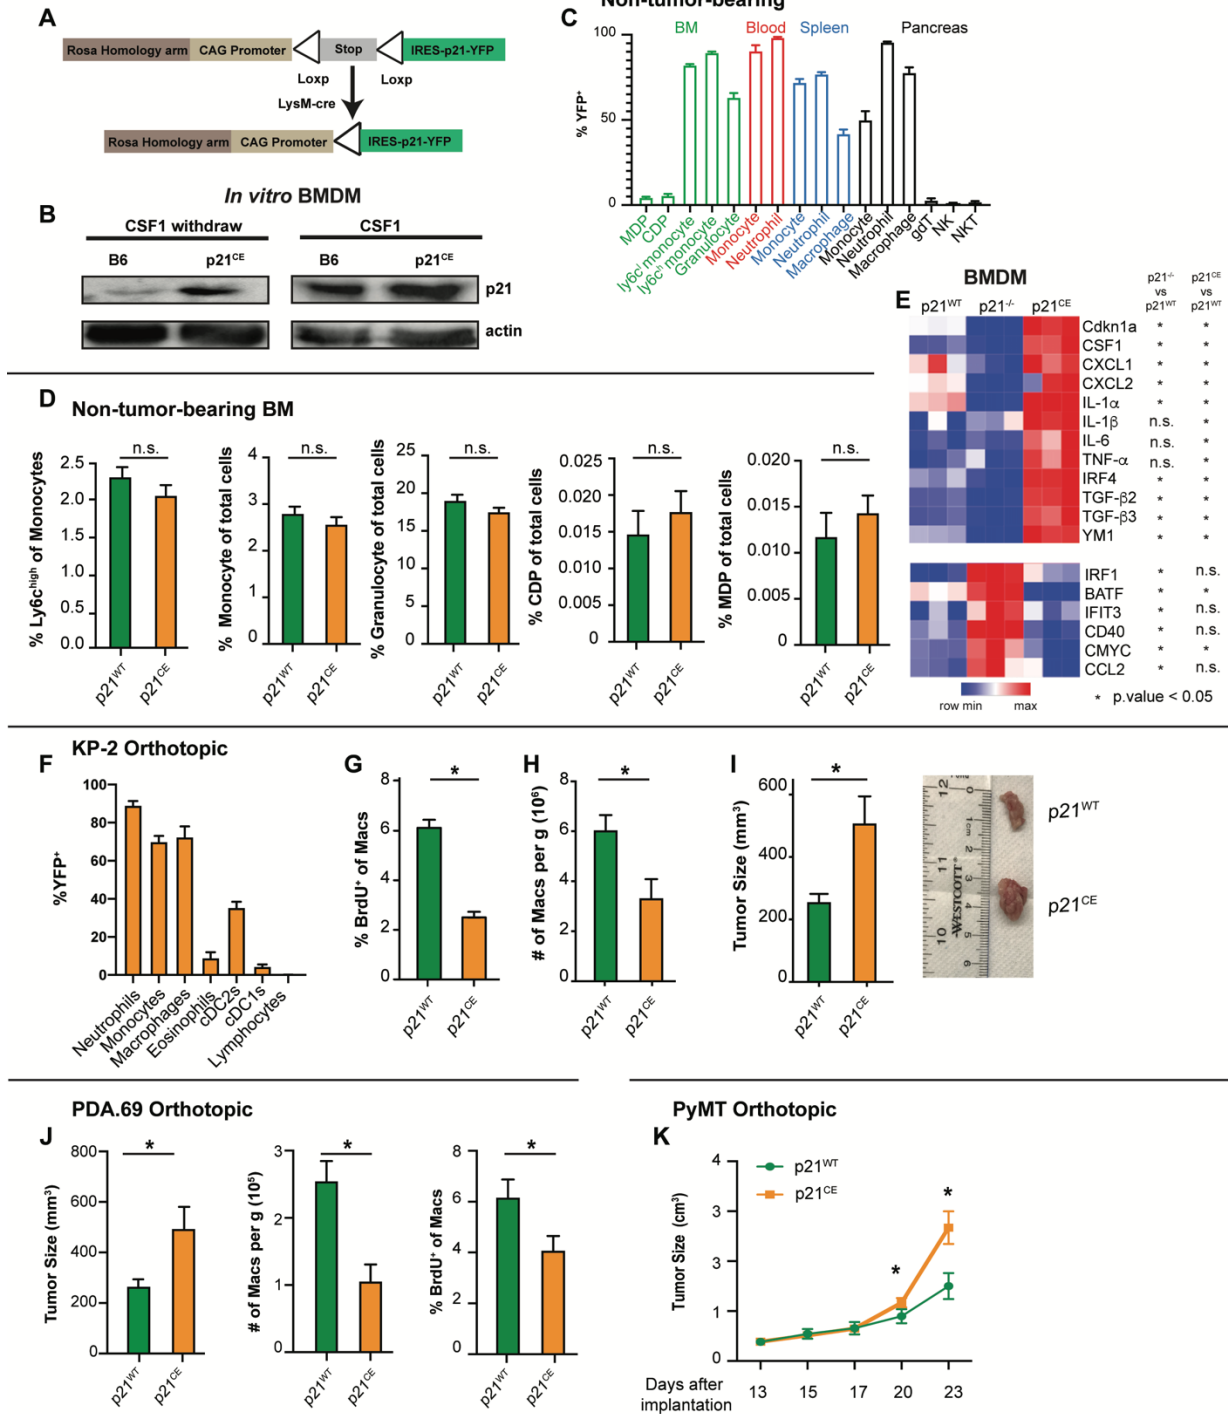

1314

1315

1316



1317 **Figure 5.**  
1318 **Expression of p21 drives tumor promoting phenotypes in macrophages. (A)** Genetic loci for the p21<sup>CE</sup>  
1319 model. **(B)** Immunoblot for p21 expression in p21<sup>CE</sup> or B6-derived bone marrow-derived macrophages  
1320 (BMDMs) with or without 10ng/ml of colony stimulating factor-1 (CSF1) treatment for 24 h. Experiments  
1321 were consistent in two independent repeats. **(C)** Bar plot displaying the percentage of YFP<sup>+</sup> cells in non-  
1322 tumor-bearing p21<sup>CE</sup> mice; n = 4. **(D)** Bar plot showing flow cytometry quantification of cellular composition  
1323 in non-tumor-bearing bone marrow from p21<sup>CE</sup> and p21<sup>WT</sup> mice; n = 6–9 mice/group. **(E)** Heat map  
1324 displaying gene expression analysis of BMDMs derived from non-tumor-bearing p21<sup>WT</sup>, p21<sup>-/-</sup>, and p21<sup>CE</sup>  
1325 mice treated with 10ng/ml of CSF1 for 24 h, by RT-qPCR; n = 3/group, data was consistent from three  
1326 independent repeats. **(F)** Flow cytometry quantification of YFP<sup>+</sup> cells in p21<sup>CE</sup> mice bearing orthotopic KP-  
1327 2 tumors; n = 6–7 mice. **(G,H)** Quantification of BrdU<sup>+</sup> macrophages and density of macrophages in tumors  
1328 of p21<sup>CE</sup> and p21<sup>WT</sup> mice; n = 6–7 mice/group. Data were pooled across multiple independent experiments.  
1329 **(I)** Bar plot displaying the tumor sizes in p21<sup>CE</sup> and p21<sup>WT</sup> mice, 21–27 days following orthotopic implantation  
1330 of KP-2 tumor cells; n = 8–10 mice/group. **(J)** Bar plot displaying tumor sizes, density of macrophages, and  
1331 quantification of BrdU<sup>+</sup> macrophages from p21<sup>CE</sup> and p21<sup>WT</sup> mice, 21–23 days after the orthotopic  
1332 implantation of the PDA.69 cell line; n = 8–10 mice/group. Data were pooled from multiple independent  
1333 experiments. **(K)** Caliper measurement of orthotopic PyMT in p21<sup>WT</sup> and p21<sup>CE</sup> mice; n = 6–8 mice /group.  
1334 All graphs are expressed as the mean ± SEM. n.s., not significant; \*p < 0.05. All *in vitro* assays were  
1335 consistent across more than two dependent repeats. For comparisons between any two groups, Student's  
1336 two-tailed *t*-test was used.

1337  
1338  
1339  
1340  
1341  
1342  
1343  
1344  
1345  
1346  
1347  
1348  
1349  
1350  
1351  
1352  
1353

Fig. 6

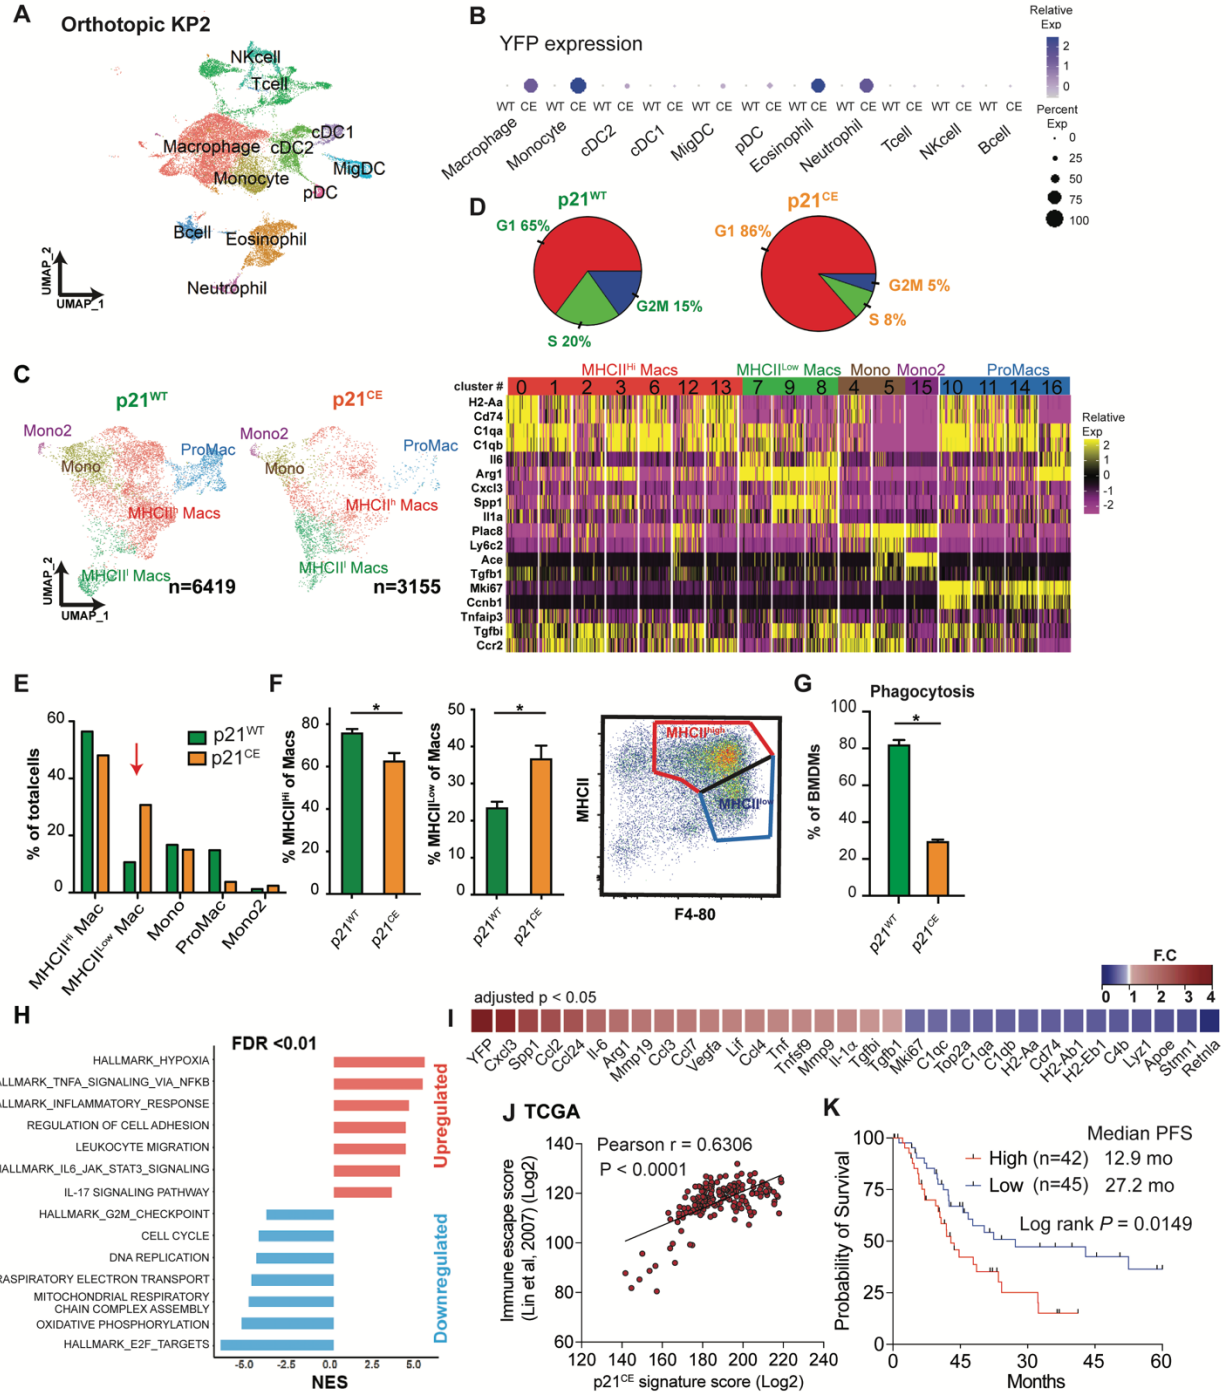

1354

1355

1356

1357 **Figure 6.**  
1358 **The p21 expression in macrophages led to an inflammatory but immunosuppressive phenotype. (A)**  
1359 UMAP dimensionality reduction plot of total CD45<sup>+</sup> cells from p21<sup>WT</sup> and p21<sup>CE</sup> mice bearing orthotopic KP-  
1360 2 tumors. Cells in each genotype were pooled from three mice and created as two libraries. Clusters were  
1361 annotated with corresponding cell types. **(B)** Dot plot displaying YFP expression in each cell type between  
1362 the two groups. The legend shows the dot size and corresponding percentage that are expressed as a color  
1363 gradient of normalized expressions. **(C)** Reclustered UMAP plot of macrophage and monocyte clusters in  
1364 **A** without cell cycle regression and split into p21<sup>WT</sup> and p21<sup>CE</sup>, and annotated with major subpopulations.  
1365 on the right, heat map showing key gene expressions in each subpopulation in **C**. **(D)** Pie chart showing  
1366 cell cycle analysis of macrophages (MHCII<sup>hi</sup>, MHCII<sup>low</sup>, and ProMac) in tumors from p21<sup>WT</sup> and p21<sup>CE</sup> mice.  
1367 **(E)**, Bar plot showing quantification of each population between p21<sup>WT</sup> and p21<sup>CE</sup> mice identified in **C**. **(F)**  
1368 Quantification of flow cytometry analysis of the percentages of MHCII<sup>hi</sup> and MHCII<sup>low</sup> macrophages from  
1369 p21<sup>CE</sup> and p21<sup>WT</sup> mice bearing orthotopic KP-2 tumors with the representative gating strategy; n = 6–10  
1370 mice/group. Data were consistent in four independent repeats. **(G)** Barplot displaying quantification of  
1371 fluorescent-bead<sup>+</sup> bone marrow-derived macrophages from p21<sup>WT</sup> and p21<sup>CE</sup> mice. Data were consistent  
1372 in three independent repeats. **(H)** Bar plot displaying Gene Set Enrichment Analysis results of comparing  
1373 tumor-associated macrophages (TAMs) from p21<sup>CE</sup> to p21<sup>WT</sup> mice. The key upregulated and downregulated  
1374 pathways are shown with a false discovery rate < 0.01. **(I)** Heat map showing the key differentially-  
1375 expressed genes (DEGs) comparing TAMs from p21<sup>CE</sup> and p21<sup>WT</sup> mice. DEGs were filtered with an  
1376 adjusted p < 0.05 and fold-change > 1.3 or < 0.75. All gene expressions were normalized by SCTransform.  
1377 **(J)** Correlation plots with Pearson coefficients (r) of p21<sup>CE</sup> signature score (included genes with  
1378 LogFC >0.75) vs. Immune escape score from TCGA PDAC PanCancer Atlas study (n=180). **(K)** Kaplan-  
1379 Meier survival analysis of PDA patients from TCGA whose samples were stratified by expression of the  
1380 p21<sup>CE</sup> signature (LogFC >0.75) by quartiles. All graphs are expressed as the mean ± SEM. n.s., not  
1381 significant; \*p < 0.05 using the *t*-test, except for **I** where the Bonferroni-corrected adjusted p-value was  
1382 used.  
1383  
1384  
1385  
1386  
1387  
1388  
1389  
1390  
1391  
1392  
1393

**Fig. 7**

**A scRNAseq on Orthotopic KP-2**

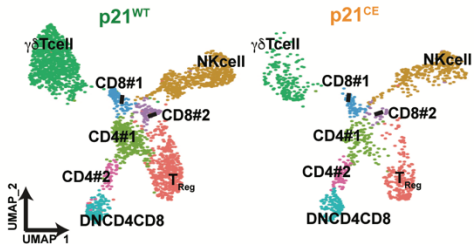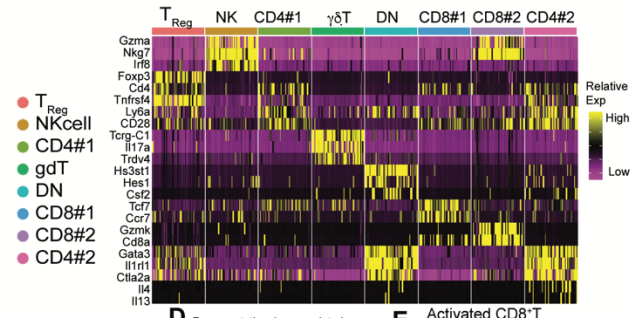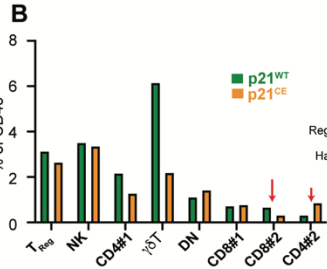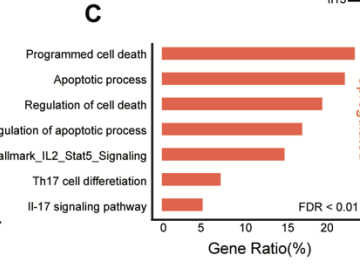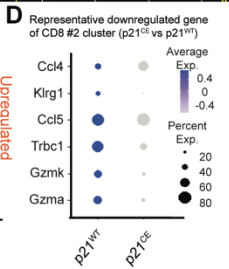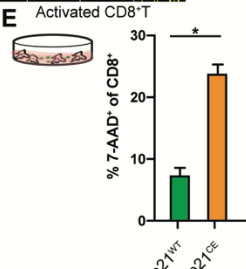

**F CyTOF on Orthotopic KP-2**

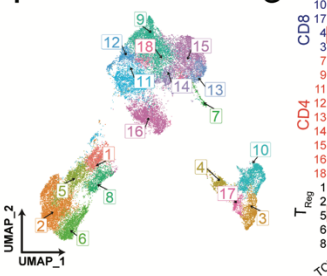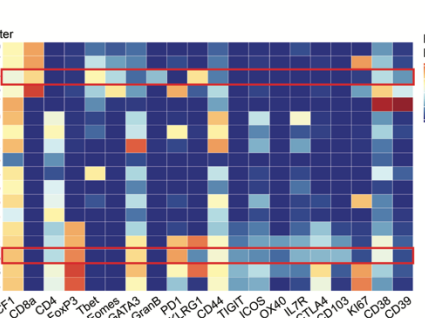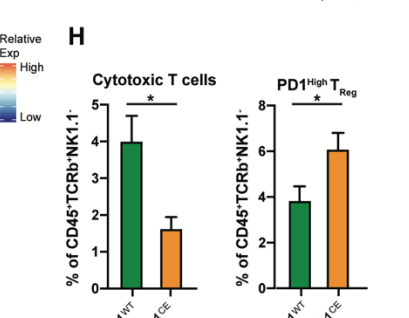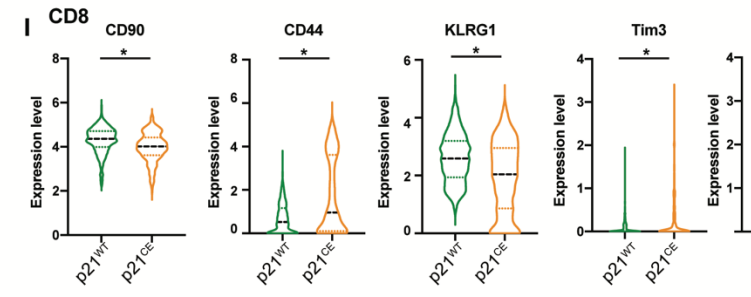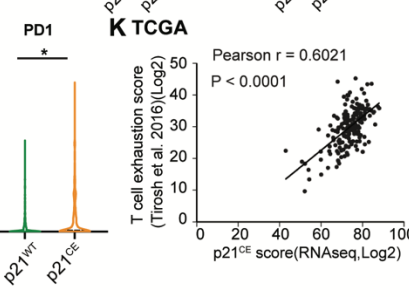

**Orthotopic KP-2 with T cell depletion**

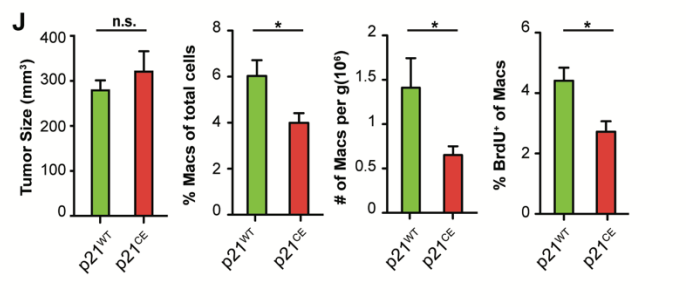

**Orthotopic KP-2**

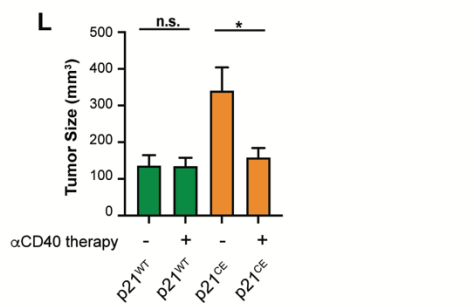

1394  
1395  
1396

1397 **Figure 7.**  
1398 **The p21 expression in macrophages impaired effector T cells. (A)** UMAP dimensionality reduction plot  
1399 of selected lymphocytes (clusters 6, 7, 8, 13, and 17 in Fig. S4, A and B) from p21<sup>WT</sup> and p21<sup>CE</sup> orthotopic  
1400 KP-2 tumors. Clusters were annotated with corresponding cell types and heat maps displaying selected  
1401 gene expressions in each cell type. **(B)** Bar graph displaying the composition of each cell type as the  
1402 percentage of total CD45<sup>+</sup> cells in p21<sup>WT</sup> and p21<sup>CE</sup> tumor-bearing mice. CD8#2 and CD4#2 are highlighted  
1403 with red arrows. **(C)** Bar graph displaying the upregulated pathways in the CD8#2 cluster from p21<sup>CE</sup> using  
1404 overrepresentation analysis of differentially-expressed genes (DEGs) to known biological functions (Gene  
1405 Ontology, Kyoto Encyclopedia of Genes and Genomes, REACTOME, and the Molecular Signal Database).  
1406 DEGs were filtered with a value of  $p < 0.05$ , fold-change  $> 1.2$ , and past MAST test. **(D)** Table showing the  
1407 differentially expressed genes comparing CD8#2 cluster from p21<sup>CE</sup> to p21<sup>WT</sup> with  $p.\text{value} < 0.05$ . **(E)** Bar  
1408 plot displaying the percentage of 7-AAD<sup>+</sup>CD8<sup>+</sup> T cells activated with CD3/CD28 Dynabeads (Gibco) when  
1409 cocultured with BMDMs from p21<sup>CE</sup> and p21<sup>WT</sup> mice for 48 h. Data were consistent in three independent  
1410 repeats. **(F)** UMAP plot of selected CD45<sup>+</sup>TCRb<sup>+</sup>CD90<sup>+</sup>NK1.1<sup>-</sup>TCR $\gamma\delta$ T<sup>-</sup> cells from p21<sup>CE</sup> and p21<sup>WT</sup>  
1411 orthotopic KP-2 tumors with clusters annotated;  $n = 7$  mice/group. **(G)** Heat map displaying the feature  
1412 expressions in each cluster. Cytotoxic T cells (cluster 4) and PD1<sup>High</sup> T<sub>reg</sub> (cluster 5) were highlighted. **(H)**  
1413 Bar plot showing the percentages of cytotoxic T cells and PD1<sup>High</sup> T<sub>reg</sub> in p21<sup>WT</sup> and p21<sup>CE</sup> tumors. **(I)** Violin  
1414 plot visualizing the expression levels of CD90, CD44, KLRG1, TIM3, and PD1 in the CD8 cluster between  
1415 tumors from two genotypes. **(J)** Bar graphs showing the tumor burden, macrophages as the percentage of  
1416 total cells, or as per gram of tissue, and the percentage of BrdU<sup>+</sup> macrophages between p21<sup>WT</sup> and p21<sup>CE</sup>  
1417 orthotopic KP-2 tumors after  $\alpha$ CD4/CD8 treatment;  $n = 6$  mice/group. **(K)** Correlation plots with Pearson  
1418 coefficients ( $r$ ) of p21<sup>CE</sup> score vs. T cell exhaustion score from TCGA PDAC PanCancer Atlas study ( $n=180$ ).  
1419 **(L)** Bar graph showing the tumor burdens of p21<sup>WT</sup> and p21<sup>CE</sup> mice bearing orthotopic KP-2 tumors with or  
1420 without CD40 agonist and gemcitabine treatment.  $n= 5-6$  mice/group. All graphs are expressed as the mean  
1421  $\pm$  SEM. n.s., not significant; \* $p < 0.05$  for comparisons between two groups **E,H,J,L**, Student's two-tailed  $t$ -  
1422 test was used. For comparisons in **I**, the Bonferroni-corrected  $p$ -value was used.

1423  
1424  
1425  
1426  
1427  
1428  
1429  
1430  
1431  
1432  
1433

Fig. S1

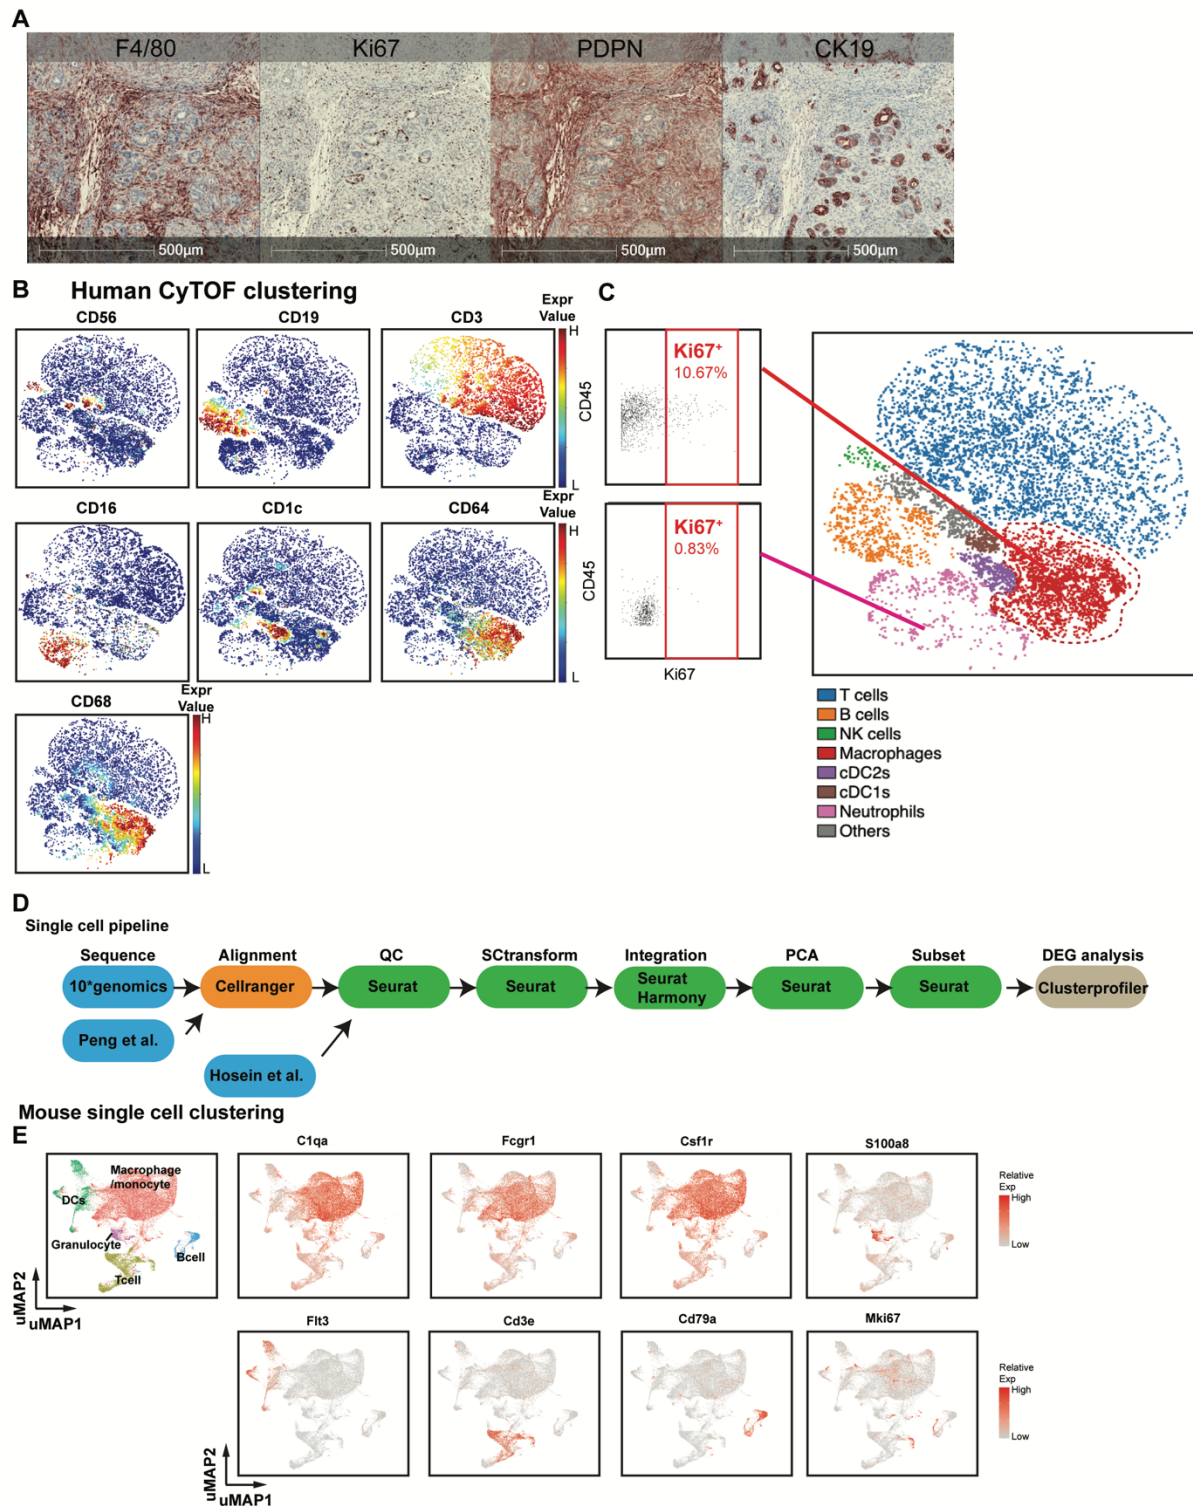

1434

1435

1436

1437 **Figure S1.**

1438 **(A)** Representative image of multiplex immunochemistry (mIHC) staining for F4/80<sup>+</sup>, Ki67<sup>+</sup>, PDPN<sup>+</sup>, and  
1439 CK19<sup>+</sup> cells in p48<sup>+</sup>Cre<sup>+</sup>/LSL-Kras<sup>G12D</sup>/p53<sup>fllox/fllox</sup> (KPC) genetically engineered mouse model (GEMM)  
1440 pancreatic ductal adenocarcinoma (PDAC) tumors. Individual staining of the same samples were  
1441 deconvoluted and merged through HALO software. Markers of interest were pseudo-colored and quantified  
1442 through the Indica Labs-Highplex FL v.4.0.3 algorithm; n = 6.

1443 **(B)** Representative tSNE plots of human pancreatic adenocarcinoma (PDAC) samples, displaying markers  
1444 used for identifying major cell types, CD56<sup>+</sup> for natural killer cells, CD19<sup>+</sup>CD3<sup>+</sup> for T cells, CD16<sup>+</sup> for  
1445 neutrophils, CD68<sup>+</sup>CD64<sup>+</sup>CD14<sup>+</sup> for macrophages, CD1c<sup>+</sup> for cDC2, and CD141<sup>+</sup> for cDC1 cells; n = 9  
1446 PDAC patients.

1447 **(C)** Representative Ki67<sup>+</sup> gating in macrophage and neutrophil clusters.

1448 **(D)** Schematic of the scRNAseq analysis pipeline. Details of each step for the specific dataset are listed in

1449 **Methods.**

1450 **(E)** UMAP plots of integrated sorted murine CD45<sup>+</sup> cells (from normal pancreas, pancreatic tissues from  
1451 KPC GEMMs and orthotopic PDAC tumors) with normalized expression levels of key genes across  
1452 subpopulations.

1453

1454

1455

1456

1457

1458

1459

1460

1461

1462

1463

1464

1465

1466

1467

1468

1469

1470

1471

1472

1473

1474

1475

1476

1477

1478

1479

1480

1481

1482

1483

Fig. S2

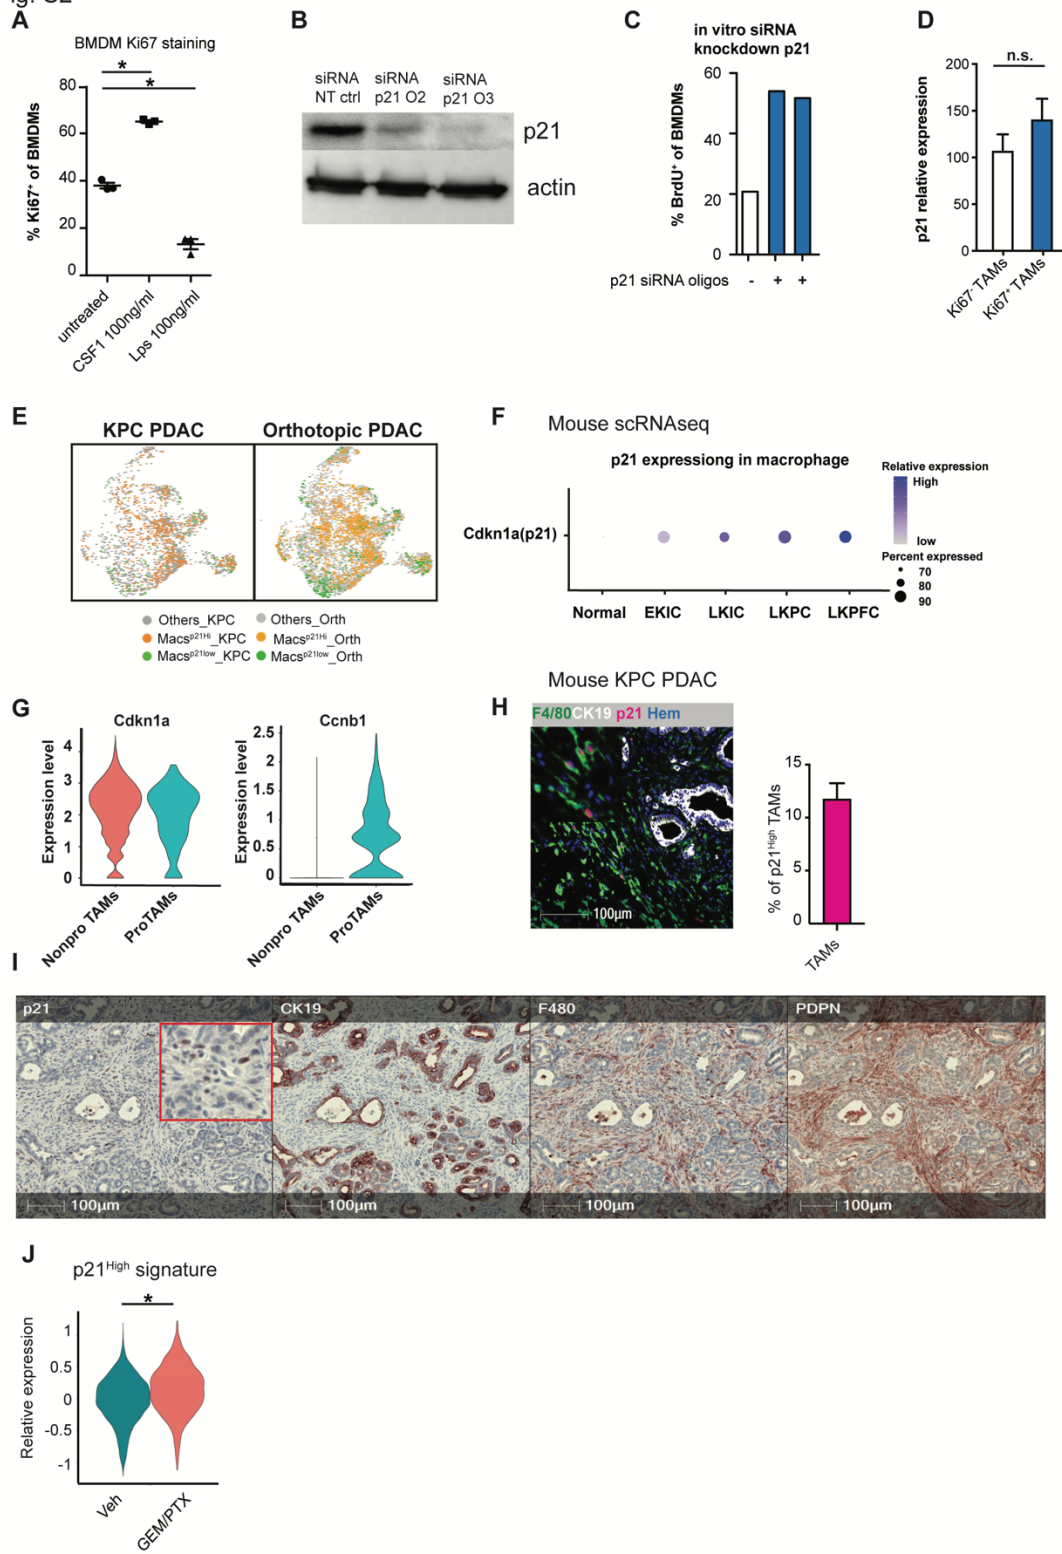

1484

1485

1486



1487 **Figure S2.**  
1488 **(A)** Dot plot displaying the percentage of Ki67<sup>+</sup> macrophages in bone marrow-derived macrophages  
1489 (BMDMs) after colony stimulating factor-1 (CSF1) or lipopolysaccharide treatment for 24 h; n = 3/group.  
1490 **(B)** Immunoblot showing expression of p21 in BMDMs after treatment with non-targeting siRNA or siRNA  
1491 targeting for p21 in the presence of CSF1 for 24 h. Experiments were repeated in more than three  
1492 independent repeats, and also included tumor conditioned-medium (TCM) treatment or were cultured with  
1493 fibroblasts in Transwell assays.  
1494 **(C)** Bar plot displaying quantification of BrdU<sup>+</sup> BMDMs in **B**. The 5-bromo-2'-deoxyuridine (BrdU) was  
1495 pulsed for 20 h. The experiments were repeated three times with three different siRNA oligonucleotides.  
1496 **(D)** Bar plot showing the expression levels of p21 in Ki67<sup>+</sup> and Ki67<sup>-</sup> tumor-associated macrophages (TAMs)  
1497 identified in **Fig. S1 C**; n = 9.  
1498 **(E)** UMAP displaying p21<sup>High</sup> and p21<sup>Low</sup> macrophages in p48<sup>Cre</sup>/<sup>+</sup>LSL-Kras<sup>G12D</sup>/p53<sup>flox/flox</sup> (KPC) pancreatic  
1499 ductal adenocarcinoma (PDAC) tumors and orthotopic KP-2 tumors.  
1500 **(F)** Dot plot showing Cdkn1a (p21) gene expressions in the normal pancreas and pancreatic tissue from  
1501 EKIC, LKIC, LKPC, and LKPFC genetically engineered mouse models (Hosein et al., 2019).  
1502 **(G)** Violin plot of the expressions of p21 and Ccnb1 in non-proliferating and proliferating macrophages in  
1503 the mouse scRNAseq dataset from the KPC, orthotopic KP-2, and normal pancreas in **Fig. 1 L**.  
1504 **(H)** Representative image of multiplex immunochemistry (mIHC) for F4/80<sup>+</sup> macrophages, CK19<sup>+</sup> tumor  
1505 cells, and p21<sup>+</sup> cells with quantification of p21<sup>+</sup> macrophages from KPC PDACs; n = 8.  
1506 **(I)** Representative mIHC images of KPC mouse PDACs displaying p21, CK19, F4/80, and Pdpn staining;  
1507 n = 8.  
1508 **(J)** Violin plot displaying the expressions of p21<sup>High</sup> signature scores, identified in **Fig. 4 M**, in tumor-  
1509 associated macrophages from KPC mice 24 h after gemcitabine and paclitaxel (GEM/PTX) or dimethyl  
1510 sulfoxide treatment. All graphs are expressed as the mean ± SEM. n.s., not significant; \*p < 0.05. All *in vitro*  
1511 assays were consistent across more than two independent repeats. For comparisons between any two  
1512 groups, Student's two-tailed *t*-test was used, except for **J** where the Bonferroni-corrected adjusted p-value  
1513 was used.  
1514  
1515  
1516  
1517  
1518  
1519  
1520  
1521  
1522  
1523  
1524  
1525  
1526  
1527  
1528

Fig. S3

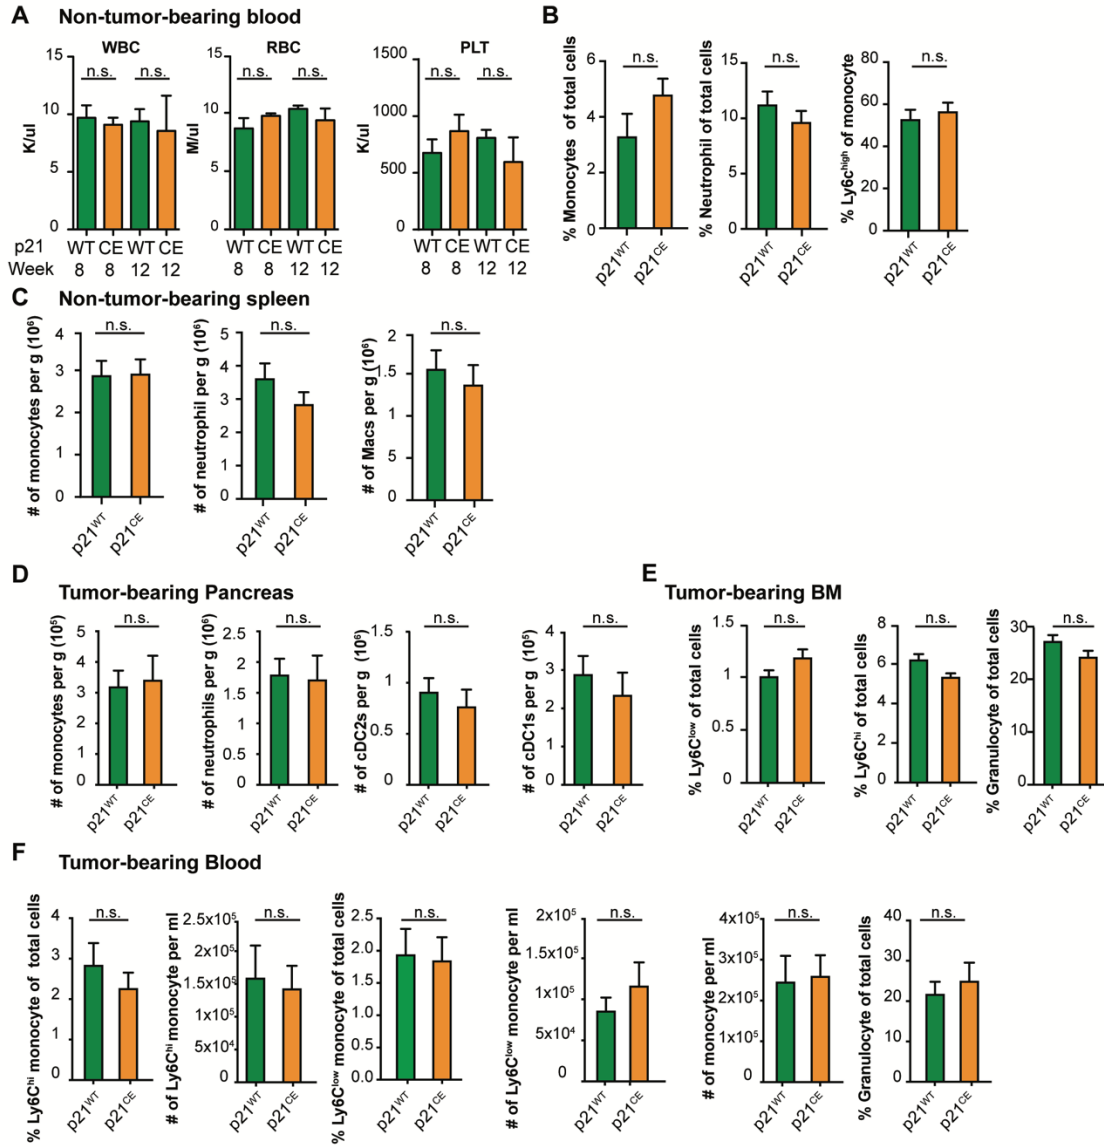

1529

1530

1531

1532 **Figure S3.**

1533 **(A)** Quantification of white blood cells, red blood cells, and platelets in non-tumor-bearing p21<sup>WT</sup> and p21<sup>CE</sup>  
1534 mice at weeks 8 and 12; n = 3–4 mice/group.

1535 **(B)** Flow cytometry quantification of total monocytes, neutrophils, and Ly6C<sup>hi</sup> monocytes in blood of non-  
1536 tumor-bearing p21<sup>WT</sup> and p21<sup>CE</sup> mice; n = 7–9 mice/group.

1537 **(C)** Flow cytometry quantification of monocytes, neutrophils, and macrophages in the spleens of 8–12  
1538 weeks p21<sup>WT</sup> and p21<sup>CE</sup> non-tumor-bearing mice; n = 7–9 mice/group.

1539 **(D)** Flow cytometry analysis of the number of monocytes, neutrophils, cDC2s, and cDC1s in the pancreas  
1540 of p21<sup>CE</sup> and p21<sup>WT</sup> mice bearing orthotopic KP-2 tumors; n = 6 mice/group.

1541 **(E)** Flow cytometry quantification of Ly6C<sup>hi</sup> monocytes, Ly6C<sup>low</sup> monocytes, and granulocytes in the bone  
1542 marrow of tumor-bearing p21<sup>CE</sup> and p21<sup>WT</sup> mice; n = 6 mice/group.

1543 **(F)** Flow cytometry quantification of myeloid cells in the blood of tumor-bearing p21<sup>CE</sup> and p21<sup>WT</sup> mice; n =  
1544 6 mice/group.

1545 All graphs are expressed as the mean ± SEM. n.s., not significant; \*p < 0.05. For comparisons between  
1546 any two groups, the Student's two-tailed *t*-test was used.

1547  
1548  
1549  
1550  
1551  
1552  
1553  
1554  
1555  
1556  
1557  
1558  
1559  
1560  
1561  
1562  
1563  
1564  
1565  
1566  
1567  
1568  
1569  
1570  
1571  
1572  
1573  
1574  
1575  
1576  
1577

Fig. S4

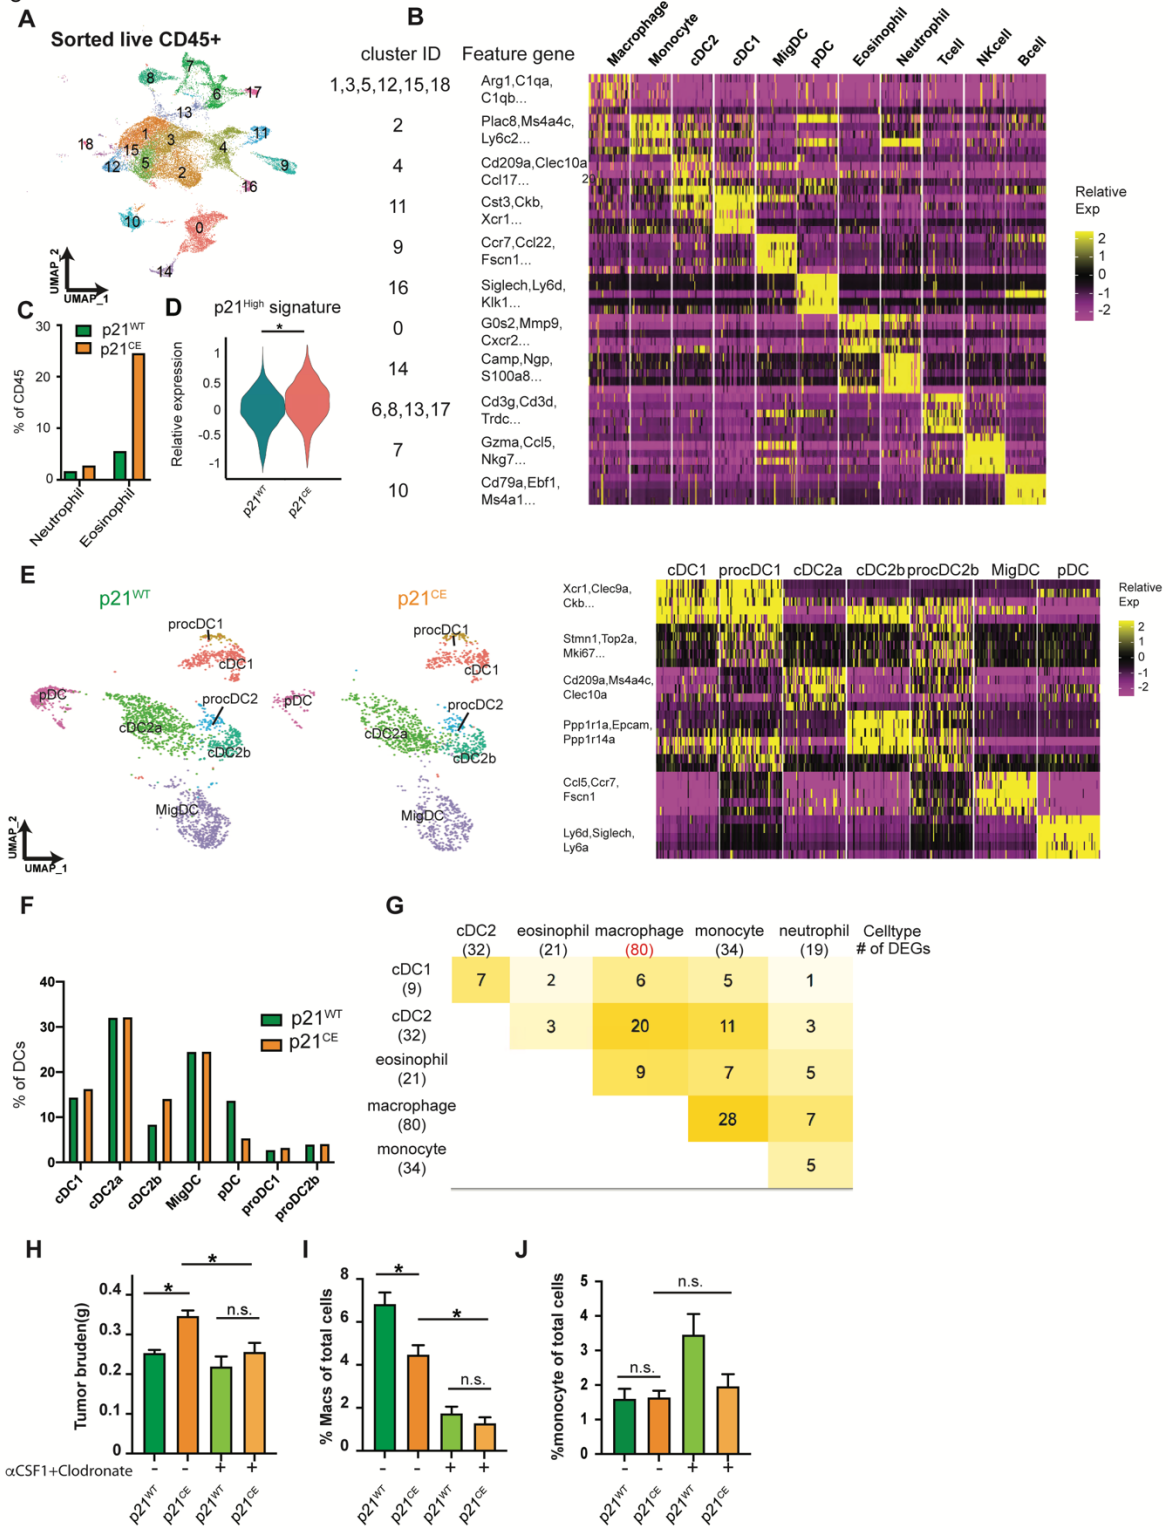

1578

1579

1580

1581 **Figure S4.**  
1582 **(A)** UMAP plot of all sorted CD45<sup>+</sup> cell clusters on merged objects from p21<sup>CE</sup> and p21<sup>WT</sup> KP-2 orthotopic  
1583 tumor-bearing mice. Three mice were pooled for each genotype.  
1584 **(B)** Heat map listing all clusters in **A** and corresponding cell type annotations and key gene expressions.  
1585 **(C)** Bar plot displaying the percentages of neutrophils and eosinophils in p21<sup>WT</sup> and p21<sup>CE</sup> tumor-bearing  
1586 mice.  
1587 **(D)** Violin plot displaying the expression levels of p21<sup>High</sup> signature scores, identified in **Fig. 4 M**, in TAMs  
1588 from p21<sup>CE</sup> and p21<sup>WT</sup> mice. \*Wilcox adjusted p.value < 0.05.  
1589 **(E)** UMAP plot of the reclustered DC populations in **Fig. 6 A**, annotated with cell type and associated key  
1590 gene expressions in the heat map (right).  
1591 **(F)** Quantification of major DC populations identified in **D** from p21<sup>CE</sup> tumors when compared with p21<sup>WT</sup>  
1592 tumors.  
1593 **(G)** Heat map showing the number of shared differentially-expressed genes (DEGs) between two  
1594 genotypes in each cell population, including macrophage and close lineages. The number of DEGs for each  
1595 single cell population when comparing p21<sup>CE</sup> to p21<sup>WT</sup> was listed in the parenthesis below.  
1596 **(H-J)** Bar plot showing the tumor burden, percentages of tumor-associated macrophages and monocytes  
1597 in p21<sup>WT</sup> and p21<sup>CE</sup> mice bearing orthotopic KP-2 tumors with or without colony stimulating factor-1 and  
1598 clodronate treatment; n = 8–10 mice/group. n.s., not significant; \*p < 0.05. For comparisons between any  
1599 two groups, the Student's two-tailed *t*-test was used.  
1600  
1601  
1602  
1603  
1604  
1605  
1606  
1607  
1608  
1609  
1610  
1611  
1612  
1613  
1614  
1615  
1616  
1617  
1618  
1619  
1620  
1621  
1622  
1623  
1624

Fig. S5

A

### Upregulated Pathway

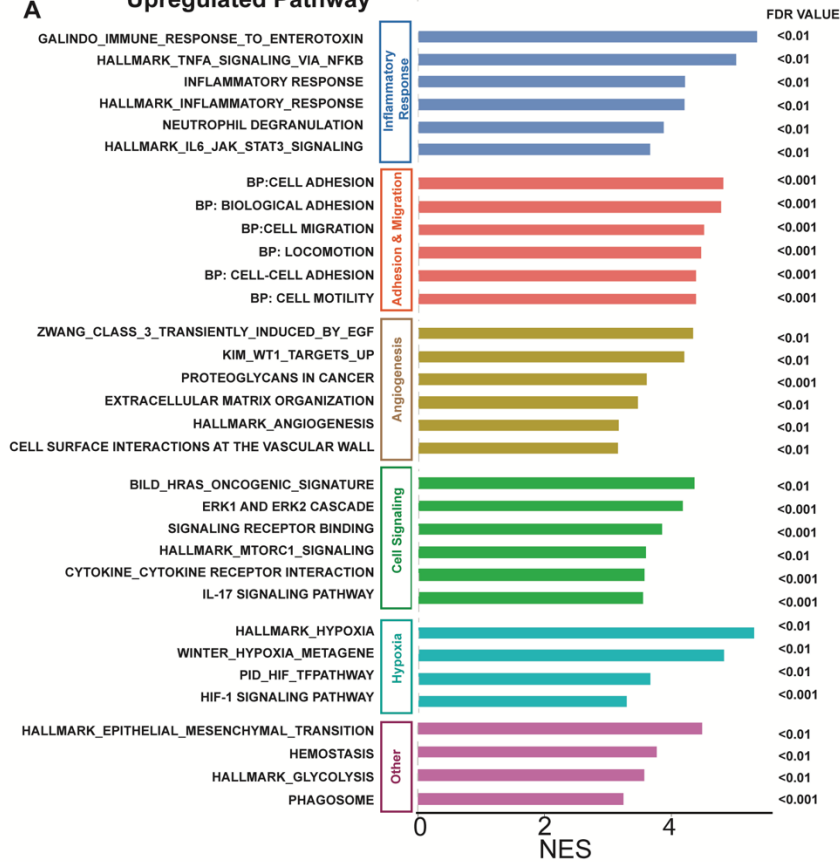

### Downregulated Pathway

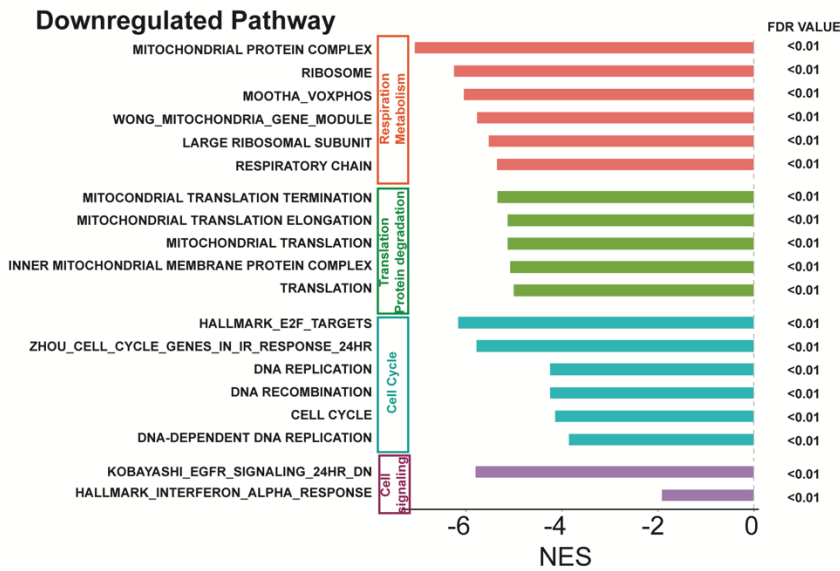

1625

1626

1627

1628 **Figure S5.**

1629 **(A)** Bar plot showing significantly upregulated and downregulated pathways identified by GSEA in tumor-  
1630 associated macrophages from p21<sup>CE</sup> compared with p21<sup>WT</sup> mice. The pathways were grouped into  
1631 biological functions with a false discovery rate < 0.01.

1632  
1633  
1634  
1635  
1636  
1637  
1638  
1639  
1640  
1641  
1642  
1643  
1644  
1645  
1646  
1647  
1648  
1649  
1650  
1651  
1652  
1653  
1654  
1655  
1656  
1657  
1658  
1659  
1660  
1661  
1662  
1663  
1664  
1665  
1666  
1667  
1668  
1669  
1670  
1671  
1672  
1673  
1674  
1675  
1676  
1677  
1678  
1679  
1680

1681 Table S1: Array top regulated genes sip21 vs. siNT; n = 3 each.

1682 Top downregulated genes

| GeneSymbol    | Fold Change<br>(sip21o2 vs siNT) | adjusted p | Fold Change<br>(sip21o3 vs siNT) | adjusted p |
|---------------|----------------------------------|------------|----------------------------------|------------|
| Hfm1          | -9.000967                        | 4.17E-06   | -9.551253                        | 3.30E-06   |
| Olf356        | -6.310875                        | 0.000277   | -6.7342                          | 0.000213   |
| Cnn1          | -4.243251                        | 2.60E-05   | -4.088136                        | 3.23E-05   |
| Supt3         | -3.3844                          | 6.81E-05   | -5.437286                        | 4.28E-06   |
| Cdkn1a        | -2.804869                        | 1.44E-07   | -5.631165                        | 1.15E-09   |
| Ear7          | -2.404938                        | 1.27E-06   | -2.886804                        | 2.29E-07   |
| Cdkn1a        | -2.396397                        | 4.53E-07   | -3.167768                        | 3.54E-08   |
| Spint1        | -1.945373                        | 0.000275   | -2.055021                        | 0.00015    |
| Spint1        | -1.826354                        | 5.97E-05   | -1.544564                        | 0.000716   |
| Slc36a2       | -1.781509                        | 2.15E-05   | -1.581507                        | 0.00014    |
| Ldhb          | -1.71729                         | 0.000103   | -1.817892                        | 4.60E-05   |
| 0610009E02Rik | -1.704009                        | 0.000111   | -1.568371                        | 0.000405   |
| Hpgd          | -1.689703                        | 7.12E-05   | -1.759566                        | 3.89E-05   |
| Rcctb2        | -1.67373                         | 4.01E-05   | -1.513442                        | 0.000225   |
| Gm9733        | -1.579973                        | 0.000145   | -1.708255                        | 4.09E-05   |
| Aldoc         | -1.547172                        | 6.71E-06   | -1.556962                        | 5.93E-06   |
| Ppp1r9a       | -1.54189                         | 5.78E-05   | -1.602184                        | 2.88E-05   |
| Sult1a1       | -1.538296                        | 0.000123   | -1.649467                        | 3.66E-05   |
| Cib2          | -1.522033                        | 0.000125   | -1.524215                        | 0.000121   |

1683

1684

1685

1686



1687  
1688  
1689  
1690  
1691

Top 50 upregulated genes

| GeneSymbol    | Fold-change<br>(sip21o2 vs TCM) | adjusted p | Fold-change<br>(sip21o3 vs TCM) | adjusted p |
|---------------|---------------------------------|------------|---------------------------------|------------|
| Rrm2          | -6.30647                        | 3.17E-11   | -7.95356                        | 1.02E-11   |
| Cdkn3         | -6.28505                        | 8.43E-10   | -6.7755                         | 5.76E-10   |
| Pif1          | -6.25111                        | 2.88E-07   | -8.06132                        | 8.74E-08   |
| Cxcl9         | -5.11269                        | 1.94E-05   | -5.20062                        | 1.78E-05   |
| Hmmr          | -4.85418                        | 3.20E-05   | -5.03176                        | 2.65E-05   |
| Hmmr          | -4.31765                        | 9.85E-05   | -4.58722                        | 7.12E-05   |
| Mastl         | -4.07957                        | 9.67E-07   | -4.21229                        | 7.90E-07   |
| Casc5         | -3.96834                        | 4.20E-05   | -5.70901                        | 5.80E-06   |
| Pif1          | -3.89545                        | 2.18E-05   | -4.68433                        | 7.38E-06   |
| Fancd2        | -3.83321                        | 2.11E-05   | -4.92167                        | 4.91E-06   |
| Esco2         | -3.67204                        | 6.75E-06   | -5.21945                        | 8.15E-07   |
| D17H6S56E-5   | -3.60167                        | 1.85E-08   | -4.03994                        | 8.27E-09   |
| Mastl         | -3.59825                        | 4.18E-06   | -4.83099                        | 6.63E-07   |
| Kif2c         | -3.54186                        | 1.80E-06   | -4.37275                        | 4.51E-07   |
| Nek2          | -3.52283                        | 2.45E-08   | -4.65013                        | 3.78E-09   |
| 2010110K18Rik | -3.49874                        | 1.67E-05   | -4.71255                        | 2.65E-06   |
| Cdca2         | -3.46713                        | 0.000389   | -4.92359                        | 5.65E-05   |
| Dlgap5        | -3.41372                        | 9.11E-08   | -4.60248                        | 1.20E-08   |
| Xkr5          | -3.39351                        | 0.000359   | -4.19719                        | 0.000105   |
| Foxm1         | -3.38906                        | 8.91E-08   | -4.27792                        | 1.76E-08   |

|          |          |          |          |          |
|----------|----------|----------|----------|----------|
| Prc1     | -3.34136 | 3.54E-09 | -4.5658  | 4.01E-10 |
| Fbxo48   | -3.29161 | 7.43E-06 | -4.39264 | 1.10E-06 |
| Prc1     | -3.25269 | 3.85E-07 | -4.169   | 6.68E-08 |
| Sgol1    | -3.21025 | 8.10E-07 | -3.98796 | 1.72E-07 |
| BC030867 | -3.20821 | 2.85E-08 | -4.46017 | 2.75E-09 |
| Depdc1a  | -3.19559 | 0.000114 | -3.78934 | 3.79E-05 |
| Ckap2l   | -3.17264 | 0.000106 | -4.27054 | 1.62E-05 |
| Kifc5b   | -3.13167 | 0.000538 | -4.41533 | 7.18E-05 |
| Cenpf    | -3.11857 | 7.64E-05 | -3.32338 | 4.92E-05 |
| Nusap1   | -3.0947  | 2.82E-09 | -4.11654 | 3.34E-10 |
| Kif4     | -3.09329 | 0.000319 | -3.63404 | 0.000115 |
| Kifc1    | -3.0841  | 5.61E-05 | -3.56142 | 2.08E-05 |
| Kif18b   | -3.08083 | 1.24E-05 | -4.31059 | 1.26E-06 |
| Prc1     | -3.07972 | 0.0001   | -3.4257  | 4.83E-05 |
| Rad51    | -3.07141 | 6.81E-08 | -3.88828 | 1.15E-08 |
| Pbk      | -3.06893 | 7.85E-06 | -3.44022 | 3.38E-06 |
| Aspm     | -3.06868 | 1.39E-06 | -4.04615 | 1.89E-07 |
| Sgol1    | -3.0153  | 1.27E-07 | -4.3219  | 9.18E-09 |
| Rad51ap1 | -3.01418 | 2.51E-08 | -4.12435 | 2.40E-09 |
| Ccna2    | -3.01189 | 1.32E-06 | -3.30825 | 6.34E-07 |
| Rad51ap1 | -2.99682 | 1.99E-06 | -3.89215 | 2.92E-07 |
| Efcab6   | -2.99481 | 2.19E-05 | -2.63158 | 6.16E-05 |
| Fam64a   | -2.98438 | 8.13E-08 | -4.08292 | 7.76E-09 |
| Shcbp1   | -2.9764  | 0.000173 | -3.27637 | 8.95E-05 |
| Ccnb2    | -2.97509 | 1.24E-08 | -3.76131 | 1.98E-09 |

|       |          |          |          |          |
|-------|----------|----------|----------|----------|
| Ccnb1 | -2.97083 | 2.59E-09 | -4.04031 | 2.45E-10 |
| Cdc20 | -2.96576 | 7.65E-08 | -3.80712 | 1.12E-08 |
| Ccnb1 | -2.96254 | 2.22E-07 | -3.57911 | 5.06E-08 |
| Anln  | -2.95577 | 1.58E-05 | -3.15593 | 9.56E-06 |

1692  
1693

1694

Table S2: Sequences of siRNAs targeting p21 and CSF1

| Clone Name                    | Target Gene ID                            | Sequence                                                                         |
|-------------------------------|-------------------------------------------|----------------------------------------------------------------------------------|
| mm.Ri.Cdkn1a.13.3             | NM_007669<br>NM_001111099                 | 5'rCrUrGrArCrArGrArUrUrUrCrUrArUrCrArCrGrCrUrU<br>rGrGrArGrUrGrArUrArGrArArA     |
| mm.Ri.Cdkn1a.13.2             | NM_007669<br>NM_001111099                 | 5'rArCrArGrUrCrCrUrArCrUrGrArUrArUrCrA<br>rGrArUrGrGrUrUrGrArUrArUrCrArGrU       |
| mm.Ri.Csf1.13.1               | NM_001113530<br>NM_007778<br>NM_001113529 | 5'rGrCrArGrCrAGrUrUrGrArUrCrGrArCrArCrArUrUrUr<br>GrArCrUrGrUrCrGrArUrCrArA      |
| mm.Ri.Csf1.13.2               | NM_001113530<br>NM_007778<br>NM_001113529 | 5'<br>rCrArGrGrUrGrGrArArCrUrGrCrCrArGrUrCrUrUrUrCr<br>UrArUrArCrUrGrGrCrArGrUrU |
| siNC                          | Negative Control(DS<br>NC1)               | na                                                                               |
| Primer:ROSA-CAG-<br>ES-PC-For | This paper                                | 5'CTAAAGAAGAGGCTGTGCTTTGGGGCTCVG                                                 |
| Primer:CAG-R2                 | This paper                                | 5' CTCCACCCATTGACGTCAATGGAAAGTCCC                                                |
| Primer:BGH-F3                 | This paper                                | 5' CGACTGTGCCTTCTAGTTGCCAGCCATCTG                                                |
| Primer:ROSA-R10               | This paper                                | 5' CACTTGTGGTCTTCAGACACACCAGAAGAG                                                |
| Primer:ROSA-WT-F1             | This paper                                | 5'GTTATCAGTAAGGGAGTGCAGTGGAGTAG                                                  |
| Primer:ROSA-WT-R1             | This paper                                | 5'CCGAAAATCTGTGGGAAGTCTTGTCCCTCC                                                 |
| Primer:CAG-R2                 | This paper                                | 5'CTCCACCCATTGACGTCAATGGAAAGTCCC                                                 |

|                  |                                         |                          |
|------------------|-----------------------------------------|--------------------------|
| Primer:12427     | C.Deng et.al(Deng et al., 1995)         | 5' GTTGTCTCGCCCTCATCTA   |
| Primer:12428     | C.Deng et.al(1)                         | 5' GCCTATGTTGGGAAACCAGA  |
| Primer:12429     | C.Deng et.al(1)                         | 5' CTGTCCATCTGCACGAGACTA |
| Primer:oIMR3067  | B E Clausen et.al(Clausen et al., 1999) | 5' CTTGGGCTGCCAGAATTTCTC |
| Primer: oIMR3066 | B E Clausen et.al(Clausen et al., 1999) | 5' CCCAGAAATGCCAGATTACG  |
| Primer:oIMR3068  | B E Clausen et.al(Clausen et al., 1999) | 5' TTACAGTCGGCCAGGCTGAC  |

1695  
1696

1697 Table S3: Antibody list for flow cytometry

| Name  | Identifier       | Clone#   | Company        | Dilution |
|-------|------------------|----------|----------------|----------|
| CD45  | RRID:AB_469625   | 30-F11   | eBioscience    | 1:400    |
| CD3e  | RRID:AB_469315   | 145-2C11 | eBioscience    | 1:200    |
| CD4   | RRID:AB_464900   | RM4-4    | eBioscience    | 1:200    |
| CD8a  | RRID:AB_2732919  | 53-6.7   | BD Biosciences | 1:200    |
| Foxp3 | RRID:AB_11218094 | FJK-16s  | eBioscience    | 1:100    |
| CD19  | RRID:AB_1659676  | eBio1D3  | eBioscience    | 1:200    |
| CD11b | RRID:AB_657585   | M1/70    | eBioscience    | 1:400    |
| CD11c | RRID:AB_1548652  | N418     | eBioscience    | 1:200    |
| Ly6C  | RRID:AB_1518762  | HK1.4    | eBioscience    | 1:400    |
| Ly6G  | RRID:AB_1186104  | 1A8      | BioLegend      | 1:400    |
| F4/80 | RRID:AB_468798   | BM8      | eBioscience    | 1:400    |

|       |                  |             |              |       |
|-------|------------------|-------------|--------------|-------|
| MHCII | RRID:AB_1272204  | M5/115.15.2 | eBioscience  | 1:400 |
| CD24  | RRID:AB_464985   | 30-F1       | eBioscience  | 1:200 |
| CD44  | RRID:AB_1272246  | IM7         | eBioscience  | 1:200 |
| CD62L | RRID:AB_11125577 | MEL-14      | BioLegend    | 1:100 |
| Flt3  | RRID:1B_1877218  | A2F10       | BioLegend    | 1:20  |
| CD115 | RRID:AB_467428   | AFS98       | eBioscience  | 1:50  |
| B220  | RRID:AB_396673   | RA3-6B2     | eBiosciences | 1:100 |
| gdTCR | RRID:AB_842756   | eBioGl3     | eBioscience  | 1:200 |
| Nk1.1 | RRID:AB_467736   | PK136       | eBioscience  | 1:100 |
| Sca1  | RRID:AB_467778   | D7          | BioLegend    | 1:100 |
| Cd49b | RRID:AB_395093   | DX5         | eBioscience  | 1:200 |

1698  
1699

1700

Table S4: Antibody list for multiplex immunocytochemistry (mIHC) and immunoblotting

| Name       | Identifier     | Clone#   | Company        | Dilution |
|------------|----------------|----------|----------------|----------|
| P21        | Ab188224       | EPR18021 | Abcam          | 1:200    |
| Ck19       | RRID:AB_469315 | 145-2C11 | eBioscience    | 1:200    |
| Ki-67      | 12202          | D3B5     | Cell Signaling | 1:400    |
| Podoplanin | Ab11936        | RTD4E10  | Abcam          | 1:800    |
| F4/80      | 70076          | D2S9R    | Cell Signaling | 1:200    |
| pp65       | 3033           | 93H1     | Cell Signaling | 1:500    |
| Cyclin d1  | 2926           | DCS6     | Cell Signaling | 1:500    |
| c-Myc      | 13987          | D3N8F    | Cell Signaling | 1:500    |
| P27        | 3686           | D69C12   | Cell Signaling | 1:500    |

1701  
1702  
1703  
1704

1705 Table S5: Antibody list for human mass cytometry time of flight

| REAGENT or RESOURCE              | SOURCE    | IDENTIFIER |
|----------------------------------|-----------|------------|
| anti-human CD11b (ICRF44)        | Fluidigm  | #3209003B  |
| anti-human CD11c (Bu15)          | Fluidigm  | #3159001B  |
| anti-human CD14 (M5E2)           | Fluidigm  | #3160001B  |
| anti-human CD141 (1A4)           | Fluidigm  | #3173002B  |
| anti-human CD15 (W6D3)           | Fluidigm  | #3164001B  |
| anti-human CD16 (3G8)            | Fluidigm  | #3148004B  |
| anti-human CD163 (GHI/61)        | Fluidigm  | #3154007B  |
| anti-human CD19 (HIB19)          | Fluidigm  | #3142001B  |
| anti-human CD192 (CCR2) (K036C2) | Fluidigm  | #3153023B  |
| anti-human CD1c (L161)           | BioLegend | #331502    |
| anti-human CD20 (2H7)            | Fluidigm  | #3147001B  |
| anti-human CD206 (MMR) (15-2)    | Fluidigm  | #3168008B  |
| anti-human CD24 (ML5)            | Fluidigm  | #3166007B  |
| anti-human CD3 (UCHT1)           | BioLegend | #300402    |
| anti-human CD32 (FUN-2)          | Fluidigm  | #3169020B  |
| anti-human CD34 (581)            | Fluidigm  | #3149013B  |
| anti-human CD38 (HIT2)           | Fluidigm  | #3167001B  |
| anti-human CD40 (5C3)            | Fluidigm  | #3165005B  |
| anti-human CD45 (HI30)           | Fluidigm  | #3089003B  |
| anti-human CD54 (HA58)           | Fluidigm  | #3170014B  |
| anti-human CD56 (NCAM16.2)       | Fluidigm  | #3176008B  |
| anti-human CD64 (10.1)           | Fluidigm  | #3146006B  |
| anti-human CD68 (Y1/82A)         | Fluidigm  | #3171011B  |

|                           |            |           |
|---------------------------|------------|-----------|
| anti-human CD80 (2D10.4)  | Fluidigm   | #3162010B |
| anti-human CD81 (5A6)     | Fluidigm   | #3145007B |
| anti-human CD82 (ASL-24)  | Fluidigm   | #3158025B |
| anti-human CD86 (IT2.2)   | Fluidigm   | #3150020B |
| anti-human CX3CR1 (2A9-1) | Fluidigm   | #3172017B |
| anti-human CXCR4 (12G5)   | Fluidigm   | #3175001B |
| anti-human HLA-DR (L243)  | Fluidigm   | #3174001B |
| anti-human Ki-67 (B56)    | Fluidigm   | #3161007B |
| Anti-human PCNA(PC10)     | Abcam      | Ab29      |
| Anti-human p21(12D1)      | CellSignal | 2947      |

1706  
1707

1708

Table S6: Antibody list for mouse mass cytometry time of flight (CyTOF)

| REAGENT or RESOURCE         | SOURCE      | Catalog    |
|-----------------------------|-------------|------------|
| anti-mouse CD44(IM7)        | Leinco      | C382       |
| anti-mouse GITR(DTA-1)      | BioXcell    | BE0063     |
| anti-mouse CD25(PC61)       | Leinco      | C1194      |
| anti-mouse CD38(90)         | eBioscience | 14-0381-82 |
| anti-mouse CD90(G7)         | Biolegend   | 105202     |
| anti-mouse Lag-3(C9B7W)     | Leinco      | L306       |
| anti-mouse CD27(LG.7F9)     | eBioscience | 50-124-94  |
| anti-mouse KLRG1(2F1/KLRG1) | BioXCell    | BE0201     |
| anti-mouse CD103(2E7)       | Biolegend   | 121402     |
| Anti-mouse CD4(GK1.5)       | BioXcell    | BE0003-1   |
| anti-mouse CD45(30-F11)     | Fluidigm    | 3089005B   |
| anti-mouse CD62L(MEL-14)    | Leinco      | C2118      |

|                                           |             |            |
|-------------------------------------------|-------------|------------|
| anti-mouse ICOS(C398.4A)                  | eBioscience | 14-9949-82 |
| anti-mouse OX-40(OX-86)                   | BioXcell    | BE0031     |
| anti-mouse PD-1(RMP1-30)                  | eBioscience | 14-9981-82 |
| anti-mouse TIGIT(1G9)                     | BioXcell    | BE0274     |
| anti-mouse CD69(H1.2F3)                   | eBioscience | 14-0691-82 |
| anti-mouse TCRb(H57-597)                  | BioXcell    | BE0102     |
| anti-mouse CD127(A7R34)                   | BioXcell    | BE0065     |
| anti-mouse CD39(Duha59)                   | Biolegend   | 143802     |
| anti-mouse NK1.1(PK136)                   | BioXcell    | BE0036     |
| anti-mouse CD8a(53-6.7)                   | Leinco      | C375       |
| anti-mouse TCRgd(GL3)                     | eBioscience | 14-5711-82 |
| anti-mouse Tim3(RMT3-23)                  | BioXcell    | BE0115     |
| anti-mouse 4-1BB(17B5)                    | BioLegend   | 106107     |
| anti-mouse FoxP3(FJK-16s)                 | eBioscience | 14-5773-82 |
| anti-mouse GATA3(TWAJ)                    | eBioscience | 14-9966-82 |
| anti-mouse GranzymeB(GB11)                | eBioscience | MA1-80734  |
| anti-mouse CTLA-4(UC10-4B9)               | eBioscience | 50-129-16  |
| anti-mouse Ki67(8D5)                      | Novus       | NBP2-22112 |
| anti-mouse TCF1(812145)                   | R&D         | MAB8224    |
| anti-mouse ROR- $\gamma$ $\tau$ (AFKJS-9) | eBioscience | 14-6988-82 |
| anti-mouse Eomes(Dan11mag)                | eBioscience | 50-245-556 |
| Anti-mouse T-bet(4B10)                    | Biolegend   | 644802     |

1709  
1710

Table S7: List of qPCR primers

| Gene | Source | Assay ID |
|------|--------|----------|
|------|--------|----------|



|                |        |               |
|----------------|--------|---------------|
| GAPDH          | Taqman | Mm99999915_g1 |
| TBP            | Taqman | Mm01277042_m1 |
| HPRT           | Taqman | Mm03024075_m1 |
| CCND1          | Taqman | Mm00432359_m1 |
| CCNE1          | Taqman | Mm01266311_m1 |
| CCNA2          | Taqman | Mm00438063_m1 |
| IFIT3          | Taqman | Mm01704846_s1 |
| CD40           | Taqman | Mm00441891_m1 |
| IFNA1          | Taqman | Mm03030145_gH |
| IFNB1          | Taqman | Mm00439546_s1 |
| IRF1           | Taqman | Mm01288580_m1 |
| CDKN1A         | Taqman | Mm04205640_g1 |
| CSF1           | Taqman | Mm00432686_m1 |
| CXCL1          | Taqman | Mm04207460_m1 |
| CXCL2          | Taqman | Mm00436450_m1 |
| IL-1 $\alpha$  | Taqman | Mm00439620_m1 |
| IL-1 $\beta$   | Taqman | Mm00434228_m1 |
| IL-6           | Taqman | Mm00446190_m1 |
| TNF- $\alpha$  | Taqman | Mm00443258_m1 |
| IRF4           | Taqman | Mm00516431_m1 |
| TGF- $\beta$ 2 | Taqman | Mm00436955_m1 |
| TGF- $\beta$ 3 | Taqman | Mm00436960_m1 |
| YM1            | Taqman | Mm00657889_mH |
| BATF           | Taqman | Mm00479410_m1 |

|       |        |               |
|-------|--------|---------------|
| c-Myc | Taqman | Mm00487804_m1 |
| CCL2  | Taqman | Mm00441242_m1 |

1711  
1712

1713 Table S8: Experimental Models: Organisms/strains

| Strain                                                                   | Source                 | Identifier     |
|--------------------------------------------------------------------------|------------------------|----------------|
| Mouse:B6.Cg-ROSA26tm1 <sup>(LSL-p21-YFP)</sup>                           | This paper             | N/A            |
| Mouse:C57BL/6J                                                           | The Jackson Laboratory | Stock# 000664  |
| Mouse:B6.129S6(Cg)-Cdkn1a <sup>tm1Led</sup>                              | The Jackson Laboratory | Stock # 016565 |
| Mouse:B6.129p2-lyz2 <sup>tm1(cre)ifo</sup>                               | The Jackson Laboratory | Stock # 004781 |
| Mouse:B6.p48-Cre;Kras <sup>LSL-G12D</sup> ;Trp53 <sup>fl/fl</sup><br>KPC | i.e. N/A               | N/A            |

1714  
1715

1716 Table S9: Software and Algorithms

|                |                                  |                                                                                                                         |
|----------------|----------------------------------|-------------------------------------------------------------------------------------------------------------------------|
| Flowjo v10.7.2 | Flowjo, L.L.C.                   | Flowjo, L.L.C.                                                                                                          |
| Prism v9       | Graphpad                         | <a href="http://www.graphpad.com">www.graphpad.com</a>                                                                  |
| Docker         | Rocker/rstudio:latest            | <a href="https://hub.docker.com/r/rocker/rstudio">https://hub.docker.com/r/rocker/rstudio</a>                           |
|                | cumulusprod/cellranger:4.0.0     | <a href="https://hub.docker.com/r/cumulusprod/cellranger/tags">https://hub.docker.com/r/cumulusprod/cellranger/tags</a> |
| HALO v3.2.1851 | Indica Labs-High Plex Fv4.0.3    | <a href="https://indicalab.com/products/high-plex-fl/">https://indicalab.com/products/high-plex-fl/</a>                 |
|                | Indica Labs-Deconvolution v1.0.4 |                                                                                                                         |
| Cytobank       | Cytobank, Inc                    | <a href="http://Wustl.cytobank.org">Wustl.cytobank.org</a>                                                              |
| FACSDiva       | BD Biosciences                   | RRID: SCR_001456                                                                                                        |
| Zen            | Zeiss                            | <a href="http://Zeiss.com">Zeiss.com</a>                                                                                |
| Morpheus       | Broad Institute                  | <a href="https://software.broadinstitute.org/morpheus/">https://software.broadinstitute.org/morpheus/</a>               |
| Fiji v2.0.0    | ImageJ                           |                                                                                                                         |

|          |                                     |                                                                                                                             |
|----------|-------------------------------------|-----------------------------------------------------------------------------------------------------------------------------|
| R v3.6.3 | R Core Team                         | <a href="https://cran.r-project.org/bin/windows/base/old/3.6.3/">https://cran.r-project.org/bin/windows/base/old/3.6.3/</a> |
|          | ClusterProfiler (Wu et al., 2021)   | <a href="https://github.com/YuLab-SMU/clusterProfiler">https://github.com/YuLab-SMU/clusterProfiler</a>                     |
|          | Seurat v 3.2.0(Stuart et al., 2019) | <a href="https://satijalab.org/seurat/">https://satijalab.org/seurat/</a>                                                   |
|          | Harmony(Korsunsky et al., 2019)     | <a href="https://github.com/immunogenomics/harmony">https://github.com/immunogenomics/harmony</a>                           |
|          | CATALYST(Nowicka et al., 2017)      | <a href="https://github.com/HelenaLC/CATALYST">https://github.com/HelenaLC/CATALYST</a>                                     |

1717  
1718

1719 Table S10: Chemicals and recombinant proteins

| Reagent                                     | Source            | Identifier  |
|---------------------------------------------|-------------------|-------------|
| CSF1 neutralizing antibody(Clone 5A1)       | BioXCell          | BE0204      |
| CSF1R depleting antibody(Clone AFS98)       | BioXCell          | BE0213      |
| PBS Liposomes & Clodronate Liposomes        | Liposoma          | CP-005-005  |
| Recombinant murine CSF1 peptide             | Peprtech          | 315-02      |
| Carboxyfluorescein succinimidyl ester(CFSE) | Invitrogen        | C1157       |
| Tamoxifen                                   | Sigma-Aldrich     | T5648       |
| Halt Protease and Phosphatase Inhibitor     | Thermo Scientific | 78442       |
| RIPA Buffer(10x)                            | Cell Signaling    | UN3082      |
| CD45 MicroBeads                             | Miltenyi Biotec   | 130-052-301 |

1720  
1721

1722 Table S11: Critical commercial assays

| Resources                                 | Source        | Catalog number |
|-------------------------------------------|---------------|----------------|
| Supersignal West Dura                     | Thermo        | 34075          |
| FITC BrdU Flow Kit                        | BD Bioscience | 557891         |
| APC BrdU Flow Kit                         | BD Bioscience | 557892         |
| Proteome Profiler Mouse XL Cytokine Array | R&D systems   | ARY028         |

|                                       |                   |           |
|---------------------------------------|-------------------|-----------|
| E.Z.N.A. Total RNA Kit I              | Omega             | R6834-02  |
| Taqman Gene Expression Master Mix     | Thermo Fisher     | 4370074   |
| qScript cDNA Supermix kit             | Quantabio         | 95048-500 |
| BOND Polymer Refine Detection Kit     | Leica             | DS9800    |
| BOND Polymer Refine Red Detection Kit | Leica             | DS9390    |
| BOND Intense R Detection Kit          | Leica             | DS9263    |
| Cytofix Kit                           | BD Bioscience     | 554655    |
| MACS LS kit                           | Miltenyi          | 130042401 |
| Mouse Macrophage Nucleofector Kit     | Lonza             | VPA-1009  |
| Latex Beads-Rabbit IgG-PE Complex     | Cayman            | 600541    |
| Mouse M-CSF Matched Antibody Pair Kit | Abcam             | Ab218788  |
| Pierce BCA Protein Assay Kit          | Thermo Scientific | 23225     |
| DuoSet ELISA Mouse M-CSF              | R&D system        | DY416-05  |
| DuoSet Ancillary Reagent Kit2         | R&D system        | DY008     |

1723  
1724
